# Supplementary material
Source: PubMed Central journal article supplement (PMC7489418)
Supplement: jama-e2017022-s002.pdf [file jama-e2017022-s002.pdf]

## Supplementary Online Content

The REMAP-CAP Writing Committee for the REMAP-CAP Investigators. Effect of hydrocortisone on mortality and organ support in patients with severe COVID-19: the REMAP-CAP COVID-19 corticosteroid domain randomized clinical trial. *JAMA*. doi:10.1001/jama.2020.17022

**eAppendix 1.** Severe COVID-19 Eligibility

**eAppendix 2.** Site Participation in the Corticosteroid Domain

**eTable 1.** Secondary Analyses of Primary Outcome (Organ Support–Free Days), Restricted to Participants Enrolled in the Corticosteroid Domain

**eTable 2.** Secondary Analyses of Primary Outcome and of Mortality With Fixed Dose and Shock-Dependent Hydrocortisone Groups Combined

**eTable 3.** Secondary Analyses of In-Hospital Mortality

**eAppendix 3.** Technical Report from the Statistical Analysis Committee for SAP Outcome Analyses 15.1-4

**eAppendix 4.** Technical Report from Berry Consultants for SAP Outcome Analyses 15.5-20

**eAppendix 5.** The REMAP-CAP Investigators

This supplementary material has been provided by the authors to give readers additional information about their work.

# eAppendix 1. Severe COVID-19 Eligibility

## Platform Inclusion criteria

1. Adult patient admitted to hospital with acute illness due to suspected or proven pandemic (COVID-19) infection

## Platform Exclusion criteria

1. Death is deemed to be imminent and inevitable during the next 24 hours AND one or more of the patient, substitute decision maker or attending physician are not committed to full active treatment
2. Patient is expected to be discharged from hospital today or tomorrow
3. More than 14 days have elapsed while admitted to hospital with symptoms of an acute illness due to suspected or proven pandemic infection
4. Previous participation in this REMAP within the last 90 days

## Corticosteroid Domain Specific Inclusion criteria

1. Severe disease state, defined by receiving respiratory or cardiovascular organ failure support in an intensive care unit (ICU).
  - a. Respiratory organ support is defined as invasive or non-invasive mechanical ventilation including via high flow nasal cannula if flow rate >30 L/min and  $FI_{O_2}$  >0.4. If non-invasive ventilation would normally be provided but is being withheld, due to infection control concerns associated with aerosol generating procedures, then the patient still meets the severe disease state criteria.
  - b. Cardiovascular organ support was defined as the intravenous infusion of any vasopressor or inotrope.
  - c. Pandemic surge capacity means that provision of advanced organ support may need to occur in locations that do not usually provide ICU-level care. Therefore, an ICU is defined as an area within the hospital that is repurposed so as to be able to deliver one or more of the qualifying organ failure supports (non-invasive ventilation, invasive ventilation, and vasopressor therapy)

## Corticosteroid Domain Specific Exclusion criteria

1. Known hypersensitivity to hydrocortisone
2. Intention to prescribe systemic corticosteroids for a reason that is unrelated to the current episode of CAP / COVID-19 (or direct complications of CAP / COVID-19), such as chronic corticosteroid use before admission, acute severe asthma, or suspected or proven Pneumocystis jirovecii pneumonia
3. More than 36 hours have elapsed since ICU admission (noting that this may be operationalized as more than 24 hours has elapsed since commencement of sustained organ failure support)
4. Patient has been randomized in a trial evaluating corticosteroids, where the protocol of that trial requires ongoing administration of study drug
5. The treating clinician believes that participation in the domain would not be in the best interests of the patient

## eAppendix 2. Site Participation in the Corticosteroid Domain

During the study period, 113 sites were open for enrollment in the Corticosteroid Domain. Of these, 24 (21%) only offered active hydrocortisone assignments (fixed dose and shock-dependent). These sites included 18 (22%) of the 82 UK and Irish sites, 2 (33%) of the 6 continental European sites, and 4 (25%) of the 16 Australasian sites. Among the 384 patients enrolled in the Corticosteroid Domain cohort, 70 (18%) were enrolled at the 24 sites that only offered the 2 active hydrocortisone groups. The baseline characteristics were similar for those enrolled at sites that did (n=314) and did not (n=70) offer a 'no hydrocortisone' assignment (mean APACHE II score: 17 vs. 18; mean time from ICU admission to enrollment: 13.5 vs. 12.2 hours; baseline invasive mechanical ventilation rate: 55% vs. 56%; baseline vasopressor use: 35% versus 34%).

eTable 1. Secondary Analyses of Primary Outcome (Organ Support-free Days), restricted to participants enrolled in Corticosteroid Domain

| Analysis                                              | Fixed Dose Hydrocortisone (N=137) | Shock-dependent Hydrocortisone (N=141) | No Hydrocortisone (N=101) |
|-------------------------------------------------------|-----------------------------------|----------------------------------------|---------------------------|
| Excluding those ruled out (n=89) for COVID-19 (n=290) |                                   |                                        |                           |
| Adjusted OR - mean (SD)                               | 1.36 (0.36)                       | 1.06 (0.29)                            | 1                         |
| - median (95% CrI)                                    | 1.32 (0.79 - 2.16)                | 1.02 (0.60 - 1.73)                     | 1                         |
| Probability of superiority to no hydrocortisone, %    | 85                                | 53                                     | -                         |
| With removal of site and time from model (n=379)      |                                   |                                        |                           |
| Adjusted OR - mean (SD)                               | 1.50 (0.34)                       | 1.42 (0.31)                            | 1                         |
| - median (95% CrI)                                    | 1.46 (0.94 - 2.26)                | 1.38 (0.90 - 2.12)                     | 1                         |
| Probability of superiority to no hydrocortisone, %    | 95                                | 93                                     | -                         |

Analyses were restricted to participants enrolled in the Corticosteroid Domain (n=379) and did not include information on assignment to interventions other than hydrocortisone. Models are structured such that a higher OR is favorable.

SD - standard deviation; CrI - credible interval; OR - odds ratio.

eTable 2. Secondary Analyses of Primary Outcome and of Mortality with Fixed Dose and Shock-dependent Hydrocortisone Groups Combined

| Outcome and Analysis                                                       | Combined Hydrocortisone Groups (N=278) | No Hydrocortisone (N=101) |
|----------------------------------------------------------------------------|----------------------------------------|---------------------------|
| Organ Support Free-Days                                                    |                                        |                           |
| Model using data from all COVID-19 severe state participants (n=576)       |                                        |                           |
| Adjusted OR - mean (SD)                                                    | 1.37 (0.29)                            | 1                         |
| - median (95% CrI)                                                         | 1.34 (0.88 - 2.02)                     | 1                         |
| Probability of superiority to no hydrocortisone, %                         | 91                                     | -                         |
| Model restricted to participants enrolled in Corticosteroid Domain (n=379) |                                        |                           |
| Adjusted OR - mean (SD)                                                    | 1.40 (0.30)                            | 1                         |
| - median (95% CrI)                                                         | 1.36 (0.91 - 2.07)                     | 1                         |
| Probability of superiority to no hydrocortisone, %                         | 93                                     | -                         |
| In-hospital Mortality                                                      |                                        |                           |
| Model using data from all COVID-19 severe state participants (n=576)       |                                        |                           |
| Adjusted OR - mean (SD)                                                    | 1.12 (0.30)                            | 1                         |
| - median (95% CrI)                                                         | 1.08 (0.64 - 1.78)                     | 1                         |
| Probability of superiority to no hydrocortisone, %                         | 61                                     | -                         |
| Model restricted to participants enrolled in Corticosteroid Domain (n=379) |                                        |                           |
| Adjusted OR - mean (SD)                                                    | 1.21 (0.34)                            | 1                         |
| - median (95% CrI)                                                         | 1.17 (0.67 - 2.00)                     | 1                         |
| Probability of superiority to no hydrocortisone, %                         | 71                                     | -                         |

The analyses of both organ support-free days (OSFDs) and in-hospital mortality using data from all participants enrolled in the trial who met COVID-19 severe state criteria and were randomized within at least one domain (n=576) adjusted for age, sex, time period, site, region, domain and intervention eligibility and intervention assignment (see COVID-19 Corticosteroid Domain SAP in [Supplement 1](#) and full report from Statistical Analysis Committee in eAppendix 3 of [Supplement 2](#)).

The analyses of both OSFDs and in-hospital mortality restricted to participants enrolled in the Corticosteroid Domain (n=379) did not include information on assignment to interventions other than hydrocortisone. Definitions of OSFDs and other outcomes are provided in Methods and the study protocol (see [Supplement 1](#)). Models are structured such that a higher OR is favorable.

SD - standard deviation; CrI - credible interval; OR - odds ratio.

eTable 3. Secondary Analyses of In-hospital Mortality

| Analysis                                                                                                                    | Fixed Dose Hydrocortisone (N=137) | Shock-dependent Hydrocortisone (N=141) | No Hydrocortisone (N=101) |
|-----------------------------------------------------------------------------------------------------------------------------|-----------------------------------|----------------------------------------|---------------------------|
| Model restricted to participants enrolled in Corticosteroid Domain (n=379)                                                  |                                   |                                        |                           |
| Adjusted OR - mean (SD)                                                                                                     | 1.17 (0.37)                       | 1.26 (0.41)                            | 1                         |
| - median (95% CrI)                                                                                                          | 1.11 (0.60 - 2.05)                | 1.19 (0.65 - 2.21)                     | 1                         |
| Probability of superiority to no hydrocortisone, %                                                                          | 64                                | 71                                     | -                         |
| Model restricted to participants enrolled in Corticosteroid Domain, excluding those ruled out (n=89) for COVID-19 (n=290)   |                                   |                                        |                           |
| Adjusted OR - mean (SD)                                                                                                     | 1.05 (0.36)                       | 1.21 (0.44)                            | 1                         |
| - median (95% CrI)                                                                                                          | 0.99 (0.50 - 1.90)                | 1.13 (0.56 - 2.29)                     | 1                         |
| Probability of superiority to no hydrocortisone, %                                                                          | 49                                | 64                                     | -                         |
| Model restricted to participants enrolled in Corticosteroid Domain, with removal of site and time period from model (n=379) |                                   |                                        |                           |
| Adjusted OR - mean (SD)                                                                                                     | 1.22 (0.35)                       | 1.45 (0.42)                            | 1                         |
| - median (95% CrI)                                                                                                          | 1.17 (0.67 - 2.03)                | 1.39 (0.80 - 2.43)                     | 1                         |
| Probability of superiority to no hydrocortisone, %                                                                          | 71                                | 88                                     | -                         |

The analyses of in-hospital mortality restricted to participants enrolled in the Corticosteroid Domain (n=379) did not include information on assignment to interventions other than hydrocortisone. Models are structured such that a higher OR is favorable.

SD - standard deviation; CrI - credible interval; OR - odds ratio.

**eAppendix 3.** Technical Report from the Statistical Analysis Committee for SAP Outcome Analyses  
15.1-4

# REMAP-CAP (REMAP-COVID)

## Analysis of the Corticosteroid Domain

August 14, 2020

---

### Contents

|          |                                                        |           |
|----------|--------------------------------------------------------|-----------|
| <b>1</b> | <b>Introduction</b>                                    | <b>2</b>  |
| 1.1      | Overview of the Adaptive Design .....                  | 2         |
| 1.2      | Purpose of this Report .....                           | 2         |
| 1.3      | Endpoints .....                                        | 2         |
| 1.3.1    | Primary Endpoint: Organ-Support Free-Days (OSFD) ..... | 2         |
| 1.3.2    | Secondary Endpoint: In-Hospital Mortality .....        | 2         |
| 1.4      | Vocabulary .....                                       | 2         |
| 1.5      | Current Trial Status .....                             | 3         |
| 1.6      | Analysis Population .....                              | 5         |
| <b>2</b> | <b>Data Summaries</b>                                  | <b>6</b>  |
| 2.1      | Overview of Descriptive Data Summaries .....           | 6         |
| 2.2      | Overall Data Summaries .....                           | 7         |
| 2.3      | Corticosteroid Domain .....                            | 7         |
| 2.3.1    | Description of the Corticosteroid domain .....         | 7         |
| 2.3.2    | Observed data within the Corticosteroids domain .....  | 8         |
| <b>3</b> | <b>Analysis Results and Conclusions</b>                | <b>9</b>  |
| 3.1      | Definition of Statistical Triggers .....               | 9         |
| 3.2      | Analyses pooling the fixed duration steroid arms ..... | 9         |
| 3.2.1    | Organ-Support Free Days .....                          | 10        |
| 3.2.2    | In-hospital Mortality .....                            | 11        |
| 3.3      | Analyses pooling all active steroid arms .....         | 13        |
| 3.3.1    | Organ-Support Free Days .....                          | 13        |
| 3.3.2    | In-hospital Mortality .....                            | 14        |
| <b>4</b> | <b>Other Data Summaries</b>                            | <b>15</b> |
| <b>5</b> | <b>Analysis Conventions</b>                            | <b>19</b> |
| <b>6</b> | <b>Model Stability</b>                                 | <b>20</b> |
| <b>7</b> | <b>Report Production</b>                               | <b>20</b> |

# 1 Introduction

## 1.1 Overview of the Adaptive Design

This trial is a Randomized, Embedded, Multifactorial Adaptive Platform (REMAP) trial that was originally designed to investigate treatments for Community-Acquired Pneumonia (CAP). The platform trial has the ability to investigate multiple interventions within multiple domains, across different patient strata. The number of interventions, domains, and strata may increase or decrease as the trial progresses. The platform trial includes a pandemic stratum that was activated when COVID-19 emerged. The pandemic stratum-specific protocol details are provided in a Pandemic Appendix to the Core (PAtC) protocol. The PAtC investigates therapies for patients with pandemic infection that are classified as suspected or proven (PISOP). This report focuses on the COVID-19 PISOP stratum.

For the PISOP stratum, patients may be randomized to interventions while they are in a Severe disease state or a Moderate disease state. State definitions are in the PAtC. Patients initially randomized in a Moderate state may progress in their disease severity, and subsequently meet the criteria for Severe state, and have additional randomization and reveal of interventions for Severe state domains.

## 1.2 Purpose of this Report

The international trial steering committee (ITSC) closed randomization to the corticosteroid domain within the PISOP stratum on June 17, 2020 and started a process for reporting results. This decision was made following the release of the RECOVERY trial results on June 16, 2020 which reported strong positive effects of dexamethasone in moderate and severe patients. The ITSC prepared a statistical analysis plan (SAP) for the corticosteroid domain (Version 1.0) and provided this to the Statistical Analysis Committee (SAC) on July 21, 2020. Although the ITSC will be unblinded to the corticosteroid domain, they will not be unblinded to the other domains to which the patients have been randomized. The fully unblinded SAC will conduct the set of the analyses that use the full statistical model including data from all domains in the PISOP stratum. This report summarizes the data and the results for the corticosteroid domain resulting from the analyses using the full statistical model. This report is restricted to only summarize the results pertaining to the corticosteroid domain. Summaries for other domains are contained in a separate unblinded report only viewed by the SAC and DSMB.

## 1.3 Endpoints

### 1.3.1 Primary Endpoint: Organ-Support Free-Days (OSFD)

The primary endpoint for the analysis is a composite endpoint that comprises the number of whole study days for which the patient is alive and not receiving organ support in an ICU up until the end of study day 21. All patients who die before discharge from an acute hospital, irrespective of whether this occurs before or after day 21, will be coded as -1. All patients who receive no organ support in an ICU will be coded as 22 days. An outcome of 22 days is not possible for patients in Severe state.

### 1.3.2 Secondary Endpoint: In-Hospital Mortality

The secondary endpoint is a dichotomous endpoint of in-hospital mortality where the death component corresponds to -1 on the OSFD endpoint.

## 1.4 Vocabulary

- **Domain:** a specific set of competing alternative interventions within a common clinical mode



- **Intervention:** is a treatment option that is subject to variation in clinical practice (comparative effectiveness intervention) or has been proposed for introduction into clinical practice (experimental intervention) and also is being subjected to experimental manipulation within the design of a REMAP.
- **Regimen:** Each patient is assigned a single intervention from each domain. The regimen is the combination of assigned interventions across the domains.
- **Immediate Reveal Domain:** is one for which all participants are eligible, the allocation status is made known, and the intervention is initiated at the time of randomization.
- **Delayed Reveal Domain:** is one for which all participants received a randomization assignment, but the allocation status is only made known and the intervention initiated if and when eligibility occurs. This occurs for example, when a domain is appropriate only for patients in a certain disease state and the patient transitions to that disease state.
- **Deferred Reveal Domain:** is one for which patients receive a randomization assignment and the allocation status is made known based on eligibility criterion known at the time of randomization, but additional information to assess that eligibility becomes known after some time. This occurs for example, when a test results confirming an eligibility criterion are returned after some time.
- **Nest:** A grouping of interventions within a domain that are modeled hierarchically in order to allow for borrowing among the interventions effect estimates.
- **State:** Defined by the disease characteristics of the patient and may change over time as the disease progresses. States are used to define eligibility for certain domains.

## 1.5 Current Trial Status

The data transfers provided to the SAC (see Section 7 for details) include patients randomized through August 11, 2020 from the combined Spiral and Research Online databases, and patients randomized through June 25, 2020 from the UPMC database. This data include:

- 1340 patients randomized in the REMAP-CAP/REMAP-COVID trial, with:
  - 786 randomized, consented patients with pandemic infection suspected or proven (PISOP),
  - 554 randomized, consented patients with pandemic infection neither suspected nor proven (PIN-SNP).

These counts exclude patients that withdrew consent for the use of their data in the analysis.

Figure 1.1 gives an overview of the interventions, domains, and strata currently being investigated in the COVID-19 pandemic portion of the trial. Each intervention is represented by a colored box, with similar colors used for interventions within the same domain. The figure also indicates features of the statistical model. For example, interactions are represented with an arrow and star (\*). Within a domain, interventions that are nested within a hierarchical model are grouped within a curly bracket. Interventions that are closed to enrollment are indicated by an “X”.

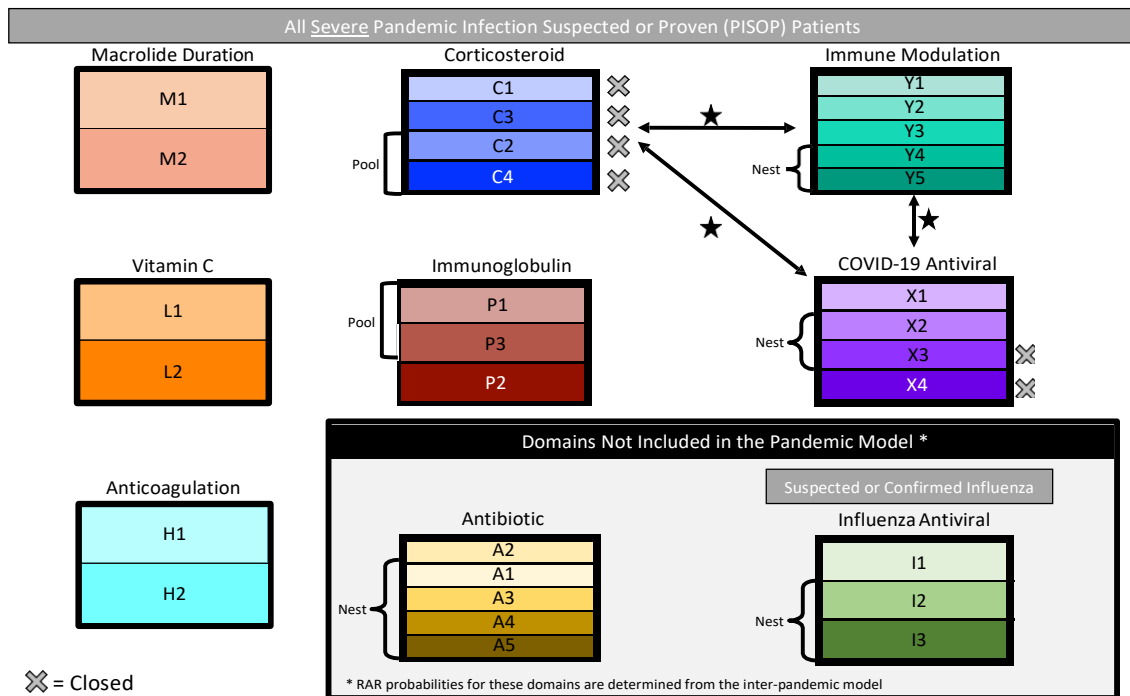

**Figure 1.1:** Current state of the pandemic REMAP-CAP domains, interventions, and strata. Each colored box represents an intervention, grouped by domain, with similar colors used for interventions within the same domain. Domains connected with an arrow and indicated with a star (\*) will have interaction terms fit between the interventions in those domains. Within a domain, interventions that are grouped with a curly bracket are part of a nest whose main effects are estimated with a hierarchical model. Interventions that are closed to enrollment are indicated by an “X”

**Table 1.1:** List of all interventions to which a patient may be allocated.

| Code                                        | Intervention                             |
|---------------------------------------------|------------------------------------------|
| <b>Antibiotic</b>                           |                                          |
| A1                                          | Ceftriaxone + Macrolide                  |
| A2                                          | Moxifloxacin or Levofloxacin             |
| A3                                          | Piperacillin-Tazobactam + Macrolide      |
| A4                                          | Ceftaroline + Macrolide                  |
| A5                                          | Amoxicillin-Clavulanate + Macrolide      |
| <b>Macrolide Duration</b>                   |                                          |
| M1                                          | Standard course (3 to 5 days)            |
| M2                                          | Extended course (14 days)                |
| <b>Corticosteroid</b>                       |                                          |
| C1                                          | No corticosteroids                       |
| C2                                          | Hydrocortisone (50mg)                    |
| C3                                          | Shock dependent hydrocortisone           |
| C4                                          | High-dose hydrocortisone (100mg)         |
| <b>Antiviral</b>                            |                                          |
| I1                                          | No antiviral                             |
| I2                                          | Oseltamivir 5 days                       |
| I3                                          | Oseltamivir 10 days                      |
| <b>COVID-19 Antiviral</b>                   |                                          |
| X1                                          | No antiviral for COVID-19                |
| X2                                          | Lopinavir/ritonavir                      |
| X3                                          | Hydroxychloroquine                       |
| X4                                          | Hydroxychloroquine + lopinavir/ritonavir |
| <b>COVID-19 Immune Modulation</b>           |                                          |
| Y1                                          | No immune modulation for COVID-19        |
| Y2                                          | Interferon-Beta-1a                       |
| Y3                                          | Anakinra                                 |
| Y4                                          | Tocilizumab                              |
| Y5                                          | Sarilumab                                |
| <b>COVID-19 Immunoglobulin</b>              |                                          |
| P1                                          | No Immunoglobulin against COVID-19       |
| P2                                          | Convalescent plasma                      |
| P3                                          | Delayed convalescent plasma              |
| <b>COVID-19 Therapeutic Anticoagulation</b> |                                          |
| H1                                          | Standard practice thromboprophylaxis     |
| H2                                          | Therapeutic anticoagulation              |
| <b>Vitamin C</b>                            |                                          |
| L1                                          | No vitamin C                             |
| L2                                          | Vitamin C                                |

## 1.6 Analysis Population

The SAP for the corticosteroid analysis restricts the analysis population to consented patients randomized on or before June 17, 2020, i.e. the day randomization to the PISOP corticosteroid domain was halted. The SAP further restricts the analysis population to patients in Severe disease state, which includes both patients randomized for the first time while in Severe state and also patients randomized in Moderate state that progressed to Severe state with randomized assignments for Severe state domains revealed on or before June 17, 2020. The patient population breakdown is as follows:

- 786 PISOP consented patients randomized on or before June 17, 2020
  - 587 PISOP consented patients randomized to at least one domain in Severe state on or before June 17, 2020
    - 576 PISOP consented patients randomized to at least one domain in Severe state on or before June 17, 2020 for whom 21 days have elapsed since randomization and there is a known outcome on the 21-day organ-support free-days endpoint

- 384 PISOP consented patients randomized to the corticosteroid domain in Severe state on or before June 17, 2020
  - 379 PISOP consented patients randomized to the corticosteroid domain in Severe state on or before June 17, 2020 for whom 21 days have elapsed since randomization and there is a known outcome on the 21-day organ-support free-days endpoint

These counts includes 5 patients who were initially randomized while in Moderate State and later progressed to Severe State with randomized assignments for Severe state domains revealed on or before June 17, 2020.

## 2 Data Summaries

### 2.1 Overview of Descriptive Data Summaries

The following summaries are provided within the corticosteroid domain:

#### Summary of the availability of data:

- **Number Eligible:** Eligibility is assessed both at the domain level and the intervention level. We tabulate the number of patients eligible for the domain, and within each category of domain eligibility, the number of patients eligible for each intervention. Eligibility captures both the patient meeting the inclusion criteria, and the domain or intervention being available and active at their site.
- **Number Assigned:** We tabulate the number of patients assigned to each intervention, by eligibility category. No randomized assignment can be given when a patient is ineligible for a domain, or when a patient is eligible for only one intervention within a domain. A patient must be eligible for at least two interventions within a domain to receive a randomized assignment.
- **Number Revealed:** Among the patients eligible and assigned to each intervention, we tabulate the number of patients whose assignment was revealed. Reveal means that the randomization assignment was made known and the patient then commences treatment according to their assigned intervention.
- **Number Past 21 Days:** Among the patients eligible and assigned to each intervention, we tabulate the number of patients who have had the opportunity to complete the 21 days of follow-up for the primary endpoint. A patient must have been in the trial at least 21 days to be included in the analysis.
- **Number Missing:** Among the patients eligible and assigned to each intervention, we tabulate the number of patients who have completed 21 days of follow-up but do not have an outcome available on the primary endpoint.
- **Number Known:** Among the patients eligible and assigned to each intervention, we tabulate the number of patients who have completed 21 days of follow-up and have a known outcome on the primary endpoint.

#### Summary of the observed data:

For patients that are eligible for the domain and assigned to an intervention, we repeat the tabulation of the number of patients assigned to an intervention and with a known outcome on the 21-day endpoint. Additionally, we provide summaries of the following:

- **Number Deaths:** The number of in-hospital deaths, where the death corresponds to 1 on the OSFD endpoint.
- **Mortality Rate:** We calculate the observed in-hospital mortality rate as the number of in-hospital deaths out of the total number of patients with a known 21-day outcome.

- **OSFD median (IQR):** Among the patients with a known 21-day outcome, we compute the 25th, 50th, and 75th percentiles of the Organ-Support Free-Days endpoint. The interquartile range (IQR) is shown in parentheses as the range between the 25th and 75th percentiles.
- **Conditional OSFD:** Among the patients with a known 21-day outcome that were not deceased, we compute the 25th, 50th, and 75th percentiles of the Organ-Support Free-Days endpoint. The interquartile range (IQR) is shown in parentheses as the range between the 25th and 75th percentiles.

## 2.2 Overall Data Summaries

Figure 2.1 displays the distribution of outcomes on the primary endpoint for all patients in the analysis population (including all domains), without respect to treatment assignments. Table 2.1 provides descriptive summaries of the OSFD and in-hospital mortality outcomes for all patients in the analysis population and for all patients in the corticosteroid domain.

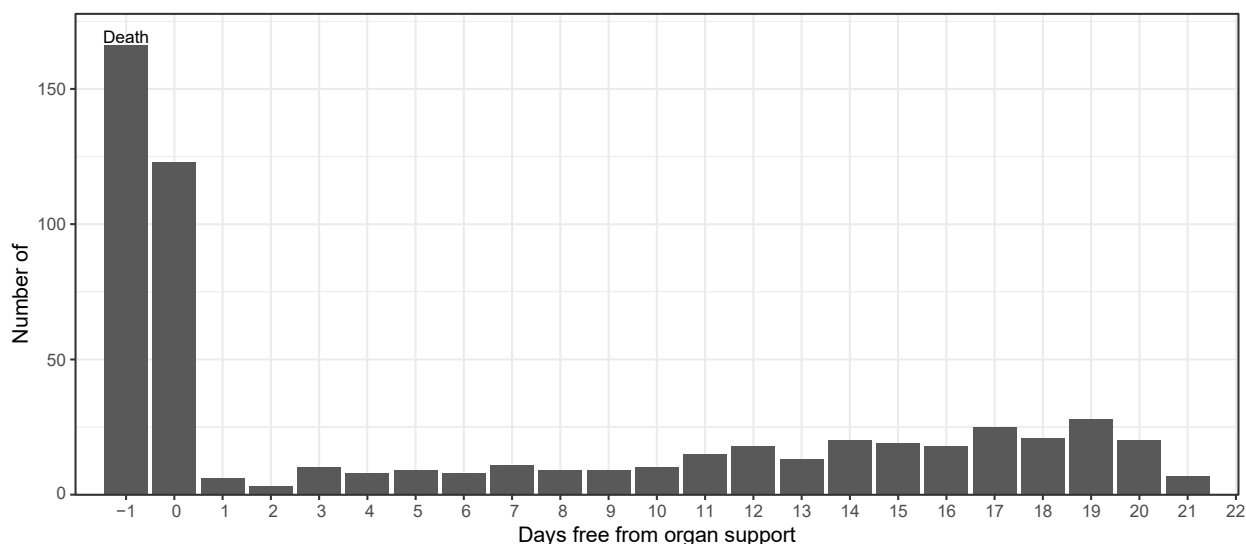

**Figure 2.1:** Overall distribution of the primary organ support free days endpoint.

**Table 2.1:** Overall summary of the OSFD and In-Hospital mortality data

| Participant Group     | Number Assigned (N) | Number Known (n) | Number Deaths (y) | Mortality Rate (y/n) | OSFD median (IQR)    | Conditional* OSFD median (IQR) |
|-----------------------|---------------------|------------------|-------------------|----------------------|----------------------|--------------------------------|
| COVID Severe State    | 587                 | 576              | 166               | 0.288                | 0.00 (-1.00 - 14.00) | 10.00 (0.00 - 16.00)           |
| Corticosteroid Domain | 384                 | 379              | 111               | 0.293                | 0.00 (-1.00 - 13.00) | 9.00 (0.00 - 16.00)            |

\* Conditional OSFD reports the median and IQR for subjects that did not die.

## 2.3 Corticosteroid Domain

### 2.3.1 Description of the Corticosteroid domain

The corticosteroids domain includes 4 interventions. This domain:

- is an immediate reveal domain;
- is only available for patients in the Severe State stratum;

- has no strata identified as being of interest. Analyses and response adaptive randomization are applied to all randomized patients in Severe State;
- has possible interactions modeled with the COVID-19 antiviral domain and with the COVID-19 immune modulation domain. A previous study suggested that the interaction of interferon- $\beta$  and corticosteroids may be harmful; therefore an informative prior is used to reflect a harmful interaction. Furthermore, initial (burn-in) randomization probabilities were constructed to limit the number of patients randomized to the combination of corticosteroids and interferon- $\beta$ ;
- was originally intended to have one nest, comprised of the 2 fixed duration corticosteroid interventions; Since very few patients were randomized to the high-dose corticosteroid intervention at the time that the domain was closed, the 2 fixed duration interventions will be pooled rather than nested in a hierarchical model.

### 2.3.2 Observed data within the Corticosteroids domain

In this section, we describe the data at the most granular level, prior to pooling arms together for analysis. Later sections of this report will show data summaries collapsing interventions for analysis.

**Table 2.2:** Summary of the availability of data (**Corticosteroid** domain)

| Intervention                                 | Number Eligible | Number Assigned | Number Revealed | Number Past Day 21 | Number Missing | Number Known |
|----------------------------------------------|-----------------|-----------------|-----------------|--------------------|----------------|--------------|
| <i>Eligible for domain: N=384</i>            |                 |                 |                 |                    |                |              |
| No corticosteroids                           | 314             | 101             | 101             | 101                | 0              | 101          |
| Hydrocortisone (50mg)                        | 375             | 135             | 135             | 135                | 0              | 135          |
| Shock dependent hydrocortisone               | 336             | 146             | 146             | 146                | 5              | 141          |
| High-dose hydrocortisone (100mg)             | 15              | 2               | 2               | 2                  | 0              | 2            |
| <i>Not eligible for domain: N=128</i>        |                 |                 |                 |                    |                |              |
| No assignment                                |                 | 128             | 125             | 128                | 3              | 125          |
| <i>Domain not active/not available: N=75</i> |                 |                 |                 |                    |                |              |
| No assignment                                |                 | 75              | 75              | 75                 | 3              | 72           |

**Table 2.3:** Summary of the OSFD and In-Hospital mortality data for patients that were eligible for the **Corticosteroid** domain

| Intervention                     | Number Assigned (N) | Number Known (n) | Number Deaths (y) | Mortality Rate (y/n) | OSFD median (IQR)    | Conditional* OSFD median (IQR) |
|----------------------------------|---------------------|------------------|-------------------|----------------------|----------------------|--------------------------------|
| No corticosteroids               | 101                 | 101              | 33                | 0.327                | 0.00 (-1.00 - 11.00) | 6.00 (0.00 - 12.00)            |
| Hydrocortisone (50mg)            | 135                 | 135              | 41                | 0.304                | 0.00 (-1.00 - 15.00) | 12.50 (0.00 - 17.00)           |
| Shock dependent hydrocortisone   | 146                 | 141              | 37                | 0.262                | 0.00 (-1.00 - 13.00) | 9.50 (0.00 - 16.00)            |
| High-dose hydrocortisone (100mg) | 2                   | 2                | 0                 | 0.000                | 5.00 (2.50 - 7.50)   | 5.00 (2.50 - 7.50)             |

\* Conditional OSFD reports the median and IQR for subjects that did not die.

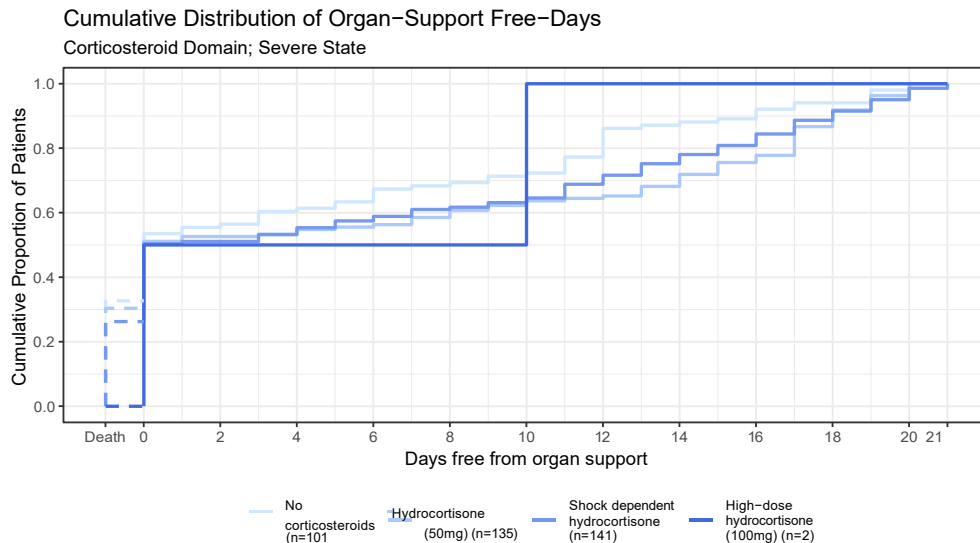

**Figure 2.2:** Empirical cumulative distribution of organ support free days for each intervention in the **Corticosteroid** domain. This plot is restricted to include only patients who were eligible for the domain.

### 3 Analysis Results and Conclusions

#### 3.1 Definition of Statistical Triggers

The adaptive design defines several statistical triggers within the trial, that at any analysis of the trial would result in public disclosure and a declaration of a platform conclusion. The following statistical triggers were defined for the corticosteroid domain:

1. **Domain Superiority.** If a single intervention within the corticosteroid domain has at least a 99% posterior probability of being in the best regimen for patients in the severe state of the PISOP stratum, this would trigger domain superiority of that intervention.
2. **Intervention Efficacy.** If an intervention is deemed to have at least a 99% posterior probability of being superior to the control, then a declaration of efficacy of that intervention would be declared. This statistical trigger is active for each of the non-control arms in the corticosteroid domain.
3. **Intervention Equivalence.** If two non-control interventions have a 90% probability of equivalence, this would trigger a public disclosure of intervention equivalence.
4. **Intervention Futility.** Because the domain has been stopped no analyses for futility will be conducted.

Per communication in the corticosteroids SAP, the primary and secondary OSFD analyses and primary and secondary mortality analyses for the corticosteroid domain do not include formal, intervention-specific futility and inferiority assessments and are not part of the pre-specified result summaries. However, for informational purposes, we do include the futility and inferiority evaluations for the corticosteroid domain interventions as specified in the original statistical analysis plan.

#### 3.2 Analyses pooling the fixed duration steroid arms

For these analyses, the high-dose 7-day hydrocortisone arm will be combined with the 7-day hydrocortisone arm (fixed duration). These interventions were originally intended to be nested within a hierarchical model,

which allowed pooling, and there were very few patients randomized to the high-dose 7-day hydrocortisone arm. Table 3.1 summarizes the observed data on the OSFD and in-hospital mortality endpoints for the combined arms for patients that were eligible for the corticosteroid domain.

**Table 3.1:** Summary of the OSFD and In-Hospital mortality data for patients that were eligible for the **Corticosteroid** domain (pooling the fixed duration steroid arms)

| Intervention                   | Number Assigned (N) | Number Known (n) | Number Deaths (y) | Mortality Rate (y/n) | OSFD median (IQR)    | Conditional* OSFD median (IQR) |
|--------------------------------|---------------------|------------------|-------------------|----------------------|----------------------|--------------------------------|
| No corticosteroids             | 101                 | 101              | 33                | 0.327                | 0.00 (-1.00 - 11.00) | 6.00 (0.00 - 12.00)            |
| Fixed duration hydrocortisone  | 137                 | 137              | 41                | 0.299                | 0.00 (-1.00 - 15.00) | 11.50 (0.00 - 17.00)           |
| Shock dependent hydrocortisone | 146                 | 141              | 37                | 0.262                | 0.00 (-1.00 - 13.00) | 9.50 (0.00 - 16.00)            |

\* Conditional OSFD reports the median and IQR for subjects that did not die.

### 3.2.1 Organ-Support Free Days

**Table 3.2:** Model-estimated Odds-Ratios for the **OSFD** endpoint (Model pooling the fixed duration steroid arms)

| Odds-Ratio Parameter                                             | Mean (SD)   | Median | 95% Credible Interval |
|------------------------------------------------------------------|-------------|--------|-----------------------|
| Age ≤ 39                                                         | 3.01 (0.93) | 2.87   | 1.63 - 5.21           |
| Age 40 - 49                                                      | 2.19 (0.56) | 2.12   | 1.31 - 3.48           |
| Age 50 - 59                                                      | 1.43 (0.29) | 1.41   | 0.95 - 2.08           |
| Age 70 - 79                                                      | 0.41 (0.10) | 0.40   | 0.25 - 0.63           |
| Age ≥ 80                                                         | 0.63 (0.28) | 0.57   | 0.24 - 1.32           |
| Female                                                           | 1.23 (0.21) | 1.21   | 0.87 - 1.70           |
| Time Bucket 1                                                    | 0.91 (0.10) | 0.91   | 0.73 - 1.11           |
| Time Bucket 2                                                    | 0.85 (0.16) | 0.84   | 0.56 - 1.19           |
| Time Bucket 3                                                    | 0.86 (0.22) | 0.84   | 0.52 - 1.36           |
| Time Bucket 4                                                    | 0.89 (0.28) | 0.85   | 0.46 - 1.55           |
| Time Bucket 5                                                    | 0.98 (0.42) | 0.91   | 0.40 - 2.06           |
| Fixed duration hydrocortisone                                    | 1.47 (0.35) | 1.43   | 0.91 - 2.27           |
| Shock dependant hydrocortisone                                   | 1.26 (0.31) | 1.22   | 0.76 - 1.94           |
| Fixed duration hydrocortisone vs. Shock dependant hydrocortisone | 1.20 (0.28) | 1.17   | 0.75 - 1.83           |

*Note:* For Age, Odds-Ratio is relative to the Age 60-90 category. Time bucket X is the Xth 2-week interval prior to the most recent month, and Odds-Ratios are relative to the most recent month.

**Table 3.3:** Summary of posterior probabilities for the **OSFD** endpoint in the **Corticosteroid** domain (Model pooling the fixed duration steroid arms)

| Intervention                   | Pr(in Optimal) | Pr(OR > 1) | Pr(OR > 1.2) | Pr(Equivalent)<br>Shock dependent hydrocortisone |
|--------------------------------|----------------|------------|--------------|--------------------------------------------------|
| No corticosteroids             | 0.1090         |            |              |                                                  |
| Fixed duration hydrocortisone  | 0.5466         | 0.9346     | 0.7744       | 0.4761                                           |
| Shock dependent hydrocortisone | 0.3444         | 0.8013     | 0.5253       |                                                  |



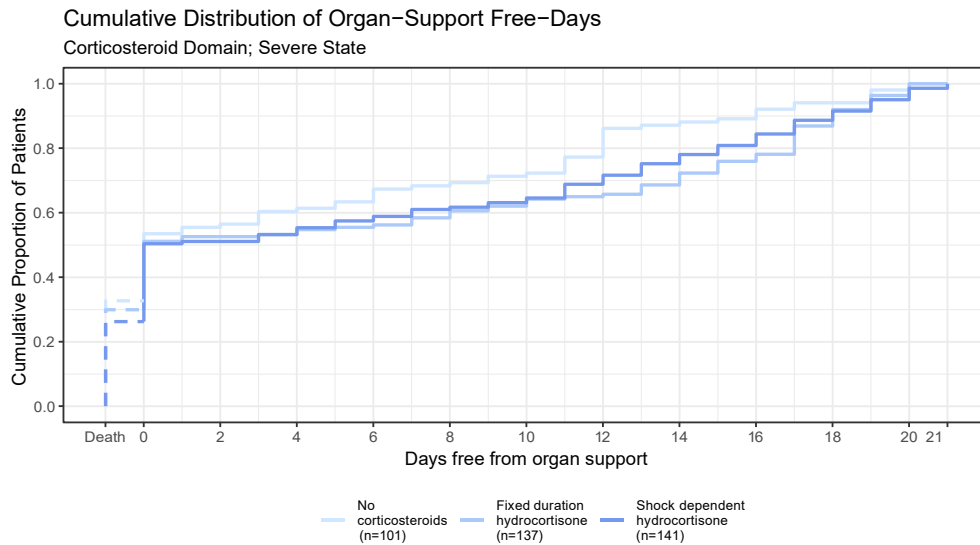

**Figure 3.1:** Empirical cumulative distribution of organ support free days for each intervention in the **Corticosteroid** domain. This plot is restricted to include only patients who were eligible for the domain.

**Table 3.4:** Evaluation of Statistical Triggers for the **OSFD** endpoint in the **Corticosteroid** Domain (Model pooling the fixed duration steroid arms)

| Decision Quantity   | Value  | Direction | Threshold | Conclusion |
|---------------------|--------|-----------|-----------|------------|
| <b>Efficacy</b>     |        |           |           |            |
| Pr(OR for C2 > 1)   | 0.9346 | >         | 0.990     | None       |
| Pr(OR for C3 > 1)   | 0.8013 | >         | 0.990     | None       |
| <b>Equivalence</b>  |        |           |           |            |
| Pr(C2 equiv C3)     | 0.4761 | >         | 0.900     | None       |
| <b>Futility</b>     |        |           |           |            |
| Pr(OR for C2 > 1.2) | 0.7744 | <         | 0.050     | None       |
| Pr(OR for C3 > 1.2) | 0.5253 | <         | 0.050     | None       |
| <b>Inferiority</b>  |        |           |           |            |
| Pr(C1 in optimal)   | 0.1090 | <         | 0.005     | None       |
| Pr(C2 in optimal)   | 0.5466 | <         | 0.005     | None       |
| Pr(C3 in optimal)   | 0.3444 | <         | 0.005     | None       |
| <b>Superiority</b>  |        |           |           |            |
| Pr(C2 in optimal)   | 0.5466 | >         | 0.990     | None       |
| Pr(C3 in optimal)   | 0.3444 | >         | 0.990     | None       |

C1 = No corticosteroids; C2 = Fixed duration hydrocortisone; C3 = Shock dependent hydrocortisone

### 3.2.2 In-hospital Mortality

**Table 3.5:** Model-estimated Odds-Ratios for the **Mortality** endpoint (Model pooling the fixed duration steroid arms)

| Odds-Ratio<br>Parameter                                             | Mean (SD)     | Median | 95% Credible<br>Interval |
|---------------------------------------------------------------------|---------------|--------|--------------------------|
| Age ≤ 39                                                            | 20.18 (15.37) | 15.72  | 5.20 –60.56              |
| Age 40 – 49                                                         | 4.37 (1.99)   | 3.92   | 1.83 –9.48               |
| Age 50 – 59                                                         | 2.68 (0.79)   | 2.57   | 1.45 –4.56               |
| Age 70 – 79                                                         | 0.28 (0.08)   | 0.27   | 0.16 –0.46               |
| Age ≥ 80                                                            | 0.37 (0.20)   | 0.33   | 0.12 –0.88               |
| Female                                                              | 1.06 (0.26)   | 1.03   | 0.65 –1.64               |
| Time Bucket 1                                                       | 0.97 (0.12)   | 0.96   | 0.75 –1.21               |
| Time Bucket 2                                                       | 0.94 (0.24)   | 0.93   | 0.51 –1.45               |
| Time Bucket 3                                                       | 1.07 (0.35)   | 1.03   | 0.50 –1.87               |
| Time Bucket 4                                                       | 1.37 (0.58)   | 1.27   | 0.55 –2.79               |
| Time Bucket 5                                                       | 2.12 (1.45)   | 1.75   | 0.60 –5.72               |
| Fixed duration hydrocortisone                                       | 1.08 (0.37)   | 1.03   | 0.53 –1.95               |
| Shock dependant hydrocortisone                                      | 1.16 (0.40)   | 1.10   | 0.58 –2.11               |
| Fixed duration hydrocortisone vs.<br>Shock dependant hydrocortisone | 0.98 (0.34)   | 0.93   | 0.48 –1.78               |

*Note:* For Age, Odds-Ratio is relative to the Age 60-90 category. Time bucket X is the Xth 2-week interval prior to the most recent month, and Odds-Ratios are relative to the most recent month.

**Table 3.6:** Summary of posterior probabilities for the **Mortality** endpoint in the **Corticosteroid** domain (Model pooling the fixed duration steroid arms)

| Intervention                   | Pr(in Optimal) | Pr(OR > 1) | Pr(OR > 1.2) | Pr(Equivalent)                       |
|--------------------------------|----------------|------------|--------------|--------------------------------------|
|                                |                |            |              | Shock<br>dependent<br>hydrocortisone |
| No corticosteroids             | 0.241          |            |              |                                      |
| Fixed duration hydrocortisone  | 0.294          | 0.5353     | 0.3155       | 0.4208                               |
| Shock dependent hydrocortisone | 0.465          | 0.6165     | 0.3943       |                                      |

**Table 3.7:** Evaluation of Statistical Triggers for the **Mortality** endpoint in the **Corticosteroid** Domain (Model pooling the fixed duration steroid arms)

| Decision Quantity   | Value  | Direction | Threshold | Conclusion |
|---------------------|--------|-----------|-----------|------------|
| <b>Efficacy</b>     |        |           |           |            |
| Pr(OR for C2 > 1)   | 0.5353 | >         | 0.990     | None       |
| Pr(OR for C3 > 1)   | 0.6165 | >         | 0.990     | None       |
| <b>Equivalence</b>  |        |           |           |            |
| Pr(C2 equiv C3)     | 0.4208 | >         | 0.900     | None       |
| <b>Futility</b>     |        |           |           |            |
| Pr(OR for C2 > 1.2) | 0.3155 | <         | 0.050     | None       |
| Pr(OR for C3 > 1.2) | 0.3943 | <         | 0.050     | None       |
| <b>Inferiority</b>  |        |           |           |            |
| Pr(C1 in optimal)   | 0.2410 | <         | 0.005     | None       |
| Pr(C2 in optimal)   | 0.2940 | <         | 0.005     | None       |
| Pr(C3 in optimal)   | 0.4650 | <         | 0.005     | None       |
| <b>Superiority</b>  |        |           |           |            |
| Pr(C2 in optimal)   | 0.2940 | >         | 0.990     | None       |
| Pr(C3 in optimal)   | 0.4650 | >         | 0.990     | None       |

C1 = No corticosteroids; C2 = Fixed duration hydrocortisone; C3 = Shock dependent hydrocortisone

### 3.3 Analyses pooling all active steroid arms

For these analyses, the fixed duration hydrocortisone arms and the shock-dependent hydrocortisone arm will be combined. Table 3.8 summarizes the observed data on the OSFD and in-hospital mortality endpoints for the combined arms for patients that were eligible for the corticosteroid domain.

**Table 3.8:** Summary of the OSFD and In-Hospital mortality data for patients that were eligible for the **Corticosteroid** domain (pooling all active steroid arms)

| Intervention       | Number Assigned (N) | Number Known (n) | Number Deaths (y) | Mortality Rate (y/n) | OSFD median (IQR)    | Conditional* OSFD median (IQR) |
|--------------------|---------------------|------------------|-------------------|----------------------|----------------------|--------------------------------|
| No corticosteroids | 101                 | 101              | 33                | 0.327                | 0.00 (-1.00 - 11.00) | 6.00 (0.00 - 12.00)            |
| Any steroid        | 283                 | 278              | 78                | 0.281                | 0.00 (-1.00 - 14.00) | 10.00 (0.00 - 17.00)           |

\* Conditional OSFD reports the median and IQR for subjects that did not die.

#### 3.3.1 Organ-Support Free Days

**Table 3.9:** Model-estimated Odds-Ratios for the **OSFD** endpoint (Model pooling all active steroid arms)

| Odds-Ratio Parameter | Mean (SD)   | Median | 95% Credible Interval |
|----------------------|-------------|--------|-----------------------|
| Age ≤ 39             | 2.98 (0.89) | 2.84   | 1.63 - 5.10           |
| Age 40 - 49          | 2.19 (0.56) | 2.13   | 1.29 - 3.47           |
| Age 50 - 59          | 1.43 (0.28) | 1.41   | 0.95 - 2.05           |
| Age 70 - 79          | 0.41 (0.10) | 0.40   | 0.25 - 0.62           |
| Age ≥ 80             | 0.62 (0.28) | 0.56   | 0.23 - 1.31           |
| Female               | 1.22 (0.21) | 1.20   | 0.87 - 1.68           |
| Time Bucket 1        | 0.91 (0.09) | 0.91   | 0.73 - 1.11           |
| Time Bucket 2        | 0.84 (0.16) | 0.83   | 0.55 - 1.17           |
| Time Bucket 3        | 0.85 (0.21) | 0.82   | 0.51 - 1.31           |
| Time Bucket 4        | 0.87 (0.27) | 0.83   | 0.45 - 1.51           |
| Time Bucket 5        | 0.96 (0.40) | 0.88   | 0.41 - 1.97           |
| Any steroid          | 1.37 (0.29) | 1.34   | 0.88 - 2.02           |

*Note:* For Age, Odds-Ratio is relative to the Age 60-90 category. Time bucket X is the Xth 2-week interval prior to the most recent month, and Odds-Ratios are relative to the most recent month.

**Table 3.10:** Summary of posterior probabilities for the **OSFD** endpoint in the **Corticosteroid** domain (Model pooling all active steroid arms)

| Intervention       | Pr(in Optimal) | Pr(OR > 1) | Pr(OR > 1.2) |
|--------------------|----------------|------------|--------------|
| No corticosteroids | 0.2513         |            |              |
| Any steroid        | 0.7487         | 0.9121     | 0.7031       |

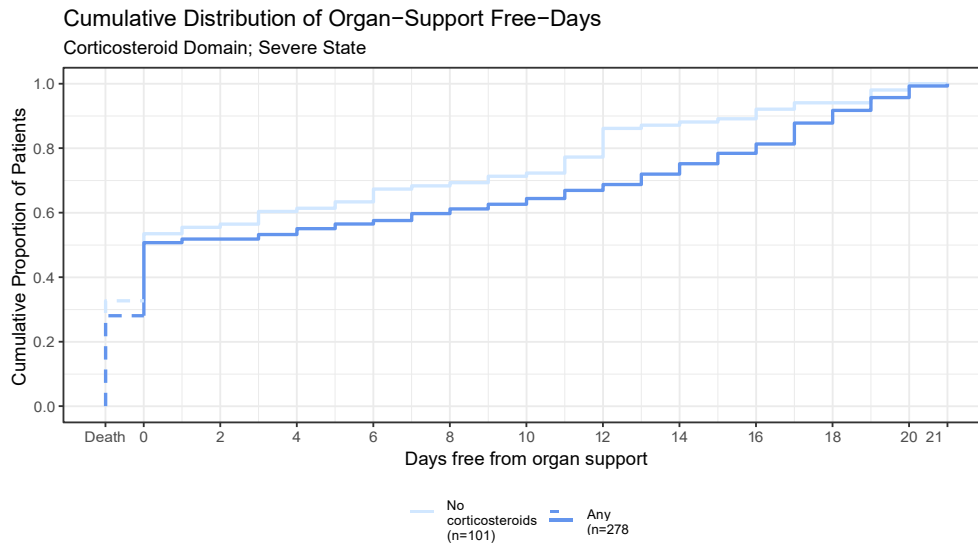

**Figure 3.2:** Empirical cumulative distribution of organ support free days for each intervention in the **Corticosteroid** domain. This plot is restricted to include only patients who were eligible for the domain.

**Table 3.11:** Evaluation of Statistical Triggers for the **OSFD** endpoint in the **Corticosteroid** Domain (Model pooling all active steroid arms)

| Decision Quantity   | Value  | Direction | Threshold | Conclusion |
|---------------------|--------|-----------|-----------|------------|
| <b>Efficacy</b>     |        |           |           |            |
| Pr(OR for C2 > 1)   | 0.9121 | >         | 0.99      | None       |
| <b>Futility</b>     |        |           |           |            |
| Pr(OR for C2 > 1.2) | 0.7031 | <         | 0.05      | None       |
| <b>Inferiority</b>  |        |           |           |            |
| Pr(C1 in optimal)   | 0.2513 | <         | 0.01      | None       |
| Pr(C2 in optimal)   | 0.7487 | <         | 0.01      | None       |
| <b>Superiority</b>  |        |           |           |            |
| Pr(C2 in optimal)   | 0.7487 | >         | 0.99      | None       |

C1 = No corticosteroids; C2 = Any steroid

### 3.3.2 In-hospital Mortality

**Table 3.12:** Model-estimated Odds-Ratios for the **Mortality** endpoint (Model pooling all active steroid arms)

| Odds-Ratio<br>Parameter | Mean (SD)     | Median | 95% Credible<br>Interval |
|-------------------------|---------------|--------|--------------------------|
| Age ≤ 39                | 19.09 (14.56) | 15.12  | 4.85 –57.52              |
| Age 40 – 49             | 4.55 (2.02)   | 4.12   | 1.92 –9.64               |
| Age 50 – 59             | 2.67 (0.78)   | 2.55   | 1.47 –4.50               |
| Age 70 – 79             | 0.28 (0.08)   | 0.27   | 0.16 –0.46               |
| Age ≥ 80                | 0.38 (0.20)   | 0.34   | 0.13 –0.90               |
| Female                  | 1.06 (0.26)   | 1.03   | 0.65 –1.67               |
| Time Bucket 1           | 0.95 (0.12)   | 0.94   | 0.73 –1.19               |
| Time Bucket 2           | 0.89 (0.21)   | 0.88   | 0.49 –1.34               |
| Time Bucket 3           | 0.99 (0.30)   | 0.95   | 0.51 –1.69               |
| Time Bucket 4           | 1.24 (0.49)   | 1.16   | 0.55 –2.45               |
| Time Bucket 5           | 1.92 (1.33)   | 1.57   | 0.55 –5.23               |
| Any steroid             | 1.12 (0.30)   | 1.08   | 0.64 –1.78               |

*Note:* For Age, Odds-Ratio is relative to the Age 60-90 category. Time bucket X is the Xth 2-week interval prior to the most recent month, and Odds-Ratios are relative to the most recent month.

**Table 3.13:** Summary of posterior probabilities for the **Mortality** endpoint in the **Corticosteroid** domain (Model pooling all active steroid arms)

| Intervention       | Pr(in Optimal) | Pr(OR > 1) | Pr(OR > 1.2) |
|--------------------|----------------|------------|--------------|
| No corticosteroids | 0.4167         |            |              |
| Any steroid        | 0.5833         | 0.6117     | 0.3476       |

**Table 3.14:** Evaluation of Statistical Triggers for the **Mortality** endpoint in the **Corticosteroid** Domain (Model pooling all active steroid arms)

| Decision Quantity   | Value  | Direction | Threshold | Conclusion |
|---------------------|--------|-----------|-----------|------------|
| <b>Efficacy</b>     |        |           |           |            |
| Pr(OR for C2 > 1)   | 0.6117 | >         | 0.99      | None       |
| <b>Futility</b>     |        |           |           |            |
| Pr(OR for C2 > 1.2) | 0.3476 | <         | 0.05      | None       |
| <b>Inferiority</b>  |        |           |           |            |
| Pr(C1 in optimal)   | 0.4167 | <         | 0.01      | None       |
| Pr(C2 in optimal)   | 0.5833 | <         | 0.01      | None       |
| <b>Superiority</b>  |        |           |           |            |
| Pr(C2 in optimal)   | 0.5833 | >         | 0.99      | None       |

C1 = No corticosteroids; C2 = Any steroid

## 4 Other Data Summaries

|    |           |        |        |         |             |             |          |                |                          |
|----|-----------|--------|--------|---------|-------------|-------------|----------|----------------|--------------------------|
| 1  | 7 (7)     | 9 (9)  | 7 (7)  | 15 (15) | 22 (21)     | 3 (3)       | 2 (2)    | 47 (46)        | 18 (18)                  |
| 2  | 5 (4)     | 9 (9)  | 3 (3)  | 8 (8)   |             | 1 (1)       |          | 18 (18)        |                          |
| 3  | 5 (5)     | 7 (7)  | 1 (1)  |         |             | 1 (1)       |          | 15 (15)        |                          |
| 4  | 5 (5)     | 6 (6)  |        |         |             | 1 (1)       |          | 12 (12)        |                          |
| 5  | 3 (3)     | 5 (4)  |        |         |             |             |          | 12 (12)        |                          |
| 6  | 3 (3)     | 5 (5)  |        |         |             |             |          | 11 (11)        |                          |
| 7  | 2 (2)     | 4 (4)  |        |         |             |             |          | 11 (11)        |                          |
| 8  | 1 (1)     | 4 (4)  |        |         |             |             |          | 9 (9)          |                          |
| 9  | 1 (1)     | 2 (2)  |        |         |             |             |          | 9 (9)          |                          |
| 10 | 1 (0)     |        |        |         |             |             |          | 9 (9)          |                          |
| 11 | 1 (1)     |        |        |         |             |             |          | 9 (9)          |                          |
| 12 | 1 (1)     |        |        |         |             |             |          | 9 (9)          |                          |
| 13 |           |        |        |         |             |             |          | 8 (7)          |                          |
| 14 |           |        |        |         |             |             |          | 8 (8)          |                          |
| 15 |           |        |        |         |             |             |          | 7 (7)          |                          |
| 16 |           |        |        |         |             |             |          | 7 (7)          |                          |
| 17 |           |        |        |         |             |             |          | 7 (7)          |                          |
| 18 |           |        |        |         |             |             |          | 7 (7)          |                          |
| 19 |           |        |        |         |             |             |          | 7 (7)          |                          |
| 20 |           |        |        |         |             |             |          | 7 (6)          |                          |
| 21 |           |        |        |         |             |             |          | 6 (6)          |                          |
| 22 |           |        |        |         |             |             |          | 6 (6)          |                          |
| 23 |           |        |        |         |             |             |          | 6 (4)          |                          |
| 24 |           |        |        |         |             |             |          | 6 (6)          |                          |
| 25 |           |        |        |         |             |             |          | 6 (6)          |                          |
| 26 |           |        |        |         |             |             |          | 5 (5)          |                          |
| 27 |           |        |        |         |             |             |          | 5 (5)          |                          |
| 28 |           |        |        |         |             |             |          | 5 (5)          |                          |
| 29 |           |        |        |         |             |             |          | 5 (5)          |                          |
| 30 |           |        |        |         |             |             |          | 5 (5)          |                          |
| 31 |           |        |        |         |             |             |          | 5 (5)          |                          |
| 32 |           |        |        |         |             |             |          | 5 (5)          |                          |
| 33 |           |        |        |         |             |             |          | 5 (5)          |                          |
| 34 |           |        |        |         |             |             |          | 4 (4)          |                          |
| 35 |           |        |        |         |             |             |          | 4 (4)          |                          |
| 36 |           |        |        |         |             |             |          | 4 (4)          |                          |
| 37 |           |        |        |         |             |             |          | 4 (4)          |                          |
| 38 |           |        |        |         |             |             |          | 4 (4)          |                          |
| 39 |           |        |        |         |             |             |          | 4 (4)          |                          |
| 40 |           |        |        |         |             |             |          | 4 (4)          |                          |
| 41 |           |        |        |         |             |             |          | 3 (3)          |                          |
| 42 |           |        |        |         |             |             |          | 3 (3)          |                          |
| 43 |           |        |        |         |             |             |          | 3 (3)          |                          |
| 44 |           |        |        |         |             |             |          | 3 (3)          |                          |
| 45 |           |        |        |         |             |             |          | 3 (2)          |                          |
| 46 |           |        |        |         |             |             |          | 3 (3)          |                          |
| 47 |           |        |        |         |             |             |          | 3 (3)          |                          |
| 48 |           |        |        |         |             |             |          | 3 (3)          |                          |
| 49 |           |        |        |         |             |             |          | 3 (3)          |                          |
| 50 |           |        |        |         |             |             |          | 3 (3)          |                          |
| 51 |           |        |        |         |             |             |          | 3 (3)          |                          |
| 52 |           |        |        |         |             |             |          | 3 (3)          |                          |
| 53 |           |        |        |         |             |             |          | 3 (3)          |                          |
| 54 |           |        |        |         |             |             |          | 3 (3)          |                          |
| 55 |           |        |        |         |             |             |          | 3 (3)          |                          |
| 56 |           |        |        |         |             |             |          | 2 (2)          |                          |
| 57 |           |        |        |         |             |             |          | 2 (2)          |                          |
| 58 |           |        |        |         |             |             |          | 2 (2)          |                          |
| 59 |           |        |        |         |             |             |          | 2 (2)          |                          |
| 60 |           |        |        |         |             |             |          | 2 (2)          |                          |
| 61 |           |        |        |         |             |             |          | 2 (2)          |                          |
| 62 |           |        |        |         |             |             |          | 2 (2)          |                          |
| 63 |           |        |        |         |             |             |          | 2 (2)          |                          |
| 64 |           |        |        |         |             |             |          | 2 (2)          |                          |
| 65 |           |        |        |         |             |             |          | 2 (2)          |                          |
| 66 |           |        |        |         |             |             |          | 2 (2)          |                          |
| 67 |           |        |        |         |             |             |          | 2 (2)          |                          |
| 68 |           |        |        |         |             |             |          | 2 (2)          |                          |
| 69 |           |        |        |         |             |             |          | 2 (2)          |                          |
| 70 |           |        |        |         |             |             |          | 1 (1)          |                          |
| 71 |           |        |        |         |             |             |          | 1 (1)          |                          |
| 72 |           |        |        |         |             |             |          | 1 (1)          |                          |
| 73 |           |        |        |         |             |             |          | 1 (1)          |                          |
| 74 |           |        |        |         |             |             |          | 1 (1)          |                          |
| 75 |           |        |        |         |             |             |          | 1 (1)          |                          |
| 76 |           |        |        |         |             |             |          | 1 (1)          |                          |
| 77 |           |        |        |         |             |             |          | 1 (1)          |                          |
| 78 |           |        |        |         |             |             |          | 1 (1)          |                          |
| 79 |           |        |        |         |             |             |          | 1 (1)          |                          |
| 80 |           |        |        |         |             |             |          | 1 (1)          |                          |
| 81 |           |        |        |         |             |             |          | 1 (1)          |                          |
| 82 |           |        |        |         |             |             |          | 1 (1)          |                          |
| 83 |           |        |        |         |             |             |          | 1 (1)          |                          |
| 84 |           |        |        |         |             |             |          | 1 (0)          |                          |
| 85 |           |        |        |         |             |             |          | 1 (1)          |                          |
| 86 |           |        |        |         |             |             |          | 1 (1)          |                          |
| 87 |           |        |        |         |             |             |          | 1 (1)          |                          |
| 88 |           |        |        |         |             |             |          | 1 (1)          |                          |
|    | Australia | Canada | France | Ireland | Netherlands | New Zealand | Portugal | United Kingdom | United States of America |

**Figure 4.1:** Sample size at each site within each country. The values in each cell represent the number of patients randomized to any domain at that site and, in parentheses, the number of patients for whom the outcome on the 21-day outcome is known. Within each country, all sites having fewer than 5 randomized patients are combined into a single site for the statistical model.

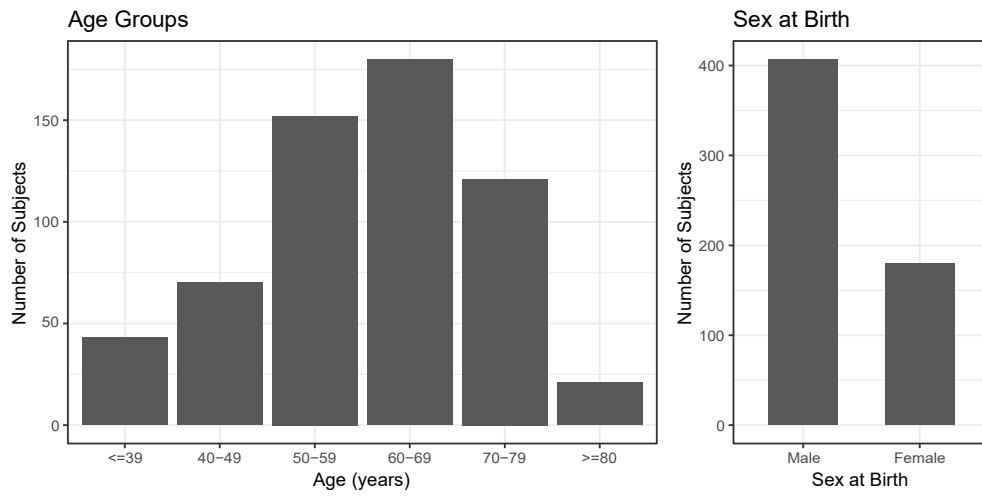

**Figure 4.2:** Distribution of age groups and sex at birth

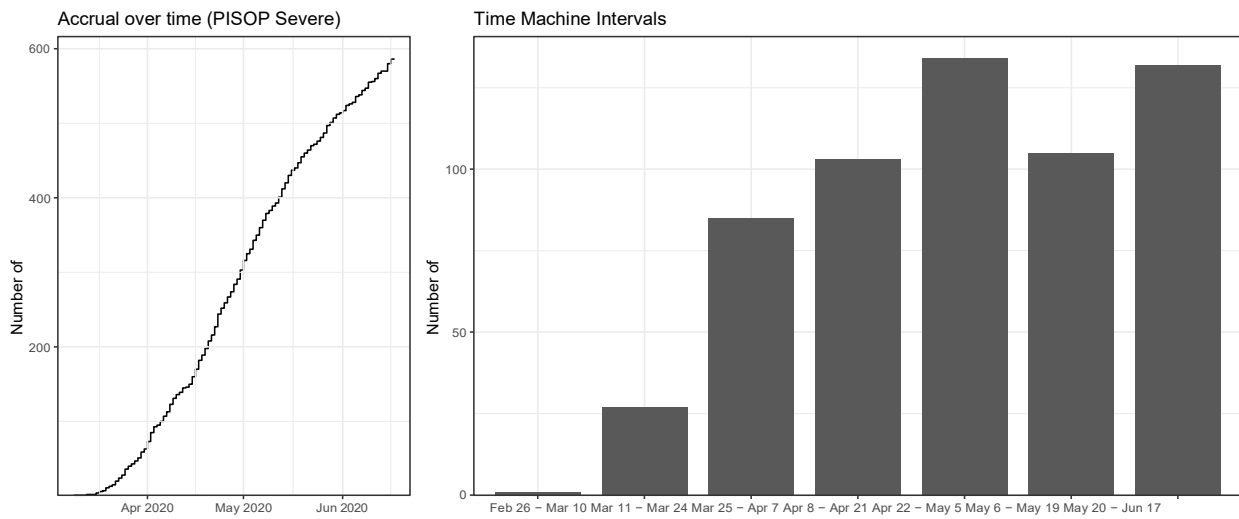

**Figure 4.3:** Accrual over time and distribution of patients within each of the time buckets used to estimate time trends in the analysis model. The time buckets are derived so that the first bucket is the most recent month going backwards in time from the most recently randomized patient in the dataset that has an outcome. Thereafter, each bucket is defined as the next two-week interval backwards in time.





**Table 4.1:** Summary of the number of sites and patients randomized within each country

| Region        | Country                  | All Domains     |                    | Steroid Domain  |                    |
|---------------|--------------------------|-----------------|--------------------|-----------------|--------------------|
|               |                          | Number of Sites | Number of Patients | Number of Sites | Number of Patients |
| ANZ           | Australia                | 12              | 35                 | 7               | 15                 |
|               | New Zealand              | 4               | 6                  | 2               | 2                  |
| Europe        | France                   | 3               | 11                 | 3               | 11                 |
|               | Ireland                  | 2               | 23                 | 2               | 12                 |
|               | Netherlands              | 1               | 22                 | 1               | 20                 |
|               | Portugal                 | 1               | 2                  |                 |                    |
|               | United Kingdom           | 88              | 419                | 70              | 275                |
| North America | Canada                   | 9               | 51                 | 8               | 34                 |
|               | United States of America | 1               | 18                 | 1               | 15                 |

**Table 4.2:** Summary of age groups by sex at birth

|        | Age Group (years) |       |       |       |       |      | Total |
|--------|-------------------|-------|-------|-------|-------|------|-------|
|        | ≤ 39              | 40–49 | 50–59 | 60–69 | 70–79 | ≥ 80 |       |
| Male   | 27                | 54    | 104   | 129   | 80    | 13   | 407   |
| Female | 16                | 16    | 48    | 51    | 41    | 8    | 180   |
| Total  | 43                | 70    | 152   | 180   | 121   | 21   | 587   |

## 5 Analysis Conventions

The following conventions were applied to the analyses contained in this report:

- All sites within a country that have < 5 patients randomized in the analysis population will have their results combined into a single site within that country.
- For the estimation of time trends in the model, time buckets with < 5 patients randomized within the bucket were combined with a neighboring bucket.
- Patients with no randomized assignment in any domain were removed from the analysis population.
- Data from some patients who withdrew consent for use of their data in the analysis were included in the data exports received by the SAC. Subsequently, the SAC received a separate file to identify such patients, and they were manually removed from the analysis population by the SAC.
- For some patients whose 21-day outcome was missing in the data export, a supplemental file was provided to the SAC in which some additional outcome data was obtained. These additional outcomes were merged into the analysis dataset by the SAC. For any patients in the supplemental file that had a non-missing outcome recorded in the database, the outcome from the supplemental file was used rather than the database version; however, the SAC verified that all non-missing outcomes were the same between the data export and the supplemental file.
- For unique patient identifiers that exist in both the Research Online and Spiral databases, we generally pull the eligibility and randomization information from the Spiral database and the outcomes from the Research Online database. If outcomes were reported in both places, the reported outcome in Spiral was selected per instructions from the global project manager for the trial (email dated August 6, 2020).
- Within a domain, the analysis convention, as documented in the Current State, is that patients who are *ineligible* for the domain, or who have *no assignment* within the domain, or whose assignment is *not revealed* within the domain will not contribute to the estimate of the treatment effect for that domain.

In some domains (but not in the corticosteroid domain) data inconsistencies have been identified where patients were recorded as *ineligible* or as *domain not active/not available*, but the patient had a randomized assignment that was revealed for that domain. In accordance with the pre-specified analysis convention, these patient outcomes do not inform the treatment effect estimates within their respective domains.

- If any intervention within a domain has no patients with known outcomes, the analysis convention is to set the respective model terms to zero, including any associated interactions terms if they exist.
- The SAC manually corrected the values for one patient for which the respective Moderate and Severe columns had been switched for the variable that identifies whether 21 days have elapsed since randomization. The data error was confirmed with the data center and documented by the SAC in a Note to File.

## 6 Model Stability

The Bayesian model was computed in R version 4.0.2, using the rstan package version 2.21.2. This package computes the Markov Chain Monte Carlo (MCMC) using the highly efficient Hamiltonian Monte Carlo method. The MCMC used 5 separate chains, with each chain using a burnin of 500 samples, followed by 2000 samples, for a total of 10000 samples. Convergence diagnostics were assessed, and no concerns regarding mixing or convergence were identified. All  $\hat{R}$  values were less than 1.05. All model runs used a random number seed of 7292020 for the MCMC initialization.

## 7 Report Production

All analyses in this report are based on the following documents:

- Statistical Analysis Plan (SAP) for the Corticosteroid Domain, version 1.0, dated July 21, 2020;
- Current State of the Statistical Model: Pandemic Model, dated July 21, 2020;
- Errata Sheet, last updated July 29, 2020;
- Instructions (“Single Source of Truth”), dated July 21, 2020.

Berry Consultants performed the analysis using data received from multiple sources. Table 7.1 shows the file names for the data exports from each database along with the names of supplemental files received by the SAC, and the dates on which each file was received by the SAC.

**Table 7.1:** Summary of data sources.

| File Name                                               | Date Received   | Description                            |
|---------------------------------------------------------|-----------------|----------------------------------------|
| 8.7.2020.UPMC.REMAPCOVID.EXPORT.v3.csv                  | August 7, 2020  | UPMC data                              |
| remapcap_spiral_interimexport_2020-08-11_175520.v10.csv | August 11, 2020 | Spiral data                            |
| RAR.Unscrambled.RO.20200810.new.csv                     | August 12, 2020 | Research Online data                   |
| Patients without consent 27 July 2020.xlsx              | July 27, 2020   | List of patients that withdrew consent |
| missing_outcome_ID_20200810.xlsx                        | August 11, 2020 | Supplemental 21-day outcome data       |

All data summaries were completed using the R<sup>1</sup> statistical computing environment R version 3.5.2 (2018-12-20).

<sup>1</sup>R Development Core Team (2005). R: *A language and environment for statistical computing*. R Foundation for Statistical Computing, Vienna, Austria. ISBN 3-900051-07-0. URL <http://www.R-project.org>.

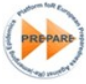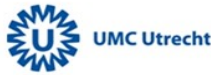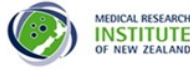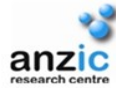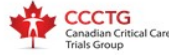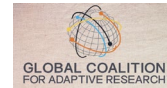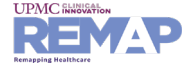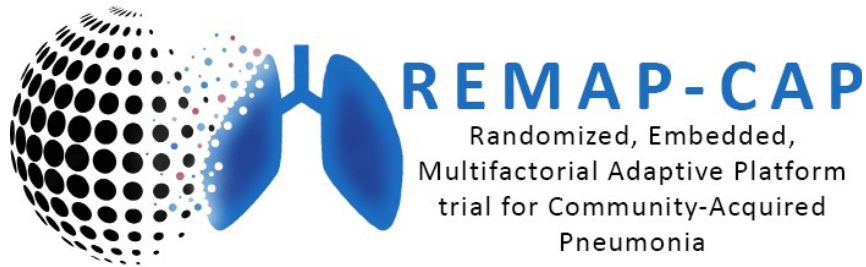

**eAppendix 4.** Technical Report from Berry Consultants for SAP Outcome Analyses 15.5-20

# Secondary/Sensitivity Analysis Results of the Corticosteroid Domain for Patients with COVID-19 Pandemic Infection Suspected Or Proven (PISOP)

COVID-19 Corticosteroid Domain Results Version 1.0 dated 13 August 2020

Prepared by the ITSC Analysis Committee

h

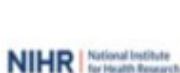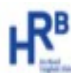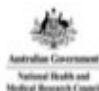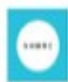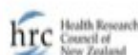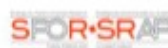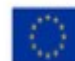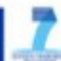

© 2020 American Medical Association. All rights reserved.

## TABLE OF CONTENTS

|     |                                                                                                                                                    |    |
|-----|----------------------------------------------------------------------------------------------------------------------------------------------------|----|
| 1.  | Authors                                                                                                                                            | 3  |
| 2.  | Introduction                                                                                                                                       | 4  |
| 3.  | Interventions                                                                                                                                      | 4  |
| 4.  | Disease States                                                                                                                                     | 4  |
| 5.  | Analysis Populations                                                                                                                               | 4  |
| 6.  | Endpoints                                                                                                                                          | 4  |
| 7.  | Specific prospective analyses                                                                                                                      | 6  |
| 8.  | Organ Support Free Days (OSFD)                                                                                                                     | 8  |
| a.  | Model 15.5: A secondary analysis of OSFD for Corticosteroid Domain ITT                                                                             | 11 |
| b.  | Model 15.6: A secondary analysis restricted to the Corticosteroid Domain Non-negative COVID<br>13                                                  |    |
| c.  | Model 15.7: A secondary analysis for the Corticosteroid Domain ITT combining corticosteroid<br>intervention arms                                   | 14 |
| d.  | Model 15.8: A sensitivity analysis restricted to the Corticosteroid Domain ITT with site and time<br>factors removed                               | 16 |
| 9.  | In-Hospital mortality                                                                                                                              | 17 |
| a.  | Model 15.9: A secondary analysis of in-hospital mortality restricted to the Corticosteroid<br>Domain ITT                                           | 18 |
| b.  | Model 15.10: A secondary analysis of in-hospital mortality for Corticosteroid Domain Non-<br>negative patients                                     | 19 |
| c.  | Model 15.11: A secondary analysis of in-hospital mortality restricted to the Corticosteroid<br>Domain ITT with the steroid interventions combined  | 21 |
| d.  | Model 15.12: A sensitivity analysis of in-hospital mortality restricted to the Corticosteroid<br>Domain ITT with factors for site and time removed | 22 |
| 10. | Mortality                                                                                                                                          | 23 |

|     |                                                                                                                                      |    |
|-----|--------------------------------------------------------------------------------------------------------------------------------------|----|
| a.  | Model 15.13: A secondary analysis of Mortality                                                                                       | 24 |
| 11. | Progression to intubation, ECMO, or death                                                                                            | 25 |
| a.  | Model 15.14: A secondary analysis of progression to intubation, ECMO, or death, restricted to patients not on MV or ECMO at baseline | 26 |
| 12. | Days-free of Vasopressor/inotropes use                                                                                               | 28 |
| a.  | Model 15.15: A secondary analysis of days-free of vasopressor/inotropes use                                                          | 28 |
| 13. | Days-free of ventilation                                                                                                             | 30 |
| a.  | Model 15.16: A secondary analysis of days-free of ventilation                                                                        | 30 |
| 14. | Length of ICU Stay                                                                                                                   | 32 |
| a.  | Model 15.17: A secondary analysis of length of ICU stay                                                                              | 33 |
| 15. | Length of Hospital Stay                                                                                                              | 35 |
| a.  | Model 15.18: A secondary analysis of length of hospital stay                                                                         | 35 |
| 16. | WHO Ordinal Scale                                                                                                                    | 37 |
| a.  | Model 15.19: A secondary analysis of the WHO Ordinal Scale                                                                           | 38 |
| 17. | Serious Adverse events                                                                                                               | 40 |
| a.  | Model 15.20: The primary safety analysis for the Corticosteroid Domain                                                               | 40 |

## **1. AUTHORS**

Lindsay Berry, Berry Consultants, Austin, TX, USA

Elizabeth Lorenzi, Berry Consultants, Austin, TX, USA

Scott Berry, Berry Consultants, Austin, TX, USA

## 2. INTRODUCTION

This document summarizes the data and the results for the corticosteroid domain for analyses 15.5-15.20 as outlined in the corticosteroid SAP. Results for models 15.1-15.4 are provided in the SAC document “Analysis of the Corticosteroid Domain.”

## 3. INTERVENTIONS

There are 4 interventions within the corticosteroid domain. These are

1. No corticosteroid/hydrocortisone (control)
2. Fixed duration hydrocortisone for 7 days (fixed duration)
3. Shock-Dependent hydrocortisone (shock-dependent)
4. High-Dose hydrocortisone for 7 days

For all analyses and data summaries the high-dose 7-day hydrocortisone arm will be combined with the fixed duration arm. These interventions were originally nested, which allows their pooling, and very few patients were randomized to Intervention #4.

## 4. DISEASE STATES

There are 2 disease states in the PATc, which are **moderate** and **severe**. The corticosteroid domain was only randomized to patients in the severe state, so only patients in the severe state will be analyzed.

## 5. ANALYSIS POPULATIONS

1. REMAP-COVID severe state intent-to-treat (ITT). This population consists of all PISOP patients in the severe state randomized within at least one domain.
2. Corticosteroid Domain ITT. All patients randomized to an intervention in the corticosteroid domain within the PISOP stratum.
3. Corticosteroid domain Non-negative COVID. All patients randomized in the corticosteroid domain after removing those with  $\geq 1$  negative test for COVID **and** no positive tests.

## 6. ENDPOINTS

The following end points will be analyzed, graphically displayed, and summarized through descriptive statistics.

1. **Organ-Support Free-Days (OSFD)**
  - a. An ordinal endpoint with mortality as the worst outcome. The primary endpoint for the REMAP-CAP PISOP stratum. The organs considered are cardiovascular (vasopressor/inotrope support) and respiratory (ventilation support). See the PATC SAP for a detailed description.
2. **In-Hospital Mortality**
  - a. A dichotomous endpoint of in-hospital death where the death component corresponds to a –1 on the OSFD endpoint.
3. **Mortality**
  - a. This is a time-to-event endpoint through 90-days.
  - b. Any patient currently in the hospital or transferred on organ support to an alternative care facility will be censored at their last known status alive.
  - c. Any patient successfully discharged from hospital, alive, without organ support, will be imputed as a 90-day “no mortality” event if 90-day mortality data is not yet recorded.
4. **Progression to intubation and mechanical ventilation, extracorporeal membrane oxygenation (ECMO), or death**
  - a. A dichotomous endpoint of whether a patient progresses to intubation and mechanical ventilation, ECMO or death in hospital.
5. **Vasopressor/Inotrope Free-Days**
  - a. An ordinal outcome of number of days free of Vasopressor/Inotropes. This is the exact calculation of OSFD, with Vasopressor/Inotropes as the only organ support category. In-hospital death is considered a –1.
6. **Ventilator Free-Days**
  - a. An ordinal outcome of number of days free of ventilation. This is the exact calculation of OSFD, with ventilation as the only organ support category. In-hospital death is considered a –1.
7. **Duration of ICU stay**
  - a. A time-to-event endpoint of leaving the ICU alive. If a patient is known to leave the ICU and return to the ICU within 14-days that intervening time will be ignored.
  - b. This variable will be truncated at 90-days: all deaths in ICU will be considered 90-days with no liberation of ICU.
  - c. Patients still in the ICU at data snapshot will be considered censored.

## 8. Duration of hospital stay

- a. A time-to-event endpoint of leaving the hospital alive. If a patient is known to leave and return to the hospital within 14-days that intervening time will be ignored.
- b. This variable will be truncated at 90-days and all deaths in-hospital will be considered 90-days with no events.
- c. Patients still in the hospital at data snapshot will be considered censored.

## 9. At least one serious adverse event (SAE)

- a. A dichotomous endpoint of SAE.

## 10. The World Health Organization (WHO) 8-point ordinal scale, measured at day 14.

- a. The WHO 8-point ordinal scale:
  - 1 = No limitations
  - 2 = Limitation of activities
  - 3 = Hospitalized, no oxygen therapy
  - 4 = Oxygen by mask or nasal prongs
  - 5 = Non-invasive ventilation or high-flow oxygen
  - 6 = Intubation and mechanical ventilation
  - 7 = Ventilation + additional organ support: vasopressors, renal replacement therapy (RRT), ECMO
  - 8 = Death

## 7. SPECIFIC PROSPECTIVE ANALYSES

The table below displays the 15 pre-specified prospective analyses completed by the ITSC Analysis Committee.

| #    | Status      | Population                               | Endpoint              | Other                        |
|------|-------------|------------------------------------------|-----------------------|------------------------------|
| 15.5 | Secondary   | Corticosteroid Domain ITT                | OSFD                  |                              |
| 15.6 | Secondary   | Corticosteroid Domain Non-negative COVID | OSFD                  |                              |
| 15.7 | Secondary   | Corticosteroid Domain ITT                | OSFD                  | Combined corticosteroid arms |
| 15.8 | Sensitivity | Corticosteroid Domain ITT                | OSFD                  | Remove site and time effects |
| 15.9 | Secondary   | Corticosteroid Domain ITT                | In-Hospital Mortality |                              |



|              |                               |                                                             |                                              |                                                   |
|--------------|-------------------------------|-------------------------------------------------------------|----------------------------------------------|---------------------------------------------------|
| <b>15.10</b> | Secondary                     | Corticosteroid Domain<br>Non-negative COVID                 | In-Hospital Mortality                        |                                                   |
| <b>15.11</b> | Secondary                     | Corticosteroid Domain ITT                                   | In-Hospital Mortality                        | Combined corticosteroid arms                      |
| <b>15.12</b> | Sensitivity                   | Corticosteroid Domain ITT                                   | In-Hospital Mortality                        | Remove site and time effects                      |
| <b>15.13</b> | Secondary                     | Corticosteroid Domain ITT                                   | Mortality                                    | Time-to-events modeling                           |
| <b>15.14</b> | Secondary                     | Corticosteroid Domain ITT<br>not on MV, ECMO at<br>baseline | Progression to<br>intubation, ECMO,<br>death |                                                   |
| <b>15.15</b> | Secondary                     | Corticosteroid Domain ITT                                   | Days-Free of<br>vasopressor/inotropes        |                                                   |
| <b>15.16</b> | Secondary                     | Corticosteroid Domain ITT                                   | Days-Free of<br>ventilation                  |                                                   |
| <b>15.17</b> | Secondary                     | Corticosteroid Domain ITT                                   | Length of ICU Stay                           | Time-to-events modeling                           |
| <b>15.18</b> | Secondary                     | Corticosteroid Domain ITT                                   | Length of Hospital<br>Stay                   | Time-to-events modeling                           |
| <b>15.19</b> | Secondary                     | Corticosteroid Domain ITT                                   | WHO Scale at 14<br>days                      |                                                   |
| <b>15.20</b> | Primary<br>Safety<br>Analysis | Corticosteroid Domain ITT                                   | Serious adverse<br>events per patient        | The time components are<br>removed from the model |

## 8. ORGAN SUPPORT FREE DAYS (OSFD)

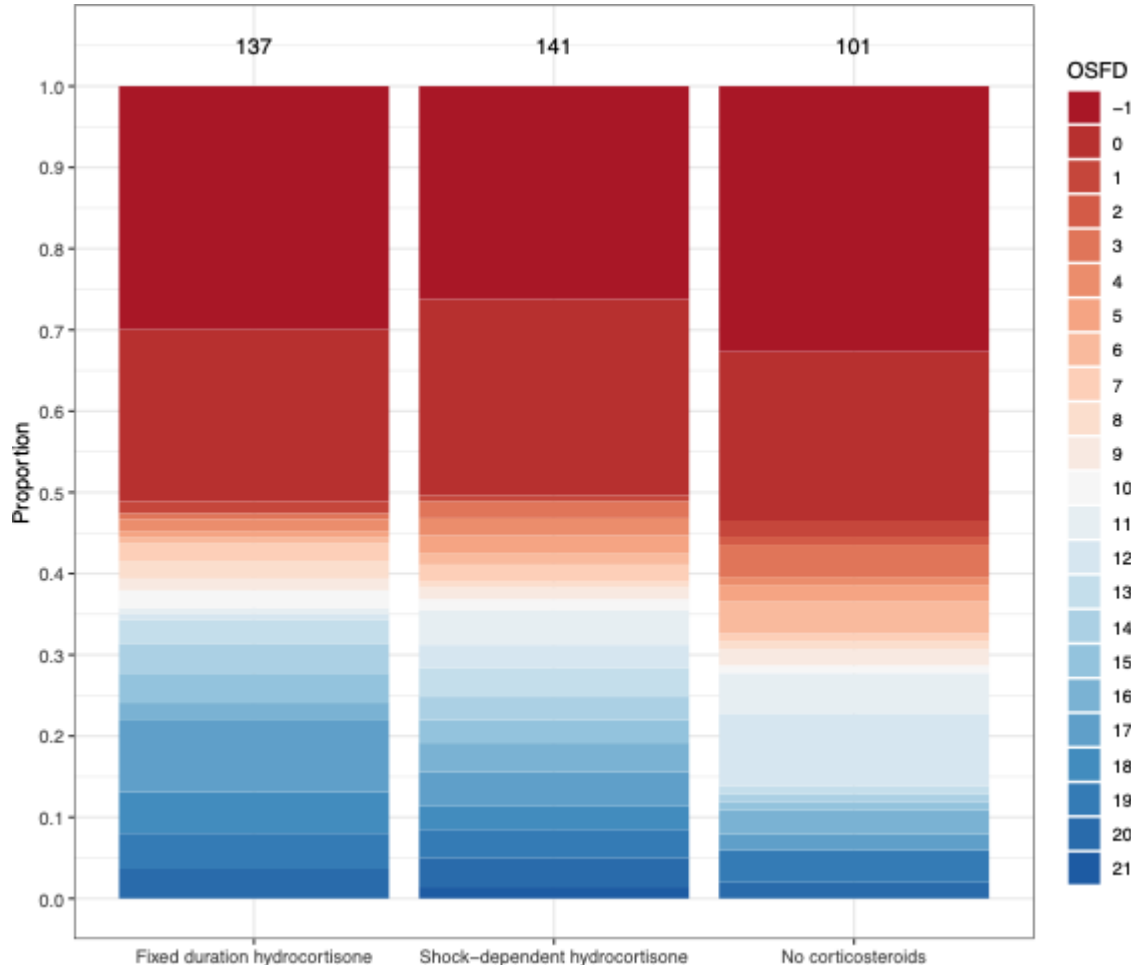

Figure 1: Empirical distribution of OSFD for each intervention in the Corticosteroid domain.

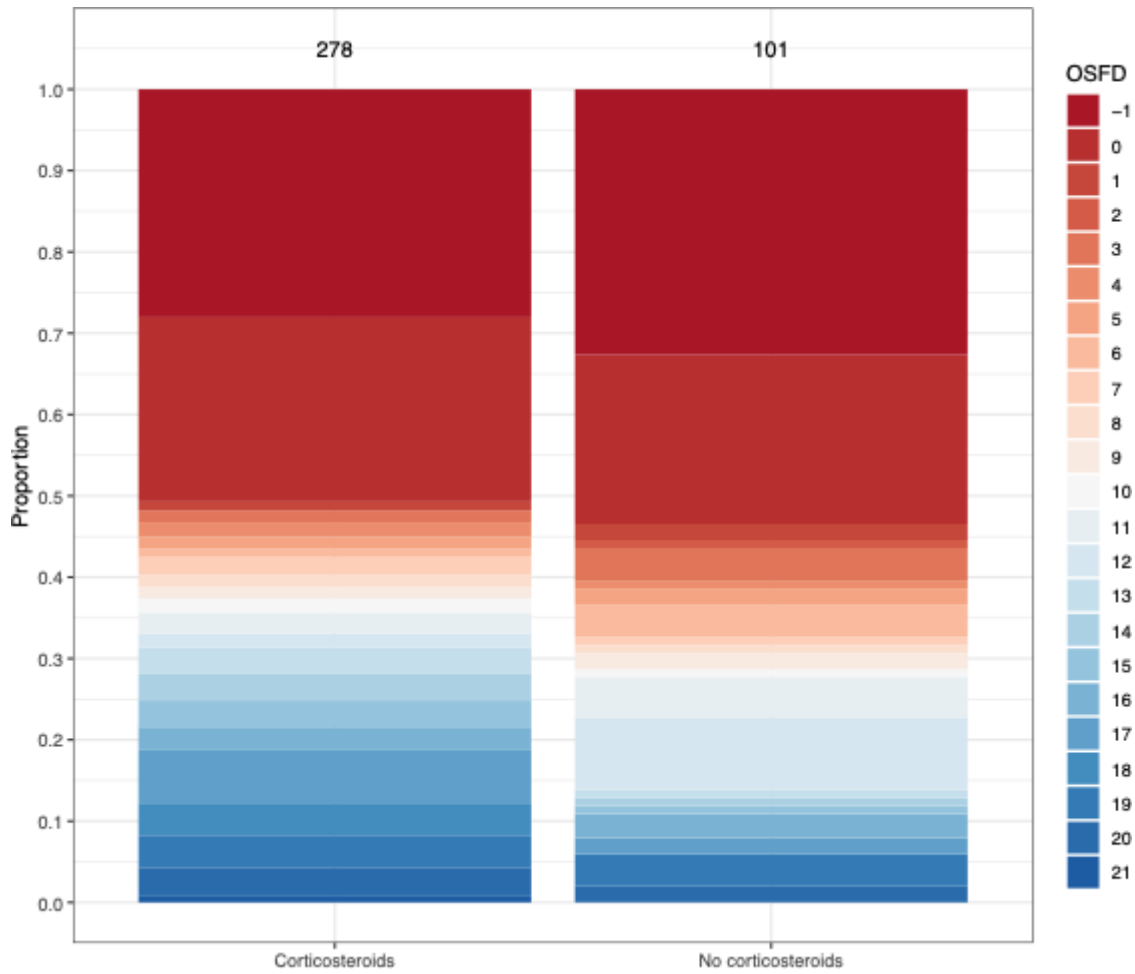

Figure 2: Empirical distribution of OSFD in the Corticosteroid domain for the pooled corticosteroid interventions and the “no corticosteroids” intervention.

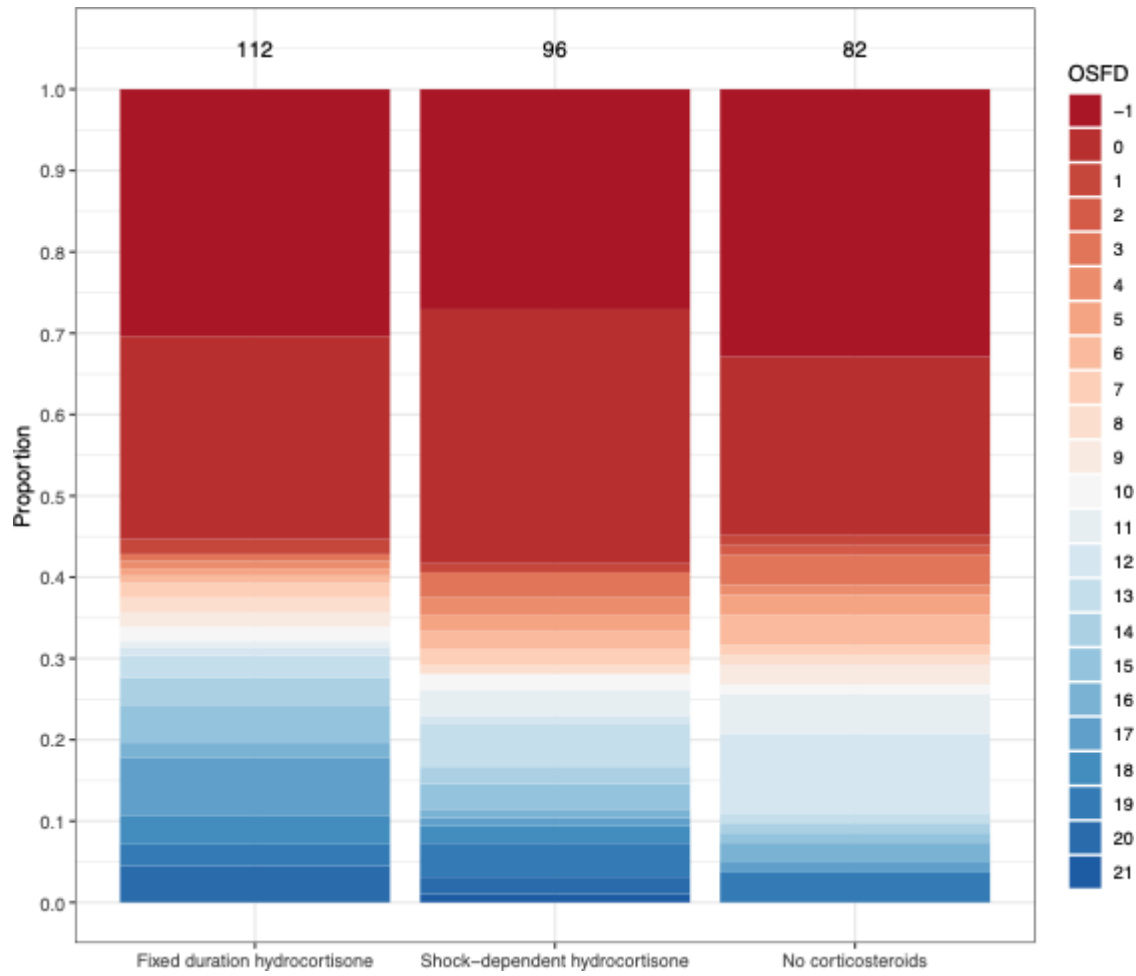

Figure 3: Empirical distribution of OSFD for all interventions in the Corticosteroid domain. Plot restricted to only patients in the Corticosteroid Domain Non-Negative COVID population.

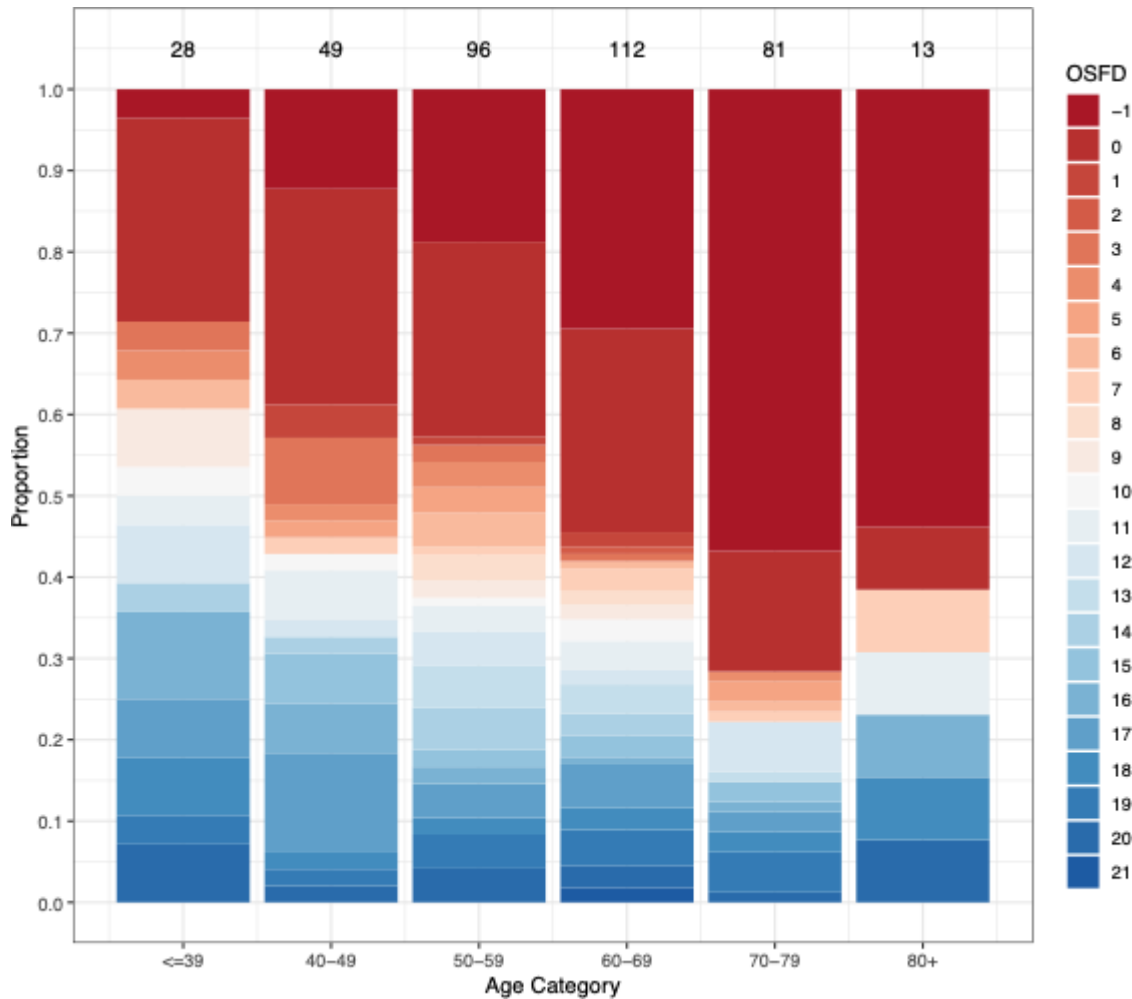

Figure 4: Empirical distribution of OSFD by age category

**a. Model 15.5: A secondary analysis of OSFD for Corticosteroid Domain ITT**

- Population: Corticosteroid Domain ITT
- Endpoint: Organ-Support Free-Days
- Model: Primary analysis ordinal model
- Factors: Age, sex, site, time, corticosteroid interventions: control, fixed-duration, shock-based
- Analysis: Conducted by the ITSC Analysis Center

**Notes**

1. The primary summary for the domain will be the probability that each intervention is in the optimal regimen. A 99% probability of being in the optimal regimen would hit the domain superiority statistical trigger.
2. Each intervention will be compared to the control arm. A posterior probability of superiority of 99% will be used as a statistical trigger for efficacy.
3. The two corticosteroid interventions will be compared for equivalence. A 90% probability of a smaller than 1.2 odds-ratio difference between the fixed-duration intervention and the shock-based intervention would hit the statistical trigger for equivalence.

Posterior probabilities for the OSFD endpoint in the Corticosteroid Domain ITT population:

| Quantity of Interest                        | Posterior Probability |
|---------------------------------------------|-----------------------|
| Control arm is in the optimal regimen       | 0.03                  |
| Fixed-duration is in the optimal regimen    | 0.74                  |
| Shock-based is in the optimal regimen       | 0.23                  |
| Fixed-duration is superior to control       | 0.95                  |
| Shock-based is superior to control          | 0.83                  |
| Fixed-duration is equivalent to shock-based | 0.49                  |

Model 15.5 estimated odds-ratios:

| Odds-Ratio Parameter                                       | Mean | SD   | Median | 95% Credible Interval |
|------------------------------------------------------------|------|------|--------|-----------------------|
| Age < 39                                                   | 4.19 | 1.59 | 3.93   | (1.92, 8.09)          |
| Age 40, 49                                                 | 2.47 | 0.72 | 2.36   | (1.35, 4.18)          |
| Age 50, 59                                                 | 1.96 | 0.48 | 1.90   | (1.19, 3.06)          |
| Age 70-79                                                  | 0.42 | 0.12 | 0.40   | (0.23, 0.68)          |
| Age 80+                                                    | 0.61 | 0.35 | 0.53   | (0.19, 1.50)          |
| Female                                                     | 1.16 | 0.25 | 1.14   | (0.75, 1.72)          |
| Time Bucket 1                                              | 0.89 | 0.10 | 0.89   | (0.70, 1.10)          |
| Time Bucket 2                                              | 0.81 | 0.17 | 0.8    | (0.48, 1.17)          |
| Time Bucket 3                                              | 1.00 | 0.25 | 0.97   | (0.61, 1.59)          |
| Time Bucket 4                                              | 1.16 | 0.43 | 1.09   | (0.55, 2.23)          |
| Time Bucket 5                                              | 1.62 | 1.15 | 1.31   | (0.46, 4.69)          |
| Fixed-duration Corticosteroids                             | 1.49 | 0.35 | 1.45   | (0.93, 2.30)          |
| Shock-based Corticosteroids                                | 1.28 | 0.30 | 1.24   | (0.80, 1.95)          |
| Fixed-duration Corticosteroids/Shock-based Corticosteroids | 1.20 | 0.27 | 1.16   | (0.75, 1.80)          |

**b. Model 15.6: A secondary analysis restricted to the Corticosteroid Domain Non-negative COVID**

- Population: Corticosteroid Domain Non-negative COVID
- Endpoint: Organ-Support Free-Days
- Model: Primary analysis ordinal model
- Factors: Age, sex, site, time, corticosteroid interventions: control, fixed-duration, shock-based
- Analysis: Conducted by the ITSC Analysis Center

**Notes**

1. The primary summary for the domain will be the probability that each intervention is in the optimal regimen. A 99% probability of being in the optimal regimen would hit the domain superiority statistical trigger.
2. Each intervention will be compared to the control arm. A posterior probability of superiority of 99% will be used as a statistical trigger for efficacy.
3. The two corticosteroid interventions will be compared for equivalence. A 90% probability of a smaller than 1.2 odds-ratio difference between the fixed-duration intervention and the shock-based intervention would hit the statistical trigger for equivalence.

Posterior probabilities for the OSFD endpoint in the Corticosteroid Domain Non-negative COVID population:

| Quantity of Interest                        | Posterior Probability |
|---------------------------------------------|-----------------------|
| Control arm is in the optimal regimen       | 0.12                  |
| Fixed-duration is in the optimal regimen    | 0.74                  |
| Shock-based is in the optimal regimen       | 0.14                  |
| Fixed-duration is superior to control       | 0.85                  |
| Shock-based is superior to control          | 0.53                  |
| Fixed-duration is equivalent to shock-based | 0.35                  |

Model 15.6 estimated odds-ratios:

| Odds-Ratio Parameter | Mean | SD   | Median | 95% Credible Interval |
|----------------------|------|------|--------|-----------------------|
| Age < 39             | 4.44 | 1.94 | 4.06   | (1.79, 9.24)          |
| Age 40, 49           | 1.92 | 0.64 | 1.83   | (0.96, 3.40)          |
| Age 50, 59           | 2.17 | 0.60 | 2.09   | (1.24, 3.54)          |
| Age 70-79            | 0.42 | 0.14 | 0.40   | (0.22, 0.75)          |
| Age 80+              | 0.87 | 0.65 | 0.70   | (0.18, 2.56)          |
| Female               | 0.99 | 0.24 | 0.96   | (0.60, 1.54)          |

|                                                                         |      |      |      |              |
|-------------------------------------------------------------------------|------|------|------|--------------|
| Time Bucket 1                                                           | 0.94 | 0.11 | 0.94 | (0.72, 1.16) |
| Time Bucket 2                                                           | 0.97 | 0.20 | 0.96 | (0.60, 1.41) |
| Time Bucket 3                                                           | 1.24 | 0.37 | 1.18 | (0.69, 2.11) |
| Time Bucket 4                                                           | 1.51 | 0.70 | 1.37 | (0.60, 3.24) |
| Time Bucket 5                                                           | 2.01 | 1.92 | 1.53 | (0.44, 6.46) |
| Fixed-duration<br>Corticosteroids                                       | 1.36 | 0.36 | 1.32 | (0.79, 2.16) |
| Shock-based<br>Corticosteroids                                          | 1.06 | 0.29 | 1.02 | (0.60, 1.73) |
| Shock-based<br>Corticosteroids vs.<br>Fixed-duration<br>Corticosteroids | 1.33 | 0.35 | 1.28 | (0.78, 2.15) |

**c. Model 15.7: A secondary analysis for the Corticosteroid Domain ITT combining corticosteroid intervention arms**

- Population: Corticosteroid Domain ITT
- Endpoint: Organ-Support Free-Days
- Model: Primary analysis ordinal model
- Factors: Age, sex, site, time, corticosteroid interventions: control, corticosteroids: combined fixed-duration and shock-based
- Analysis: Conducted by the ITSC Analysis Center

**Notes**

1. The primary summary for the domain will be the probability that each intervention is in the optimal regimen. A 99% probability of being in the optimal regimen would hit the domain superiority statistical trigger.
2. Corticosteroids will be compared to the control arm. A posterior probability of superiority of 99% will be used as a statistical trigger for efficacy.

Posterior probabilities for the OSFD endpoint in the Corticosteroid Domain combining corticosteroid intervention arms:

| Quantity of Interest                          | Posterior Probability |
|-----------------------------------------------|-----------------------|
| Control arm is in the optimal regimen         | 0.07                  |
| Corticosteroids use is in the optimal regimen | 0.93                  |

Model 15.7 estimated odds-ratios:



| Odds-Ratio Parameter | Mean | SD   | Median | 95% Credible Interval |
|----------------------|------|------|--------|-----------------------|
| Age < 39             | 4.17 | 1.53 | 3.91   | (1.93, 7.86)          |
| Age 40, 49           | 2.49 | 0.75 | 2.38   | (1.34, 4.26)          |
| Age 50, 59           | 1.97 | 0.48 | 1.91   | (1.20, 3.06)          |
| Age 70-79            | 0.42 | 0.12 | 0.41   | (0.24, 0.70)          |
| Age 80+              | 0.60 | 0.34 | 0.53   | (0.18, 1.45)          |
| Female               | 1.16 | 0.24 | 1.14   | (0.77, 1.71)          |
| Time Bucket 1        | 0.89 | 0.10 | 0.89   | (0.70, 1.10)          |
| Time Bucket 2        | 0.81 | 0.18 | 0.80   | (0.47, 1.18)          |
| Time Bucket 3        | 1.00 | 0.26 | 0.97   | (0.60, 1.59)          |
| Time Bucket 4        | 1.16 | 0.42 | 1.10   | (0.55, 2.18)          |
| Time Bucket 5        | 1.58 | 1.09 | 1.32   | (0.46, 4.32)          |
| Corticosteroids      | 1.40 | 0.30 | 1.36   | (0.91, 2.07)          |

**d. Model 15.8: A sensitivity analysis restricted to the Corticosteroid Domain ITT with site and time factors removed**

- Population: Corticosteroid Domain ITT
- Endpoint: Organ-Support Free-Days
- Model: Primary analysis ordinal model
- Factors: Age, sex, corticosteroid interventions: control, fixed-duration, shock-based
- Analysis: Conducted by the ITSC Analysis Center

**Notes**

1. The primary summary for the domain will be the probability that each intervention is in the optimal regimen. A 99% probability of being in the optimal regimen would hit the domain superiority statistical trigger.
2. Each intervention will be compared to the control arm. A posterior probability of superiority of 99% will be used as a statistical trigger for efficacy.
3. The two corticosteroid interventions will be compared for equivalence. A 90% probability of a smaller than 1.2 odds-ratio difference between the fixed-duration intervention and the shock-based intervention would hit the statistical trigger for equivalence.

Posterior probabilities for the OSFD endpoint in the Corticosteroid Domain ITT population with site and time factors removed:

| Quantity of Interest                        | Posterior Probability |
|---------------------------------------------|-----------------------|
| Control arm is in the optimal regimen       | 0.02                  |
| Fixed-duration is in the optimal regimen    | 0.59                  |
| Shock-based is in the optimal regimen       | 0.39                  |
| Fixed-duration is superior to control       | 0.95                  |
| Shock-based is superior to control          | 0.93                  |
| Fixed-duration is equivalent to shock-based | 0.59                  |

Model 15.8 estimated odds-ratios:

| Odds-Ratio Parameter | Mean | SD   | Median | 95% Credible Interval |
|----------------------|------|------|--------|-----------------------|
| Age < 39             | 3.37 | 1.19 | 3.18   | (1.65, 6.28)          |
| Age 40, 49           | 1.98 | 0.56 | 1.90   | (1.12, 3.28)          |
| Age 50, 59           | 1.61 | 0.38 | 1.56   | (0.99, 2.45)          |
| Age 70-79            | 0.45 | 0.12 | 0.44   | (0.26, 0.73)          |
| Age 80+              | 0.70 | 0.39 | 0.61   | (0.22, 1.67)          |
| Female               | 1.15 | 0.23 | 1.13   | (0.77, 1.68)          |

|                                                                |      |      |      |              |
|----------------------------------------------------------------|------|------|------|--------------|
| Fixed-duration Corticosteroids                                 | 1.50 | 0.34 | 1.46 | (0.94, 2.26) |
| Shock-based Corticosteroids                                    | 1.42 | 0.31 | 1.38 | (0.90, 2.12) |
| Shock-based Corticosteroids vs. Fixed-duration Corticosteroids | 1.08 | 0.23 | 1.06 | (0.70, 1.61) |

## 9. IN-HOSPITAL MORTALITY

Table 1: Summary of in-hospital mortality for patients in the Corticosteroid ITT and Corticosteroid Non-negative COVID populations for each intervention in the Corticosteroid domain

| Population                       | Intervention                   | Number with Known Outcome | Number of Deaths | Mortality rate |
|----------------------------------|--------------------------------|---------------------------|------------------|----------------|
| Corticosteroids ITT              | No corticosteroids             | 101                       | 33               | 0.33           |
|                                  | Fixed Duration Corticosteroids | 137                       | 41               | 0.30           |
|                                  | Shock-based Corticosteroids    | 141                       | 37               | 0.26           |
|                                  | Corticosteroid (Pooled)        | 278                       | 78               | 0.28           |
|                                  | Overall                        | 379                       | 111              | 0.29           |
| Corticosteroids Non-negative ITT | No corticosteroids             | 82                        | 27               | 0.33           |
|                                  | Fixed Duration Corticosteroids | 112                       | 34               | 0.30           |
|                                  | Shock-based Corticosteroids    | 96                        | 26               | 0.26           |
|                                  | Corticosteroid (Pooled)        | 208                       | 60               | 0.29           |
|                                  | Overall                        | 290                       | 87               | 0.30           |

**a. Model 15.9: A secondary analysis of in-hospital mortality restricted to the Corticosteroid Domain ITT**

- Population: Corticosteroid Domain ITT
- Endpoint: In-Hospital Mortality
- Model: Primary dichotomous model
- Factors: Age, sex, site, time, corticosteroid interventions: control, fixed-duration, shock-based
- Analysis: Conducted by the ITSC Analysis Center

**Notes**

1. The primary summary for the domain will be the probability that each intervention is in the optimal regimen. A 99% probability of being in the optimal regimen would hit the domain superiority statistical trigger.
2. Each intervention will be compared to the control arm. A posterior probability of superiority of 99% will be used as a statistical trigger for efficacy.
3. The two corticosteroid interventions will be compared for equivalence. A 90% probability of a smaller than 1.2 odds-ratio difference between the fixed-duration intervention and the shock-based intervention would hit the statistical trigger for equivalence.

Posterior probabilities for the in-hospital mortality endpoint in the Corticosteroid Domain ITT population:

| Quantity of Interest                        | Posterior Probability |
|---------------------------------------------|-----------------------|
| Control arm is in the optimal regimen       | 0.17                  |
| Fixed-duration is in the optimal regimen    | 0.33                  |
| Shock-based is in the optimal regimen       | 0.49                  |
| Fixed-duration is superior to control       | 0.64                  |
| Shock-based is superior to control          | 0.71                  |
| Fixed-duration is equivalent to shock-based | 0.43                  |

Model 15.9 estimated odds-ratios:

| Odds-Ratio Parameter | Mean  | SD    | Median | 95% Credible Interval |
|----------------------|-------|-------|--------|-----------------------|
| Age < 39             | 13.95 | 10.86 | 10.99  | (3.41, 41.40)         |
| Age 40, 49           | 5.32  | 2.72  | 4.68   | (2.06, 12.31)         |
| Age 50, 59           | 2.94  | 1.03  | 2.76   | (1.47, 5.42)          |
| Age 70-79            | 0.29  | 0.10  | 0.28   | (0.15, 0.52)          |

|                                                                         |      |      |      |               |
|-------------------------------------------------------------------------|------|------|------|---------------|
| Age 80+                                                                 | 0.34 | 0.21 | 0.29 | (0.09, 0.88)  |
| Female                                                                  | 1.08 | 0.32 | 1.04 | (0.59, 1.83)  |
| Time Bucket 1                                                           | 0.99 | 0.12 | 0.98 | (0.76, 1.23)  |
| Time Bucket 2                                                           | 0.99 | 0.23 | 0.97 | (0.56, 1.48)  |
| Time Bucket 3                                                           | 1.24 | 0.41 | 1.17 | (0.64, 2.23)  |
| Time Bucket 4                                                           | 1.59 | 0.85 | 1.39 | (0.59, 3.73)  |
| Time Bucket 5                                                           | 2.93 | 6.71 | 1.75 | (0.49, 12.15) |
| Fixed-duration<br>Corticosteroids                                       | 1.17 | 0.37 | 1.11 | (0.60, 2.05)  |
| Shock-based<br>Corticosteroids                                          | 1.26 | 0.41 | 1.19 | (0.65, 2.21)  |
| Shock-based<br>Corticosteroids vs.<br>Fixed-duration<br>Corticosteroids | 0.98 | 0.31 | 0.93 | (0.51, 1.70)  |

**b. Model 15.10: A secondary analysis of in-hospital mortality for Corticosteroid Domain Non-negative patients**

- Population: Corticosteroid Domain Non-Negative
- Endpoint: In-Hospital Mortality
- Model: Primary dichotomous model
- Factors: Age, sex, site, time, corticosteroid interventions: control, fixed-duration, shock-based
- Analysis: Conducted by the ITSC Analysis Center

**Notes**

1. The primary summary for the domain will be the probability that each intervention is in the optimal regimen. A 99% probability of being in the optimal regimen would hit the domain superiority statistical trigger.
2. Each intervention will be compared to the control arm. A posterior probability of superiority of 99% will be used as a statistical trigger for efficacy.
3. The two corticosteroid interventions will be compared for equivalence. A 90% probability of a smaller than 1.2 odds-ratio difference between the fixed-duration intervention and the shock-based intervention would hit the statistical trigger for equivalence.

Posterior probabilities for the in-hospital mortality endpoint in the Corticosteroid Domain Non-negative COVID population:

| Quantity of Interest | Posterior Probability |
|----------------------|-----------------------|
|----------------------|-----------------------|

|                                             |      |
|---------------------------------------------|------|
| Control arm is in the optimal regimen       | 0.26 |
| Fixed-duration is in the optimal regimen    | 0.25 |
| Shock-based is in the optimal regimen       | 0.49 |
| Fixed-duration is superior to control       | 0.49 |
| Shock-based is superior to control          | 0.64 |
| Fixed-duration is equivalent to shock-based | 0.37 |

Model 15.10 estimated odds-ratios:

| Odds-Ratio Parameter                                           | Mean  | SD    | Median | 95% Credible Interval |
|----------------------------------------------------------------|-------|-------|--------|-----------------------|
| Age < 39                                                       | 10.96 | 9.76  | 8.31   | (2.39, 35.12)         |
| Age 40, 49                                                     | 3.95  | 2.11  | 3.46   | (1.40, 9.41)          |
| Age 50, 59                                                     | 3.05  | 1.17  | 2.84   | (1.43, 5.91)          |
| Age 70-79                                                      | 0.27  | 0.11  | 0.25   | (0.12, 0.53)          |
| Age 80+                                                        | 0.60  | 0.50  | 0.46   | (0.11, 1.88)          |
| Female                                                         | 0.97  | 0.33  | 0.92   | (0.49, 1.73)          |
| Time Bucket 1                                                  | 1.02  | 0.12  | 1.01   | (0.79, 1.28)          |
| Time Bucket 2                                                  | 1.10  | 0.26  | 1.08   | (0.66, 1.67)          |
| Time Bucket 3                                                  | 1.39  | 0.54  | 1.29   | (0.65, 2.70)          |
| Time Bucket 4                                                  | 1.93  | 1.65  | 1.53   | (0.54, 5.83)          |
| Time Bucket 5                                                  | 4.41  | 22.54 | 1.76   | (0.36, 18.33)         |
| Fixed-Duration Corticosteroids                                 | 1.05  | 0.36  | 0.99   | (0.50, 1.90)          |
| Shock-based Corticosteroids                                    | 1.21  | 0.44  | 1.13   | (0.56, 2.29)          |
| Shock-based Corticosteroids vs. Fixed-Duration Corticosteroids | 0.93  | 0.34  | 0.88   | (0.44, 1.75)          |

**c. Model 15.11: A secondary analysis of in-hospital mortality restricted to the Corticosteroid Domain ITT with the steroid interventions combined**

- Population: Corticosteroid Domain ITT
- Endpoint: In-Hospital Mortality
- Model: Primary dichotomous model
- Factors: Age, sex, corticosteroid interventions: control, corticosteroids: combined fixed-duration and shock-based
- Analysis: Conducted by the ITSC Analysis Center

**Notes**

1. The primary summary for the domain will be the probability that each intervention is in the optimal regimen. A 99% probability of being in the optimal regimen would hit the domain superiority statistical trigger.
2. Corticosteroids will be compared to the control arm. A posterior probability of superiority of 99% will be used as a statistical trigger for efficacy.

Posterior probabilities for the in-hospital mortality endpoint in the Corticosteroid Domain ITT population with the steroid interventions combined:

| Quantity of Interest                         | Posterior Probability |
|----------------------------------------------|-----------------------|
| Control arm is in the optimal regimen        | 0.29                  |
| Corticosteroid use is in the optimal regimen | 0.71                  |

Model 15.11 estimated odds ratios:

| Odds-Ratio Parameter | Mean  | SD    | Median | 95% Credible Interval |
|----------------------|-------|-------|--------|-----------------------|
| Age < 39             | 14.25 | 11.46 | 11.05  | (3.35, 44.91)         |
| Age 40, 49           | 5.28  | 2.70  | 4.66   | (2.01, 12.05)         |
| Age 50, 59           | 2.92  | 1.03  | 2.73   | (1.46, 5.35)          |
| Age 70-79            | 0.29  | 0.10  | 0.28   | (0.15, 0.52)          |
| Age 80+              | 0.34  | 0.20  | 0.29   | (0.09, 0.84)          |
| Female               | 1.09  | 0.32  | 1.04   | (0.59, 1.84)          |
| Time Bucket 1        | 0.98  | 0.12  | 0.98   | (0.76, 1.23)          |
| Time Bucket 2        | 0.98  | 0.23  | 0.96   | (0.55, 1.49)          |
| Time Bucket 3        | 1.22  | 0.41  | 1.15   | (0.64, 2.24)          |

|                 |      |       |      |               |
|-----------------|------|-------|------|---------------|
| Time Bucket 4   | 1.57 | 0.86  | 1.37 | (0.58, 3.71)  |
| Time Bucket 5   | 3.66 | 18.16 | 1.71 | (0.47, 14.40) |
| Corticosteroids | 1.21 | 0.34  | 1.17 | (0.67, 2.00)  |

**d. Model 15.12: A sensitivity analysis of in-hospital mortality restricted to the Corticosteroid Domain ITT with factors for site and time removed**

- Population: Corticosteroid Domain ITT
- Endpoint: In-Hospital Mortality
- Model: Primary dichotomous model
- Factors: Age, sex, corticosteroid interventions: control, fixed-duration, shock-based
- Analysis: Conducted by the ITSC Analysis Center

**Notes**

1. The primary summary for the domain will be the probability that each intervention is in the optimal regimen. A 99% probability of being in the optimal regimen would hit the domain superiority statistical trigger.
2. Each intervention will be compared to the control arm. A posterior probability of superiority of 99% will be used as a statistical trigger for efficacy.
3. The two corticosteroid interventions will be compared for equivalence. A 90% probability of a smaller than 1.2 odds-ratio difference between the fixed-duration intervention and the shock-based intervention would hit the statistical trigger for equivalence.

Posterior probabilities for the in-hospital mortality endpoint in the Corticosteroid Domain ITT COVID population with site and time removed:

| Quantity of Interest                        | Posterior Probability |
|---------------------------------------------|-----------------------|
| Control arm is in the optimal regimen       | 0.08                  |
| Fixed-duration is in the optimal regimen    | 0.24                  |
| Shock-based is in the optimal regimen       | 0.68                  |
| Fixed-duration is superior to control       | 0.71                  |
| Shock-based is superior to control          | 0.88                  |
| Fixed-duration is equivalent to shock-based | 0.41                  |

Model 15.12 estimated odds ratios:

| Odds-Ratio Parameter | Mean | SD | Median | 95% Credible Interval |
|----------------------|------|----|--------|-----------------------|
|                      |      |    |        |                       |



|                                                                         |       |      |      |               |
|-------------------------------------------------------------------------|-------|------|------|---------------|
| Age < 39                                                                | 11.42 | 9.07 | 8.95 | (2.76, 34.48) |
| Age 40, 49                                                              | 4.06  | 1.94 | 3.63 | (1.66, 8.98)  |
| Age 50, 59                                                              | 2.22  | 0.70 | 2.11 | (1.18, 3.90)  |
| Age 70-79                                                               | 0.39  | 0.11 | 0.38 | (0.22, 0.66)  |
| Age 80+                                                                 | 0.51  | 0.29 | 0.44 | (0.16, 1.24)  |
| Female                                                                  | 1.11  | 0.29 | 1.07 | (0.66, 1.80)  |
| Fixed-duration<br>Corticosteroids                                       | 1.22  | 0.35 | 1.17 | (0.67, 2.03)  |
| Shock-based<br>Corticosteroids                                          | 1.45  | 0.42 | 1.39 | (0.80, 2.43)  |
| Shock-based<br>Corticosteroids vs.<br>Fixed-duration<br>corticosteroids | 0.88  | 0.25 | 0.84 | (0.48, 1.47)  |

## 10. MORTALITY

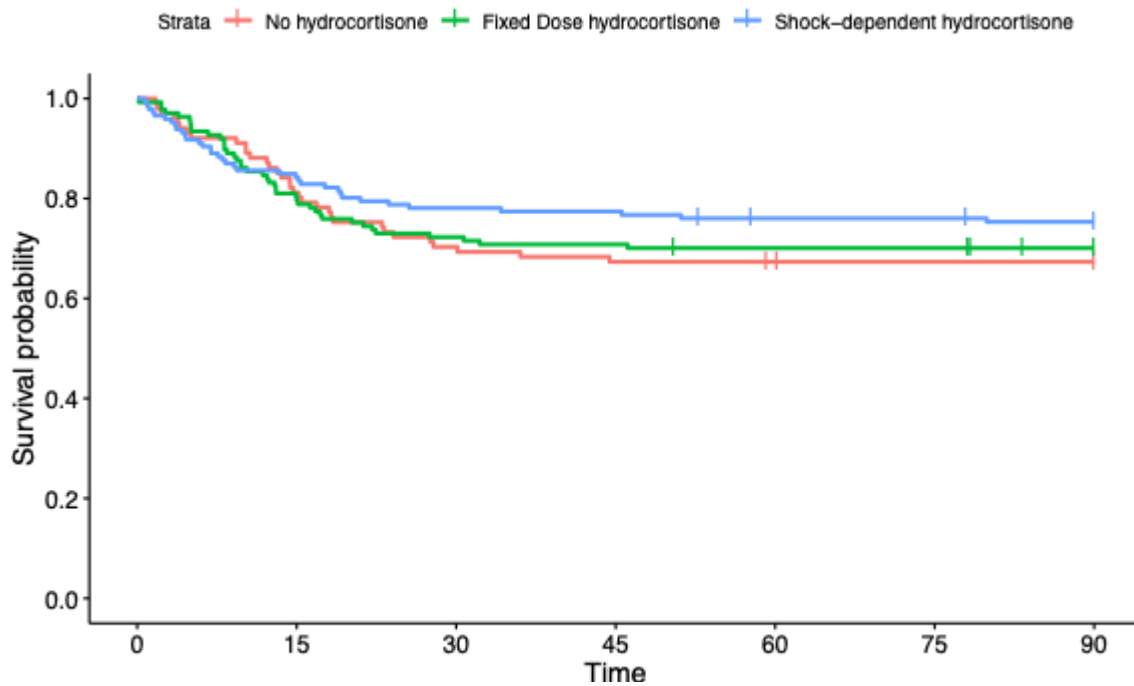

Figure 5: Kaplan Meier curve of 90-day mortality for each intervention in the Corticosteroid domain

Table 2: Summary of 2.5th, 10th, 25th percentiles from the Kaplan-Meier estimates for mortality. Displaying only the percentiles that are observed for this outcome.

|                                | <b>2.5th percentile</b> | <b>10th percentile</b> | <b>25th percentile</b> |
|--------------------------------|-------------------------|------------------------|------------------------|
| No corticosteroids             | 2.21                    | 10.22                  | 23.03                  |
| Fixed Duration Corticosteroids | 2.63                    | 8.19                   | 21.26                  |
| Shock-based Corticosteroids    | 1.44                    | 6.91                   | NA                     |

### **a. Model 15.13: A secondary analysis of Mortality**

- Population: Corticosteroid Domain ITT
- Endpoint: Mortality
- Model: Primary time to event model
- Factors: Age, sex, site, time, corticosteroid interventions: control, fixed-duration, shock-based
- Analysis: Conducted by the ITSC Analysis Center

#### **Notes**

1. The primary summary for the domain will be the probability that each intervention is in the optimal regimen. A 99% probability of being in the optimal regimen would hit the domain superiority statistical trigger.
2. Each intervention will be compared to the control arm. A posterior probability of superiority of 99% will be used as a statistical trigger for efficacy.
3. The two corticosteroid interventions will be compared for equivalence. A 90% probability of a smaller than 1.2 odds-ratio difference between the fixed-duration intervention and the shock-based intervention would hit the statistical trigger for equivalence.

Posterior probabilities for the time to mortality endpoint in the Corticosteroid Domain ITT population:

| <b>Quantity of Interest</b>              | <b>Posterior Probability</b> |
|------------------------------------------|------------------------------|
| Control arm is in the optimal regimen    | 0.38                         |
| Fixed-duration is in the optimal regimen | 0.27                         |
| Shock-based is in the optimal regimen    | 0.35                         |
| Fixed-duration is superior to control    | 0.40                         |
| Shock-based is superior to control       | 0.47                         |

|                                             |      |
|---------------------------------------------|------|
| Fixed-duration is equivalent to shock-based | 0.53 |
|---------------------------------------------|------|

Model 15.13 estimated odds-ratios:

| Odds-Ratio Parameter                                           | Mean  | SD     | Median | 95% Credible Interval |
|----------------------------------------------------------------|-------|--------|--------|-----------------------|
| Age < 39                                                       | 11.36 | 9.47   | 8.68   | (2.79, 35.57)         |
| Age 40, 49                                                     | 4.08  | 1.86   | 3.68   | (1.73, 8.83)          |
| Age 50, 59                                                     | 2.31  | 0.67   | 2.20   | (1.31, 3.93)          |
| Age 70-79                                                      | 0.33  | 0.07   | 0.32   | (0.21, 0.49)          |
| Age 80+                                                        | 0.40  | 0.21   | 0.35   | (0.14, 0.92)          |
| Female                                                         | 1.02  | 0.23   | 1.00   | (0.65, 1.54)          |
| Time Bucket 1                                                  | 0.94  | 0.11   | 0.94   | (0.75, 1.16)          |
| Time Bucket 2                                                  | 0.88  | 0.19   | 0.87   | (0.54, 1.27)          |
| Time Bucket 3                                                  | 1.16  | 0.30   | 1.11   | (0.70, 1.86)          |
| Time Bucket 4                                                  | 1.55  | 0.72   | 1.38   | (0.69, 3.31)          |
| Time Bucket 5                                                  | 5.86  | 174.49 | 1.83   | (0.58, 13.05)         |
| Fixed-duration Corticosteroids                                 | 0.97  | 0.22   | 0.94   | (0.61, 1.46)          |
| Shock-based Corticosteroids                                    | 1.01  | 0.23   | 0.98   | (0.63, 1.54)          |
| Shock-based Corticosteroids vs. Fixed-duration Corticosteroids | 0.99  | 0.25   | 0.96   | (0.59, 1.56)          |

## 11. PROGRESSION TO INTUBATION, ECMO, OR DEATH

Table 3: Summary of progression to intubation, ECMO, or death displayed for patients in the Corticosteroid ITT population for each intervention in the steroid domain and overall.

|                                | Number of patients not on MV or ECMO at baseline | Number of progressions of intubation, ECMO, or death | Rate of progression to intubation, ECMO, or death |
|--------------------------------|--------------------------------------------------|------------------------------------------------------|---------------------------------------------------|
| No corticosteroids             | 48                                               | 37                                                   | 0.77                                              |
| Fixed Duration Corticosteroids | 50                                               | 23                                                   | 0.46                                              |
| Shock-based Corticosteroids    | 70                                               | 42                                                   | 0.60                                              |
| Overall                        | 168                                              | 102                                                  | 0.61                                              |

**a. Model 15.14: A secondary analysis of progression to intubation, ECMO, or death, restricted to patients not on MV or ECMO at baseline**

- Population: Corticosteroid Domain ITT not on MV or ECMO at baseline.
- Endpoint: Progression to MV, ECMO, or death
- Model: Primary dichotomous model
- Factors: Age, sex, site, time, corticosteroid interventions: control, fixed-duration, shock-based
- Analysis: Conducted by the ITSC Analysis Center

**Notes**

1. The primary summary for the domain will be the probability that each intervention is in the optimal regimen. A 99% probability of being in the optimal regimen would hit the domain superiority statistical trigger.
2. Each intervention will be compared to the control arm. A posterior probability of superiority of 99% will be used as a statistical trigger for efficacy.
3. The two corticosteroid interventions will be compared for equivalence. A 90% probability of a smaller than 1.2 odds-ratio difference between the fixed-duration intervention and the shock-based intervention would hit the statistical trigger for equivalence.

Posterior probabilities for the progression to intubation, ECMO, or death endpoint:

| Quantity of Interest                        | Posterior Probability |
|---------------------------------------------|-----------------------|
| Control arm is in the optimal regimen       | 0.01                  |
| Fixed-duration is in the optimal regimen    | 0.97                  |
| Shock-based is in the optimal regimen       | 0.03                  |
| Fixed-duration is superior to control       | 0.99                  |
| Shock-based is superior to control          | 0.70                  |
| Fixed-duration is equivalent to shock-based | 0.06                  |

Model 15.14 estimated odds-ratios:

| Odds-Ratio Parameter                                           | Mean  | SD    | Median | 95% Credible Interval |
|----------------------------------------------------------------|-------|-------|--------|-----------------------|
| Age < 39                                                       | 13.16 | 11.09 | 10.09  | (2.68, 41.9)          |
| Age 40, 49                                                     | 3.00  | 1.57  | 2.66   | (1.02, 6.95)          |
| Age 50, 59                                                     | 0.99  | 0.43  | 0.91   | (0.40, 2.02)          |
| Age 70-79                                                      | 0.61  | 0.30  | 0.55   | (0.21, 1.35)          |
| Age 80+                                                        | 0.69  | 0.60  | 0.53   | (0.12, 2.17)          |
| Female                                                         | 0.60  | 0.24  | 0.56   | (0.25, 1.18)          |
| Time Bucket 1                                                  | 0.98  | 0.13  | 0.98   | (0.75, 1.25)          |
| Time Bucket 2                                                  | 1.04  | 0.29  | 1.02   | (0.54, 1.70)          |
| Time Bucket 3                                                  | 1.44  | 0.74  | 1.27   | (0.57, 3.27)          |
| Time Bucket 4                                                  | 2.39  | 2.92  | 1.6    | (0.47, 9.25)          |
| Fixed-duration Corticosteroids                                 | 3.02  | 1.40  | 2.74   | (1.18, 6.56)          |
| Shock-based Corticosteroids                                    | 1.36  | 0.59  | 1.24   | (0.56, 2.82)          |
| Shock-based Corticosteroids vs. Fixed-duration Corticosteroids | 2.40  | 1.06  | 2.20   | (0.99, 5.04)          |

## 12. DAYS-FREE OF VASOPRESSOR/INOTROPES USE

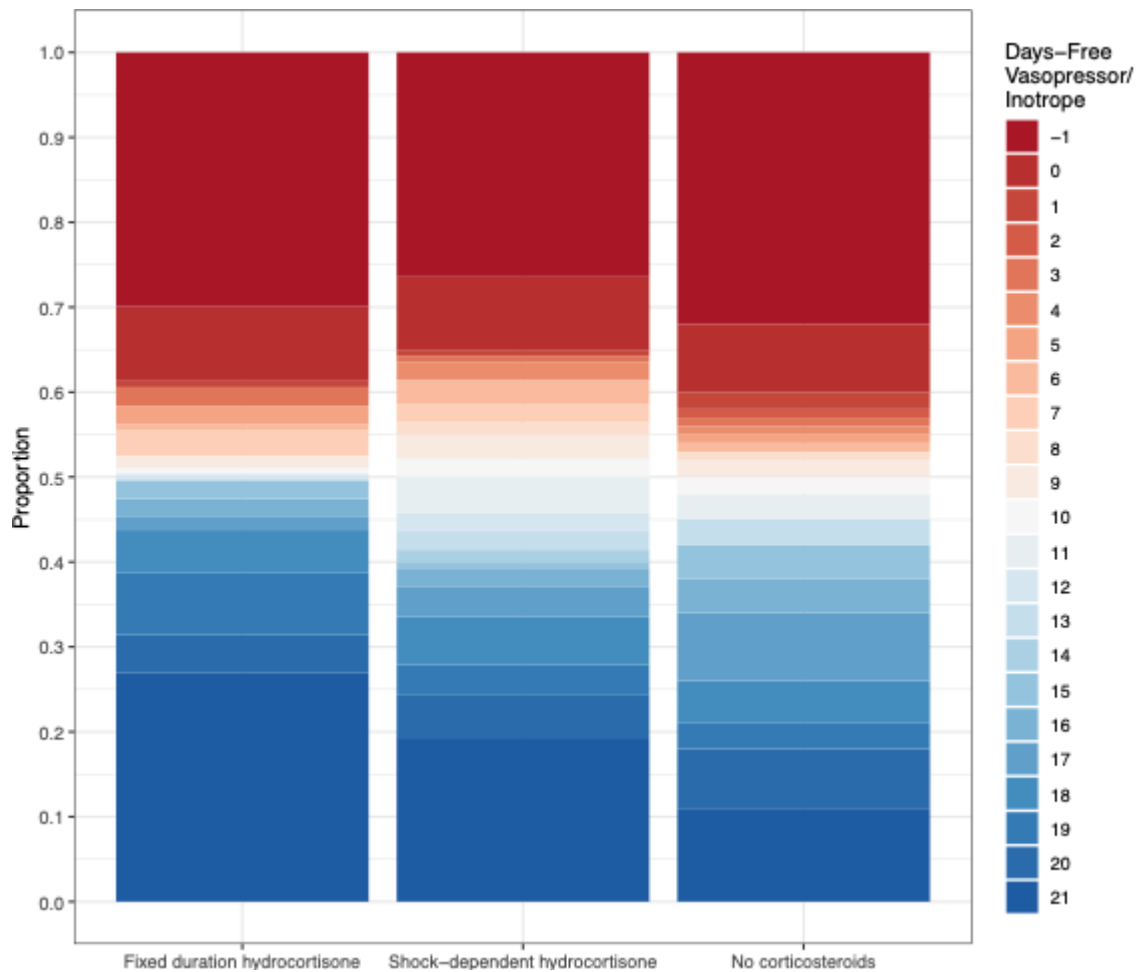

Figure 6: Empirical distribution of days-free of vasopressor/inotropes for each intervention in the Corticosteroid domain.

### a. Model 15.15: A secondary analysis of days-free of vasopressor/inotropes use

- Population: Corticosteroid Domain ITT.
- Endpoint: Vasopressor/Inotropes free-days
- Model: Primary dichotomous model
- Factors: Age, sex, site, time, corticosteroid interventions: control, fixed-duration, shock-based
- Analysis: Conducted by the ITSC Analysis Center

#### Notes

1. The primary summary for the domain will be the probability that each intervention is in the optimal regimen. A 99% probability of being in the optimal regimen would hit the domain superiority statistical trigger.
2. Each intervention will be compared to the control arm. A posterior probability of superiority of 99% will be used as a statistical trigger for efficacy.

- The two corticosteroid interventions will be compared for equivalence. A 90% probability of a smaller than 1.2 odds-ratio difference between the fixed-duration intervention and the shock-based intervention would hit the statistical trigger for equivalence.

Posterior probabilities for the days-free of vasopressor/inotropes use endpoint in the Corticosteroid Domain ITT population:

| Quantity of Interest                        | Posterior Probability |
|---------------------------------------------|-----------------------|
| Control arm is in the optimal regimen       | 0.01                  |
| Fixed-duration is in the optimal regimen    | 0.85                  |
| Shock-based is in the optimal regimen       | 0.14                  |
| Fixed-duration is superior to control       | 0.98                  |
| Shock-based is superior to control          | 0.86                  |
| Fixed-duration is equivalent to shock-based | 0.36                  |

Model 15.15 estimated odds-ratios:

| Odds-Ratio Parameter           | Mean | SD   | Median | 95% Credible Interval |
|--------------------------------|------|------|--------|-----------------------|
| Age < 39                       | 3.90 | 1.45 | 3.63   | (1.83, 7.34)          |
| Age 40, 49                     | 3.09 | 0.94 | 2.95   | (1.65, 5.32)          |
| Age 50, 59                     | 2.04 | 0.50 | 1.99   | (1.23, 3.17)          |
| Age 70-79                      | 0.41 | 0.11 | 0.40   | (0.23, 0.67)          |
| Age 80+                        | 0.57 | 0.32 | 0.49   | (0.17, 1.43)          |
| Female                         | 1.20 | 0.25 | 1.17   | (0.78, 1.76)          |
| Time Bucket 1                  | 0.92 | 0.10 | 0.91   | (0.74, 1.12)          |
| Time Bucket 2                  | 0.81 | 0.16 | 0.81   | (0.51, 1.15)          |
| Time Bucket 3                  | 0.84 | 0.21 | 0.82   | (0.51, 1.32)          |
| Time Bucket 4                  | 0.86 | 0.29 | 0.82   | (0.43, 1.57)          |
| Time Bucket 4                  | 1.00 | 0.62 | 0.85   | (0.33, 2.59)          |
| Fixed-duration Corticosteroids | 1.68 | 0.40 | 1.63   | (1.03, 2.59)          |
| Shock-based Corticosteroids    | 1.32 | 0.31 | 1.29   | (0.81, 2.02)          |

|                                                                |      |      |      |              |
|----------------------------------------------------------------|------|------|------|--------------|
| Shock-based Corticosteroids vs. Fixed-duration Corticosteroids | 1.30 | 0.30 | 1.27 | (0.81, 1.97) |
|----------------------------------------------------------------|------|------|------|--------------|

### 13. DAYS-FREE OF VENTILATION

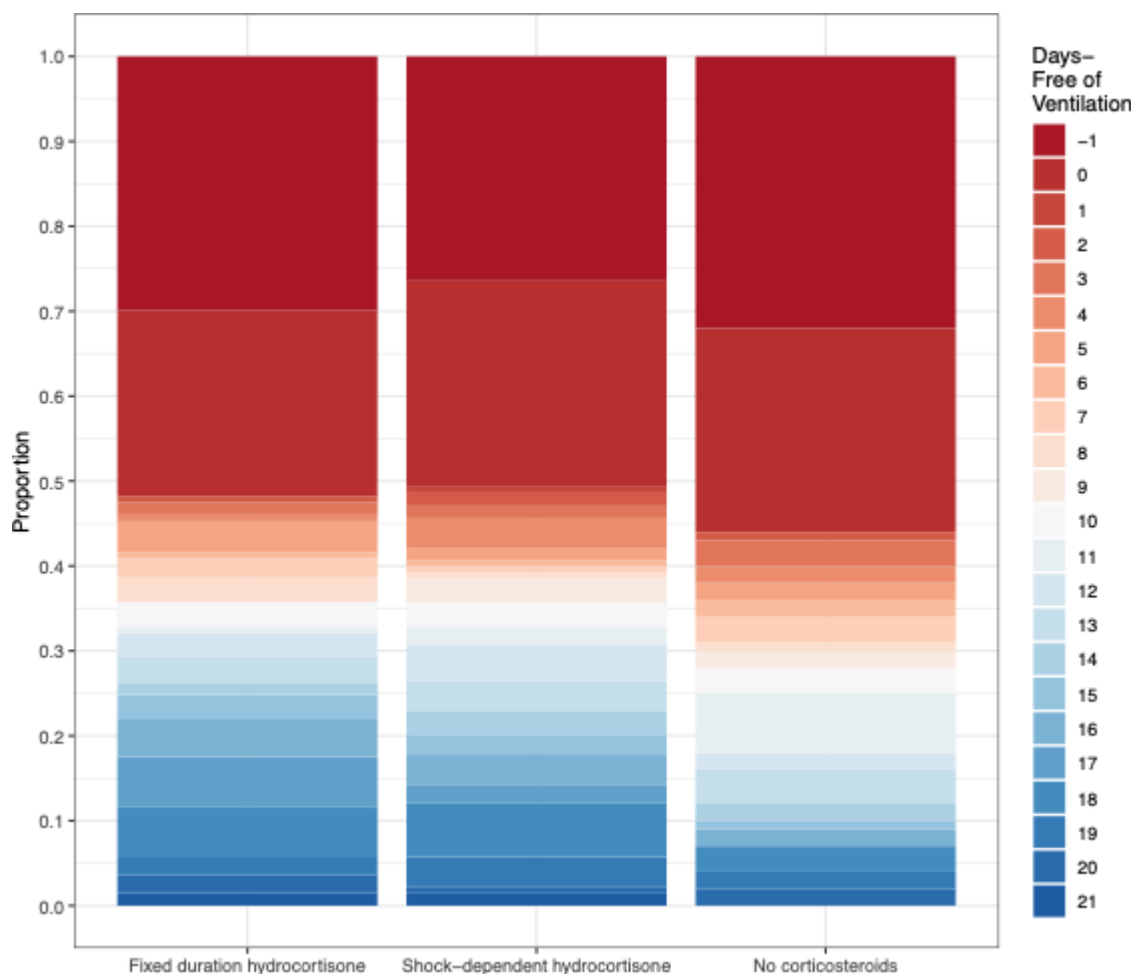

Figure 7: Empirical distribution of days-free of ventilation for each intervention in the Corticosteroid domain.

#### a. Model 15.16: A secondary analysis of days-free of ventilation

- Population: Corticosteroid Domain ITT.
- Endpoint: Ventilation free-days
- Model: Primary dichotomous model
- Factors: Age, sex, site, time, corticosteroid interventions: control, fixed-duration, shock-based
- Analysis: Conducted by the ITSC Analysis Center



## Notes

1. The primary summary for the domain will be the probability that each intervention is in the optimal regimen. A 99% probability of being in the optimal regimen would hit the domain superiority statistical trigger.
2. Each intervention will be compared to the control arm. A posterior probability of superiority of 99% will be used as a statistical trigger for efficacy.
3. The two corticosteroid interventions will be compared for equivalence. A 90% probability of a smaller than 1.2 odds-ratio difference between the fixed-duration intervention and the shock-based intervention would hit the statistical trigger for equivalence.

Posterior probabilities for the days-free of ventilation endpoint in the Corticosteroid Domain ITT population:

| Quantity of Interest                        | Posterior Probability |
|---------------------------------------------|-----------------------|
| Control arm is in the optimal regimen       | 0.03                  |
| Fixed-duration is in the optimal regimen    | 0.66                  |
| Shock-based is in the optimal regimen       | 0.30                  |
| Fixed-duration is superior to control       | 0.94                  |
| Shock-based is superior to control          | 0.85                  |
| Fixed-duration is equivalent to shock-based | 0.54                  |

Model 15.16 estimated odds ratios:

| Odds-Ratio Parameter | Mean | SD   | Median | 95% Credible Interval |
|----------------------|------|------|--------|-----------------------|
| Age < 39             | 4.45 | 1.63 | 4.19   | (2.12, 8.27)          |
| Age 40, 49           | 2.44 | 0.73 | 2.33   | (1.33, 4.19)          |
| Age 50, 59           | 1.94 | 0.48 | 1.88   | (1.18, 3.04)          |
| Age 70-79            | 0.42 | 0.12 | 0.40   | (0.23, 0.69)          |
| Age 80+              | 0.55 | 0.31 | 0.48   | (0.16, 1.36)          |
| Female               | 1.19 | 0.25 | 1.17   | (0.78, 1.76)          |
| Time Bucket 1        | 0.89 | 0.1  | 0.89   | (0.71, 1.1)           |
| Time Bucket 2        | 0.81 | 0.17 | 0.80   | (0.49, 1.17)          |

|                                                                |      |      |      |              |
|----------------------------------------------------------------|------|------|------|--------------|
| Time Bucket 3                                                  | 0.99 | 0.25 | 0.96 | (0.60, 1.56) |
| Time Bucket 4                                                  | 1.16 | 0.42 | 1.09 | (0.56, 2.18) |
| Time Bucket 5                                                  | 1.66 | 1.20 | 1.33 | (0.48, 4.95) |
| Fixed-duration Corticosteroids                                 | 1.45 | 0.34 | 1.42 | (0.90, 2.24) |
| Shock-based Corticosteroids                                    | 1.31 | 0.30 | 1.28 | (0.81, 2.00) |
| Shock-based Corticosteroids vs. Fixed-duration Corticosteroids | 1.14 | 0.26 | 1.11 | (0.72, 1.72) |

#### 14. LENGTH OF ICU STAY

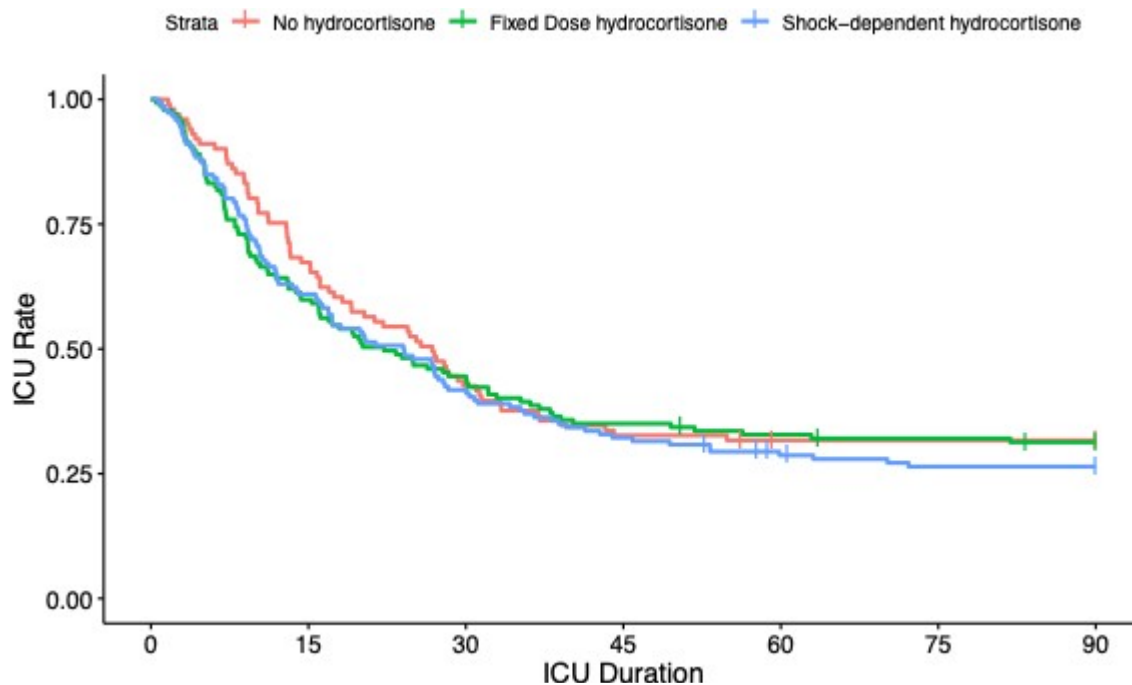

Figure 8: Kaplan Meier curve of ICU duration for each intervention in the Corticosteroid domain

Table 4: Summary of 2.5th, 10th, 25th and 50th percentiles from the Kaplan-Meier estimates for duration of ICU stay. Displaying only the percentiles that are observed for this outcome.

|                                | 2.5th percentile | 10th percentile | 25th percentile | 50th percentile |
|--------------------------------|------------------|-----------------|-----------------|-----------------|
| No corticosteroids             | 2.23             | 7.15            | 12.89           | 26.80           |
| Fixed Duration Corticosteroids | 2.02             | 4.04            | 8.01            | 22.21           |
| Shock-based Corticosteroids    | 1.63             | 3.97            | 9.05            | 24.09           |

**a. Model 15.17: A secondary analysis of length of ICU stay**

- Population: Corticosteroid Domain ITT
- Endpoint: Length of ICU stay
- Model: Primary TTE model
- Factors: Age, sex, site, time, corticosteroid interventions: control, fixed-duration, shock-based
- Analysis: Conducted by the ITSC Analysis Center

**Notes**

1. The primary summary for the domain will be the probability that each intervention is in the optimal regimen. A 99% probability of being in the optimal regimen would hit the domain superiority statistical trigger.
2. Each intervention will be compared to the control arm. A posterior probability of superiority of 99% will be used as a statistical trigger for efficacy.
3. The two corticosteroid interventions will be compared for equivalence. A 90% probability of a smaller than 1.2 hazard-ratio between the fixed-duration intervention and the shock-based intervention would hit the statistical trigger for equivalence.

Posterior probabilities for the length of ICU stay endpoint in the Corticosteroid Domain ITT population:

| Quantity of Interest                        | Posterior Probability |
|---------------------------------------------|-----------------------|
| Control arm is in the optimal regimen       | 0.65                  |
| Fixed-duration is in the optimal regimen    | 0.27                  |
| Shock-based is in the optimal regimen       | 0.09                  |
| Fixed-duration is superior to control       | 0.29                  |
| Shock-based is superior to control          | 0.14                  |
| Fixed-duration is equivalent to shock-based | 0.68                  |

Model 15.17 estimated hazard-ratios:

| Hazard-Ratio Parameter                                         | Mean | SD   | Median | 95% Credible Interval |
|----------------------------------------------------------------|------|------|--------|-----------------------|
| Age < 39                                                       | 2.76 | 0.66 | 2.68   | (1.68, 4.24)          |
| Age 40, 49                                                     | 2.23 | 0.44 | 2.19   | (1.49, 3.19)          |
| Age 50, 59                                                     | 1.53 | 0.25 | 1.51   | (1.10, 2.07)          |
| Age 70-79                                                      | 0.49 | 0.10 | 0.48   | (0.33, 0.70)          |
| Age 80+                                                        | 0.86 | 0.32 | 0.82   | (0.38, 1.61)          |
| Female                                                         | 1.11 | 0.16 | 1.10   | (0.83, 1.45)          |
| Time Bucket 1                                                  | 0.84 | 0.09 | 0.83   | (0.67, 1.02)          |
| Time Bucket 2                                                  | 0.70 | 0.12 | 0.70   | (0.49, 0.97)          |
| Time Bucket 3                                                  | 0.96 | 0.20 | 0.94   | (0.65, 1.41)          |
| Time Bucket 4                                                  | 0.90 | 0.24 | 0.87   | (0.51, 1.44)          |
| Time Bucket 5                                                  | 2.16 | 1.40 | 1.76   | (0.66, 5.87)          |
| Fixed-duration Corticosteroids                                 | 0.93 | 0.14 | 0.92   | (0.68, 1.24)          |
| Shock-based Corticosteroids                                    | 0.86 | 0.13 | 0.85   | (0.62, 1.15)          |
| Shock-based Corticosteroids vs. Fixed-duration Corticosteroids | 1.10 | 0.17 | 1.09   | (0.79, 1.48)          |

## 15. LENGTH OF HOSPITAL STAY

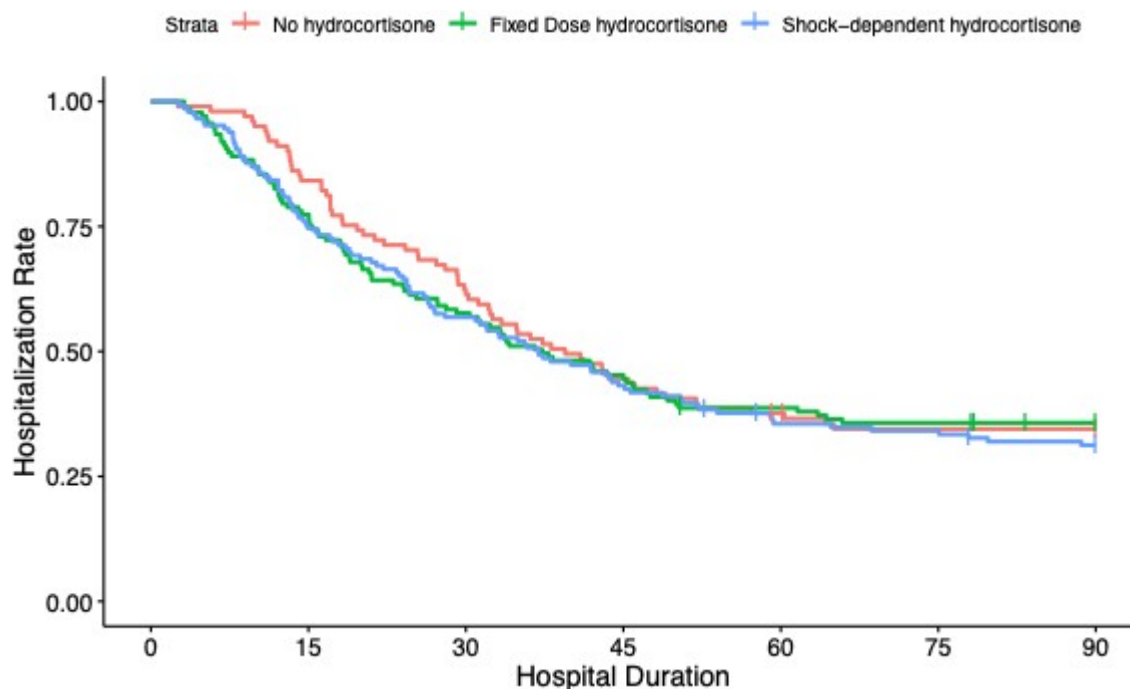

Figure 9: Kaplan Meier curve of hospital duration for each intervention in the Corticosteroid domain

Table 5: Summary of 2.5th, 10th, 25th and 50th percentiles from the Kaplan-Meier estimates for duration of hospital stay. Displaying only the percentiles that are observed for this outcome.

|                                | 2.5th percentile | 10th percentile | 25th percentile | 50th percentile |
|--------------------------------|------------------|-----------------|-----------------|-----------------|
| No corticosteroids             | 8.91             | 13.18           | 19.64           | 39.45           |
| Fixed Duration Corticosteroids | 4.86             | 7.36            | 15.34           | 37.28           |
| Shock-based Corticosteroids    | 4.10             | 8.44            | 14.92           | 36.93           |

### a. Model 15.18: A secondary analysis of length of hospital stay

- Population: Corticosteroid Domain ITT
- Endpoint: Length of Hospital stay
- Model: Primary TTE model
- Factors: Age, sex, site, time, corticosteroid interventions: control, fixed-duration, shock-based
- Analysis: Conducted by the ITSC Analysis Center

**Notes**

1. The primary summary for the domain will be the probability that each intervention is in the optimal regimen. A 99% probability of being in the optimal regimen would hit the domain superiority statistical trigger.
2. Each intervention will be compared to the control arm. A posterior probability of superiority of 99% will be used as a statistical trigger for efficacy.
3. The two corticosteroid interventions will be compared for equivalence. A 90% probability of a smaller than 1.2 hazard-ratio between the fixed-duration intervention and the shock-based intervention would hit the statistical trigger for equivalence.

Posterior probabilities for the length of hospital stay endpoint in the Corticosteroid Domain ITT population:

| Quantity of Interest                        | Posterior Probability |
|---------------------------------------------|-----------------------|
| Control arm is in the optimal regimen       | 0.47                  |
| Fixed-duration is in the optimal regimen    | 0.35                  |
| Shock-based is in the optimal regimen       | 0.18                  |
| Fixed-duration is superior to control       | 0.43                  |
| Shock-based is superior to control          | 0.31                  |
| Fixed-duration is equivalent to shock-based | 0.74                  |

Model 15.18 estimated hazard-ratios:

| Hazard-Ratio Parameter | Mean | SD   | Median | 95% Credible Interval |
|------------------------|------|------|--------|-----------------------|
| Age < 39               | 2.97 | 0.72 | 2.9    | (1.79, 4.58)          |
| Age 40, 49             | 2.55 | 0.5  | 2.51   | (1.71, 3.66)          |
| Age 50, 59             | 1.63 | 0.27 | 1.61   | (1.17, 2.25)          |
| Age 70-79              | 0.54 | 0.11 | 0.53   | (0.35, 0.79)          |
| Age 80+                | 0.62 | 0.25 | 0.59   | (0.25, 1.21)          |
| Female                 | 0.96 | 0.14 | 0.95   | (0.72, 1.26)          |
| Time Bucket 1          | 0.84 | 0.09 | 0.84   | (0.68, 1.02)          |
| Time Bucket 2          | 0.68 | 0.12 | 0.67   | (0.46, 0.94)          |
| Time Bucket 3          | 0.85 | 0.16 | 0.83   | (0.58, 1.21)          |

|                                                                         |      |      |      |              |
|-------------------------------------------------------------------------|------|------|------|--------------|
| Time Bucket 4                                                           | 0.93 | 0.26 | 0.9  | (0.53, 1.52) |
| Time Bucket 5                                                           | 1.81 | 1.18 | 1.49 | (0.59, 4.89) |
| Fixed-duration<br>Corticosteroids                                       | 0.99 | 0.16 | 0.97 | (0.72, 1.32) |
| Shock-based<br>Corticosteroids                                          | 0.94 | 0.15 | 0.93 | (0.69, 1.26) |
| Shock-based<br>Corticosteroids vs.<br>Fixed-duration<br>Corticosteroids | 1.06 | 0.17 | 1.05 | (0.77, 1.42) |

## 16. WHO ORDINAL SCALE

A 7-level approximation of the WHO ordinal scale was pre-specified for this analysis. This version of the WHO scale has a single level for patients discharged from the hospital. The WHO ordinal scale is assessed on *Study Day 14* and is defined as follows:

- 0 = discharged from hospital prior to day 14
- 3 = still in hospital but discharged from ICU on day 14
- 4 = in ICU on day 14 but not requiring any HFNO, NIV or invasive ventilation
- 5 = in ICU on day 14 and requiring HFNO or NIV
- 6 = in ICU on day 14 and requiring IMV (Only) without ECMO/ECCOR and without vasopressors and without RRT
- 7 = in ICU on day 14 and requiring IMV with ECMO/ECCOR or with vasopressors / inotropes or with RRT
- 8 = deceased before day 14.

Two patients were in the ICU on day 14 but had no data on organ support, so their WHO ordinal outcome was defined using the last ICU status carried forward. Both subjects were defined as WHO level 5. Three patients had no available data on ICU/hospital discharge dates or organ support, so they were excluded from the WHO analysis.

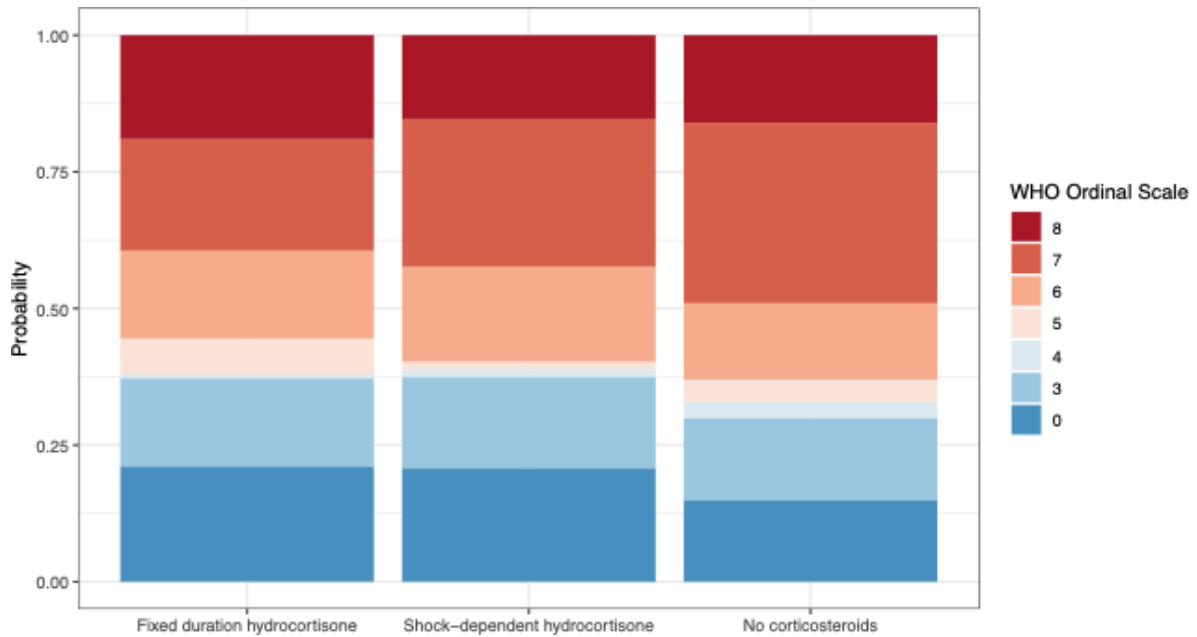

Figure 10: Empirical distribution of the WHO ordinal scale for each intervention in the Corticosteroid domain.

**a. Model 15.19: A secondary analysis of the WHO Ordinal Scale**

- Population: Corticosteroid Domain ITT
- Endpoint: WHO scale at 14-days
- Model: Primary Ordinal model
- Factors: Age, sex, site, time, corticosteroid interventions: control, fixed-duration, shock-based
- Analysis: Conducted by the ITSC Analysis Center

**Notes**

1. The primary summary for the domain will be the probability that each intervention is in the optimal regimen. A 99% probability of being in the optimal regimen would hit the domain superiority statistical trigger.
2. Each intervention will be compared to the control arm. A posterior probability of superiority of 99% will be used as a statistical trigger for efficacy.
3. The two corticosteroid interventions will be compared for equivalence. A 90% probability of a smaller than 1.2 hazard-ratio between the fixed-duration intervention and the shock-based intervention would hit the statistical trigger for equivalence.

Posterior probabilities for the WHO ordinal scale endpoint in the Corticosteroid Domain ITT population:

| Quantity of Interest                     | Posterior Probability |
|------------------------------------------|-----------------------|
| Control arm is in the optimal regimen    | 0.11                  |
| Fixed-duration is in the optimal regimen | 0.76                  |
| Shock-based is in the optimal regimen    | 0.13                  |
| Fixed-duration is superior to control    | 0.87                  |



|                                             |      |
|---------------------------------------------|------|
| Shock-based is superior to control          | 0.55 |
| Fixed-duration is equivalent to shock-based | 0.39 |

Model 15.19 estimated odds-ratios:

| Odds-Ratio Parameter                                           | Mean | SD   | Median | 95% Credible Interval |
|----------------------------------------------------------------|------|------|--------|-----------------------|
| Age < 39                                                       | 3.13 | 1.22 | 2.91   | (1.38, 6.09)          |
| Age 40, 49                                                     | 1.91 | 0.59 | 1.82   | (1.03, 3.30)          |
| Age 50, 59                                                     | 1.35 | 0.32 | 1.31   | (0.83, 2.08)          |
| Age 70-79                                                      | 0.43 | 0.12 | 0.41   | (0.25, 0.69)          |
| Age 80+                                                        | 0.62 | 0.35 | 0.54   | (0.19, 1.56)          |
| Female                                                         | 1.11 | 0.23 | 1.08   | (0.72, 1.62)          |
| Time Bucket 1                                                  | 0.86 | 0.10 | 0.85   | (0.67, 1.06)          |
| Time Bucket 2                                                  | 0.72 | 0.17 | 0.71   | (0.41, 1.06)          |
| Time Bucket 3                                                  | 0.87 | 0.22 | 0.85   | (0.52, 1.38)          |
| Time Bucket 4                                                  | 1.06 | 0.40 | 0.99   | (0.50, 2.05)          |
| Time Bucket 5                                                  | 1.87 | 1.66 | 1.39   | (0.45, 6.13)          |
| Fixed-duration Corticosteroids                                 | 1.33 | 0.32 | 1.29   | (0.83, 2.05)          |
| Shock-based Corticosteroids                                    | 1.06 | 0.26 | 1.03   | (0.65, 1.65)          |
| Shock-based Corticosteroids vs. Fixed-duration Corticosteroids | 1.29 | 0.29 | 1.25   | (0.81, 1.95)          |

## 17. SERIOUS ADVERSE EVENTS

Table 6: Summary of serious adverse events displayed for patients in the Corticosteroid ITT population for each intervention in the steroid domain and overall.

|                                | Number of patients | Number of SAEs | Rate of SAEs |
|--------------------------------|--------------------|----------------|--------------|
| No corticosteroids             | 101                | 1              | 0.01         |
| Fixed Duration Corticosteroids | 137                | 4              | 0.03         |
| Shock-based Corticosteroids    | 141                | 5              | 0.04         |
| Overall                        | 379                | 10             | 0.03         |

### a. Model 15.20: The primary safety analysis for the Corticosteroid Domain

- Population: Corticosteroid Domain ITT
- Endpoint: Serious Adverse Events (SAE)
- Model: Primary dichotomous model
- Factors: age, sex, site, corticosteroid interventions: control, fixed-duration, shock-based
- Analysis: Conducted by the ITSC Analysis Center

#### Notes

1. Each intervention will be compared to the control arm. A posterior probability of superiority of 99% will be used as a statistical trigger for efficacy. A posterior probability of 99% superiority of the control will be used for inferiority of the corticosteroids interventions
2. No information on the effects of the other domains or their interactions will be reported. This information will remain blinded until each domain/intervention reaches a conclusion.

Posterior probabilities for the Serious Adverse Events endpoint in the Corticosteroid Domain ITT population:

| Quantity of Interest                  | Posterior Probability |
|---------------------------------------|-----------------------|
| Fixed-duration is superior to control | 0.45                  |
| Shock-based is superior to control    | 0.39                  |

Model 15.20 estimated odds-ratios:

| Odds-Ratio Parameter | Mean | SD | Median | 95% Credible Interval |
|----------------------|------|----|--------|-----------------------|
|                      |      |    |        |                       |

|                                                                         |      |       |      |               |
|-------------------------------------------------------------------------|------|-------|------|---------------|
| Age < 39                                                                | 9.70 | 11.08 | 6.35 | (1.17, 38.93) |
| Age 40, 49                                                              | 4.46 | 4.56  | 3.16 | (0.73, 15.97) |
| Age 50, 59                                                              | 4.16 | 3.67  | 3.18 | (0.85, 13.28) |
| Age 70-79                                                               | 2.02 | 1.62  | 1.58 | (0.45, 6.35)  |
| Age 80+                                                                 | 1.90 | 1.99  | 1.33 | (0.27, 7.08)  |
| Female                                                                  | 1.93 | 1.46  | 1.53 | (0.45, 5.80)  |
| Fixed-duration<br>Corticosteroids                                       | 1.13 | 0.80  | 0.92 | (0.27, 3.16)  |
| Shock-based<br>Corticosteroids                                          | 1.04 | 0.76  | 0.83 | (0.23, 3.04)  |
| Shock-based<br>Corticosteroids vs.<br>Fixed-duration<br>Corticosteroids | 1.43 | 1.19  | 1.09 | (0.27, 4.51)  |

## **eAppendix 5. The REMAP-CAP Investigators**

### **International Trial Steering Committee**

Farah Al-Beidh, Derek Angus, Djillali Annane, Yaseen Arabi, Wilma van Bentum-Puijk, Scott Berry, Abigail Beane, Zahra Bhimani, Marc Bonten, Charlotte Bradbury, Frank Brunkhorst, Meredith Buxton, Allen Cheng, Menno De Jong, Lennie Derde, Lise Estcourt, Herman Goossens, Anthony Gordon, Cameron Green, Rashan Haniffa, Francois Lamontagne, Patrick Lawler, Edward Litton, John Marshall, Colin McArthur, Daniel McAuley, Shay McGuinness, Bryan McVerry, Stephanie Montgomery, Paul Mouncey, Srinivas Murthy, Alistair Nichol, Rachael Parke, Jane Parker, Kathryn Rowan, Christopher Seymour, Anne Turner, Frank van de Veerdonk, Steve Webb (Chair), Ryan Zarychanski;

### **Regional Management Committees**

#### ***Australia and New Zealand***

Yaseen Arabi, Lewis Campbell, Allen Cheng, Lennie Derde, Andrew Forbes, David Gattas, Cameron Green, Stephane Heritier, Lisa Higgins, Peter Kruger, Edward Litton, Colin McArthur (Deputy Executive Director), Shay McGuinness (Chair), Alistair Nichol, Rachael Parke, Jane Parker, Sandra Peake, Jeffrey Presneill, Ian Seppelt, Tony Trapani, Anne Turner, Steve Webb (Executive Director), Paul Young

#### ***Canadian Regional Management Committee***

Sean Bagshaw, Zahra Bhimani, Nick Daneman, Niall Ferguson, Francois Lamontagne, John Marshall (Executive Director) Cheryl Misak, Srinivas Murthy (Deputy Executive Director), Marlene Santos

#### ***European Regional Management Committee***

Farah Al-Beidh, Derek Angus, Wilma van Bentum-Puijk, Scott Berry, Marc Bonten (Executive Director), Frank Brunkhorst, Lennie Derde (Deputy Executive Director and Chair), Herman Goossens, Anthony Gordon, Sebastiaan Hullegie, Colin McArthur, Paul Mouncey, Alistair Nichol, Mathias Pletz, Gernot Rohde, Kathy Rowan, Steve Webb

#### ***United States Regional Management Committee***

Brian Alexander, Derek Angus (Executive Director), Kim Basile, Meredith Buxton (Chair), Timothy Girard, Christopher Horvat, David Huang, Kelsey Linstrum, Bryan McVerry, Stephanie Montgomery, Christopher Seymour, Jennifer Vates

### **Regional Coordinating Centers**

***Australia and Saudi Arabia:*** The Australia and New Zealand Intensive Care Research Centre (ANZIC-RC), Monash University

***Canada:*** St. Michael's Hospital, Unity Health Toronto

***Europe:*** University Medical Centre Utrecht

***Germany:*** Universitätsklinikum Jena

***Ireland:*** Irish Critical Care Clinical Trials Network, University College Dublin Research Centre, St. Vincent's Hospital

***New Zealand:*** The Medical Research Institute of New Zealand (MRINZ)

***United Kingdom:*** Intensive Care National Audit and Research Centre (ICNARC), and Imperial College London

***United States:*** Global Coalition for Adaptive Research (GCAR), and University of Pittsburgh

### **Domain-Specific Working Groups**

#### ***Antibiotic and Macrolide Duration Domain-Specific Working Group***

Richard Beasley, Marc Bonten, Allen Cheng (Chair), Nick Daneman, Lennie Derde, Robert Fowler, David Gattas, Anthony Gordon, Cameron Green, Peter Kruger, Colin McArthur, Steve McGloughlin, Susan Morpeth, Srinivas Murthy, Alistair Nichol, Mathias Pletz, David Paterson, Gernot Rohde, Steve Webb

#### ***Corticosteroid Domain-Specific Working Group***

Derek Angus (Chair), Wilma van Bentum-Puijk, Lennie Derde, Anthony Gordon, Sebastiaan Hullegie, Peter

Kruger, Edward Litton, John Marshall, Colin McArthur, Srinivas Murthy, Alistair Nichol, Bala Venkatesh, Steve Webb

***Influenza Antiviral Domain-Specific Working Group***

Derek Angus, Scott Berry, Marc Bonten, Allen Cheng, Lennie Derde, Herman Goossens, Sebastiaan Hullegie, Menno de Jong, John Marshall, Colin McArthur, Srinivas Murthy (Chair), Tim Uyeki, Steve Webb

***COVID-19 Antiviral Domain-Specific Working Group***

Derek Angus, Yaseen Arabi (Chair), Kenneth Baillie, Richard Beasley, Scott Berry, Marc Bonten, Allen Cheng, Menno de Jong, Lennie Derde, Eamon Duffy, Rob Fowler, Herman Goossens, Anthony Gordon, Cameron Green, Thomas Hills, Colin McArthur, Susan Morpeth, Srinivas Murthy, Alistair Nichol, Katrina Orr, Rachael Parke, Jane Parker, Asad Patanwala, Kathy Rowan, Steve Tong, Tim Uyeki, Frank van de Veerdonk, Steve Webb

***COVID-19 Immune Modulation Domain-Specific Working Group***

Derek Angus, Yaseen Arabi, Kenneth Baillie, Richard Beasley, Scott Berry, Marc Bonten, Frank Brunkhorst, Allen Cheng, Menno de Jong, Eamon Duffy, Lennie Derde (Chair), Herman Goossens, Anthony Gordon, Cameron Green, Thomas Hills, John Marshall, Colin McArthur, Susan Morpeth, Srinivas Murthy, Mihai Netea, Alistair Nichol, Katrina Orr, Rachael Parke, Jane Parker, Asad Patanwala, Kathy Rowan, Steve Tong, Tim Uyeki, Frank van de Veerdonk, Steve Webb

***Therapeutic Anticoagulation Domain-Specific Working Group***

Derek Angus, Scott Berry, Shilesh Bihari, Charlotte Bradbury, Marc Carrier, Dean Fergusson, Robert Fowler, Timothy Girard, Ewan Goligher (Deputy Chair), Anthony Gordon, Ghady Haidar, Christopher Horvat, David Huang, Beverley Hunt, Anand Kumar, Mike Laffan, Patrick Lawler, Patrick Lawless, Sylvain Lothier, Peter McCallum, Colin McArthur, Bryan McVerry, John Marshall, Saskia Middeldopr, Zoe McQuilten, Matthew Neal, Alistair Nichol, John Pasi, Christopher Seymour, Roger Schutgens, Simon Stanworth, Alexis Turgeon, Steve Webb, Alexandra Weissman, Ryan Zarychanski (Chair)

***Vitamin C Domain-Specific Working Group***

Neill Adhikari (Chair), Derek Angus, Djillali Annane, Matthew Anstey, Yaseen Arabi, Scott Berry, Emily Brant, Angeliq de Man, Lennie Derde, Anthony Gordon, Cameron Green, David Huang, Francois Lamongne (Chair), Edward Litton, John Marshall, Marie-Helene Masse, Colin McArthur, Shay McGuinness, Paul Mouncey, Srinivas Murthy, Rachael Parke, Alistair Nichol, Tony Trapani, Andrew Udy, Steve Webb

***COVID-19 Immunoglobulin Domain-Specific Working Group***

Derek Angus, Donald Arnold, Phillippe Begin, Scott Berry, Richard Charlewood, Michael Chasse, Mark Coyne, Jamie Cooper, James Daly, Lise Estcourt (Chair, UK lead), Dean Fergusson, Anthony Gordon, Iain Gosbell, Heli Harvala-Simmonds, Tom Hills (New Zealand lead), Christopher Horvat, David Huang, Sheila MacLennan, John Marshall, Colin McArthur (New Zealand lead), Bryan McVerry (USA lead), David Menon, Susan Morpeth, Paul Mouncey, Srinivas Murthy, John McDyer, Zoe McQuilten (Australia lead), Alistair Nichol (Ireland lead), Nicole Pridee, David Roberts, Kathy Rowan, Christopher Seymour, Manu Shankar-Hari (UK lead), Helen Thomas, Alan Tinmouth, Darrell Triulzi, Alexis Turgeon (Canada lead), Tim Walsh, Steve Webb, Erica Wood, Ryan Zarychanski (Canada lead)

***Simvastatin Domain-Specific Working Group***

Derek Angus, Yaseen Arabi, Carolyn Calfee, Anthony Gordon, Cameron Green, Peter Kruger, Patrick Lawler, Edward Litton, Colin McArthur, Daniel McAuley (Chair), Bryan McVerry, Matthew Neal, Alistair Nichol, Cecilia O’Kane, Murali Shyamsundar, Pratik Sinha, Taylor Thompson, Steve Webb, Ian Young

***Antiplatelet Domain-Specific Working Group***

Derek Angus, Scott Berry, Shailesh Bihari, Charlotte Bradbury (Chair), Marc Carrier, Timothy Girard, Ewan Goligher, Anthony Gordon, Ghady Haidar, Christopher Horvat, David Huang, Beverley Hunt, Anand Kumar, Patrick Lawler, Patrick Lawless, Colin McArthur, Bryan McVerry, John Marshall, Zoe McQuilten, Matthew Neal, Alistair Nichol, Christopher Seymour, Simon Stanworth, Steve Webb, Alexandra Weissman, Ryan Zarychanski

### **Mechanical Ventilation Domain**

Derek Angus, Wilma van Bentum-Puijk, Lewis Campbell, Lennie Derde, Niall Ferguson, Timothy Girard, Ewan Goligher, Anthony Gordon, Cameron Green, Carol Hodgson, Peter Kruger, John Laffey, Edward Litton, John Marshall, Colin McArthur, Danny McAuley, Shay McGuinness, John Laffey, Neil Orford, Kathy Rowan, Ary Neto, Steve Webb

### **Statistical Analysis Committee**

Michelle Detry, PhD, Mark Fitzgerald, PhD, Roger Lewis, PhD (Chair), Anna McGlothlin, PhD, Ashish Sanil, PhD, Christina Saunders, PhD

### **Statistical Design Team**

Lindsay Berry, PhD, Scott Berry, PhD, Elizabeth Lorenzi, PhD

### **Project Management**

**Australia:** Jane Parker, Eliza Miller, Vanessa Singh, Claire Zammit

**Canada:** Zahra Bhimani, Marlene Santos

**Europe:** Wilma van Bentum Puijk, Wietske Bouwman, Yara Mangindaan, Lorraine Parker, Svenja Peters, Ilse Rietveld, Kik Raymakers, Radhika Ganpat;

**Germany:** Nicole Brillinger, Rene Markgraf

**Global:** Cameron Green

**Ireland:** Kate Ainscough, Kathy Brickell

**New Zealand:** Anne Turner

**United Kingdom:** Farah Al-Beidh, Aisha Anjum, Janis-Best Lane, Paul Mouncey, Alvin Richards-Belle, Michelle Saull, Daisy Wiley

**United States:** Kim Basile, Meredith Buxton, Kelsey Linstrum, Stephanie Montgomery

### **Data Safety Monitoring Board**

Julian Bion, MD, Jason Connor, PhD (Deputy Chair), Simon Gates, PhD, Victoria Manax, MD (Chair), Tom van der Poll, PhD, John Reynolds, PhD.

### **Database Providers**

**Research Online:** Marloes van Beurden, Evelien Effelaar, Joost Schotsman,

**Spinnaker Software:** Craig Boyd, Cain Harland, Audrey Shearer, Jess Wren

**UPMC Health System:** Giles Clermont, William Garrard, Christopher Horvat, Kyle Kalchthaler, Andrew King, Daniel Ricketts, Salim Malakoutis, Oscar Marroquin, Edvin Music, Kevin Quinn

### **Clinical Trials Groups**

The REMAP-CAP platform is supported by the Australian and New Zealand Intensive Care Society Clinical Trials Group, the Canadian Critical Care Clinical Trials Group, the Irish Critical Care Clinical Trials Network, the UK Critical Care Research Group and the International Forum of Acute Care Trialists.

REMAP-CAP was supported in the UK by the NIHR Clinical Research Network and we acknowledge the contribution of Heidi Cate (Eastern), Karen Pearson (East Midlands), Joanne Collins (Greater Manchester), Jane Hanson (Kent, Surrey and Sussex), Penny Williams (North East and North Cumbria), Shane Jackson (Northern Ireland), Adeeba Asghar (North Thames), Sarah Dyas (North West Coast), Mihaela Sutu and Sheenagh Murphy (North West London), Dawn Williamson (Scotland), Nhlanhla Mguni (South London), Alison Potter (South West Peninsula), David Porter (Thames Valley and South Midlands), Jayne Goodwin (Wales), Clare Rook (Wessex), Susie Harrison (West Midlands), Hannah Williams (West of England), Hilary Campbell (Yorkshire and Humber), Kaatje Lomme, James Williamson, Jonathan Sheffield, and Willian van't Hoff (CRN Coordinating Centre)

### **Site Investigators and Research Coordinators**

#### ***Australia***

*The Alfred Hospital:* Andrew Udy, PhD, Phobe McCracken, MPH, Meredith Young, MPH, Jasmin Board, MPH,

© 2020 American Medical Association. All rights reserved.

Emma Mart, BPharmSc;

*Bendigo Hospital:* Cameron Knott, FCICM, Julie Smith, PGDip, Catherine Boschert, PGDip;

*Caboolture Hospital:* Julia Affleck, MBiotech, Mahesh Ramanan, FCICM, Ramsy D'Souza, FCICM, Kelsey Pateman, PhD, Arif Shakih, FCICM, Arif Shakih, FCICM;

*Concord Repatriation General Hospital:* Winston Cheung, MBChB, Mark Kol, MBBS, Helen Wong, Asim Shah, MBChB, Dr Atul Wagh, MBBS;

*Eastern Health (Box Hill, Maroondah & Angliss Hospitals):* Joanne Simpson, FCICM, Graeme Duke, FCICM, Peter Chan, FCICM, Brittney Cartner, PGCert, Stephanie Hunter, MN;

*Flinders Medical Centre:* Shailesh Bihari, PhD, Russell D Laver, FCICM, Tapaswi Shrestha, MN;

*Fiona Stanley Hospital:* Edward Litton, FCICM, Adrian Regli, FCICM, Susan Pellicano, PGCert, Annamaria Palermo, BA, Ege Eroglu, BSc(Hons);

*Gold Coast University Hospital:* James McCullough, FCICM, Mandy Tallott, MN;

*John Hunter Hospital:* Nikhil Kumar, MBBS, Rakshit Panwar, FCICM, Gail Brinkerhoff, PGCert, Cassandra Koppen, BPharm, Federica Cazzola, MBBS;

*Launceston General Hospital:* Matthew Brain, FCICM, Sarah Mineall, MCLinNurse

*Lyell McEwin Hospital:* Roy Fischer, FCICM, Vishwanath Biradar, FCICM, Natalie Soar, BSN;

*Logan Hospital:* Hayden White, PhD, Kristen Estensen, MBBS, Lynette Morrison, PGCert CCN, Joanne Smith, RN, Melanie Cooper, PGCert CCN

*Monash Health (Monash Medical Centre, Dandenong Hospital & Casey Hospital):* Yahya Shehabi, PhD, Wisam Al-Bassam, MBChB, Amanda Hulley;

*Nepean Hospital:* Ian Seppelt PhD, Christina Whitehead, MN, Julie Lowrey, BN, Rebecca Gresha, BN;

*Princess Alexandra Hospital:* Peter Kruger, PhD, James Walsham, FCICM, Mr Jason Meyer, BN, Meg Harward, MN, Ellen Venz, PGCert;

*The Queen Elizabeth Hospital:* Sandra Peake, PhD, Patricia Williams, BNP, Catherine Kurenda,

*Royal Darwin Hospital:* Lewis Campbell, MSc, Kirsy Smith, PGCert, Margaret Smith, MN, Rebecca Garcia, PGDip;

*Royal Melbourne Hospital:* Jeffrey Presneill, PhD, Deborah Barge, CCRN, Kathleen Byrne, MNsc, Alana Driscoll GDipN, Louise Fortune, MNsc;

*Royal North Shore Hospital:* Pierre Janin, MD, Elizabeth Yarad, MN, Naomi Hammond, PhD, Frances Bass, MSc, Angela Ashelford, BN;

*Royal Perth Hospital:* Sharon Waterson, PGCert, Steve Wedd, PhD, Robert McNamara, BMBS;

*Royal Prince Alfred Hospital:* David Gattas, MMed(ClinEpid), Heidi Buhr, MScMed(ClinEpid), Jennifer Coles, PGDip;

*Sir Charles Gardiner Hospital:* Sacha Schweikert, FCICM, Bradley Wibrow, FCICM, Matthew Anstey, FCICM, Rashmi Rauniyar, MPH, Erina Myers, PGCert;

*St. John of God Midland Public and Private Hospitals:* Ed Fysh, PhD, Ashlish Dawda, MD, Bhaumik Mevavala, MHA;

*St. John of God Hospital, Murdoch:* Annamaria Palermo, BA, Adrian Regli, Bart De Keulenaer;

*St. John of God Hospital, Subiaco:* Ed Litton, PhD, Janet Ferrier, BSc;

*St. Vincent's Hospital (NSW):* Priya Nair, PhD, Hergen Buscher, FCICM, Claire Reynolds, MCLinNurse, Ben Cullinger, MBBS;

*St. Vincent's Hospital (VIC):* John Santamaria, MD, Leanne Barbazza, PGCertAdvNurse, Jennifer Homes, PGDipAdvNurs, Roger Smith, MPH;

*Sunshine Coast University Hospital:* Peter Garrett, FCICM, Lauren Murray, MSc, Jane Brailsford, PGCert, Loretta Forbes, PGCert, Teena Maguire, BA;

*Toowoomba Hospital:* Vasanth Mariappa, FCICM, Judith Smith, PGCert;

*University Hospital Geelong:* Scott Simpson, MBBS, Matthew Maiden, PhD, Allsion Bone, PGDip, Michelle Horton, MN, Tania Salerno, PGCert;

*Wollongong Hospital:* Martin Sterba, PhD, Wenli Geng, MN;

## **Belgium**

*Ghent University Hospital:* Pieter Depuydt, PhD, Jan De Waele, PhD, Liesbet De Bus, PhD, Jan Fierens, MD, Stephanie Bracke, BSc;

## **Canada**

*Brantford General Hospital:* Brenda Reeve, MD, William Dechert, MSc;

*Centre Hospitalier de l'Université de Montreal:* Michaël Chassé, PhD, François Martin Carrier, MSc, Dounia Boumahni, BSc, Fatna Benettaib, MSc., Ali Ghamraoui, BSc;

*CHU de Québec – Université Laval:* Alexis Turgeon, MSc, David Bellemare, BSc, Ève Cloutier, François Lauzier, MSc, Charles Francoeur, MSc;

*Centre Hospitalier Universitaire de Sherbrooke:* François Lamontagne, MD, Frédérick D'Aragon, MD, Elaine Carbonneau, BACC, Julie Leblond, BACC;

*Health Sciences Centre, Winnipeg:* Ryan Zarychanski, MD, Gloria Vazquez-Grande, MD, Nicole Marten, RN, Maggie Wilson, MSc;

*Hôpital du Sacré Coeur de Montréal:* Martin Albert, MD, Karim Serri, MD, Alexandros Cavayas, MD, Mathilde Duplaix, MSc, Virginie Williams, PhD;

*Juravinski Hospital:* Bram Rochweg, MD, Tim Karachi, MD, Simon Oczkowski, MD, John Centofanti, MD, Tina Millen, RRT

*Niagara Health (St. Catherine's Hospital):* Erick Duan, MD, Jennifer Tsang, MD, Lisa Patterson, BA;

*The Ottawa Hospital:* Shane English, MSc, Irene Watpool, BScN, Rebecca Porteous, BSN, Sydney Miezitis, BSc, Lauralyn McIntyre, MSc;

*St. Michael's Hospital:* John Marshall, MD, Laurent Brochard, MD, Karen Burns, MD, Gyan Sandhu, RN, Imrana Khalid, MD;

*William Osler Health System:* Alexandra Binnie, MD, Elizabeth Powell, MD, Alexandra McMillan, MD, Tracy Luk, MD, Noah Aref, MSc

## **Croatia**

*General Hospital Pozega:* Zdravko Andric, Sabina Cviljevic, Renata Đimoti, Marija Zapalac, Gordan Mirković;

*University Hospital of Infectious Diseases "Dr Fran Milhajevid":* Bruno Baršić, Marko Kutleša, Viktor Kotarski, ;

*University Hospital of Zagreb:* Ana Vujaklija Brajković, Jakša Babel, Helena Sever, Lidija Dragija, Ira Kušan;

## **Finland**

*Helsinki University Hospital:* Suvi Vaara, Leena Pettilä, Jonna Heinonen;

*Tampere University Hospital:* Anne Kuitunen, PhD, Sari Karlsson, PhD, Annukka Vahtera, MD, Heikki Kiiski, PhD, Sanna Ristimäki;

## **France**

*Ambroise Pare Hospital:* Amine Azaiz, Cyril Charron, MD, Mathieu Godement, MD, Guillaume Geri, Antoine Vieillard-Baron;

*Centre Hospitalier de Melun:* Franck Pourcine, Mehran Monchi;

*Centre Hospitalier Simone Veil:* David Luis, MSc, Romain Mercier, MD, Anne Sagnier, MD, Nathalie Verrier, MD, Cecile Caplin, MD;

*Centre Hospitalier Sud Essonne:* Shidasp Siami, PhD, Christelle Aparicio, Sarah Vautier, Asma Jebblaoui, Delphine Lemaire-Brunel;

*Centre Hospitalier Tenon:* Muriel Fartoukh, Laura Courtin, Vincent Labbe, MD;

*Centre Hospitalier Victor Dupouy:* Gaetan Plantefeve, Cécile Leparco, RN;

*CHR d'Orleans:* Grégoire Muller, MD, Mai-Anh Nay, MD, Toufik Kamel, MD, Dalila Benzekri, MD, Sophie Jacquier, MD;

*CHRU Tours Hopital Bretonneau:* Emmanuelle Mercier, MD, Delphine Chartier, Charlotte Salmon, MD, Pierre-François Dequin, PhD, Denis GAROT, MD;



*CHU Dupuytren, Limoges;*

*Hôpital civil, Hôpitaux Universitaires de Strasbourg;*

*Hopital de Haute-pierre: Francis Schneider, PhD, Guillaume Morel, MD, Sylvie L'Hotellier, MSc;*

*Hospital Nord Franche-Comté: Julio Badie, MD., Fernando Daniel Berdaguer, MD, Sylvain Malfroy, MD, Chaouki Mezher, MD, Charlotte Bourgoin, MS;*

*Lariboisière Hospital: Bruno Megarbane, PhD, Sebastian Voicu, PhD, Nicolas Deye, PhD, Isabelle Malissin, MD, Laetitia Sutterlin, MD;*

*Le Mans Hospital: Christophe Guitton, PhD, Cédric Darreau, MD, Mickaël Landais, MD, Nicolas Chudeau, MD, Alain Robert, PhD;*

*Raymond Poincaré Hospital: Pierre Moine, MD, Nicholas Heming, MD, Virginie Maxime, MD, Isabelle Bossard, Tiphaine Barbarin Nicholier;*

*Vendee Hospital: Gwenhael Colin, MD, Vanessa Zinzoni, Natacham Maquigneau;*

### **Germany**

*Charité - Universitätsmedizin Berlin: André Finn, MD, Gabriele Kreß, Uwe Hoff, MD, Carl Friedrich Hinrichs, MD, Jens Nee, MD;*

*Jena University Hospital: Mathias W. Pletz, PhD, Stefan Hagel, PhD, Juliane Ankert, MSc, Steffi Kolanos, BSc, Frank Bloos, PhD;*

*University Hospital of Leipzig: Sirak Petros, MD, Bastian Pasiëka, MD, Kevin Kunz, MD, Peter Appelt, MD, Bianka Schütze, BSc;*

*Universitätsklinikum Hamburg-Eppendorf: Stefan Kluge, Axel Nierhaus, Dominik Jarczak, Kevin Roedl;*

*University Hospital of Wuerzburg: Dirk Weismann, MD, Anna Frey, MD;*

*Vivantes Klinikum Neukölln: Lorenz Reill, Michael Distler, MD, Astrid Maselli;*

### **Hungary**

*Almási Balogh Pál Hospital, Ózd: János Bélteczki, István Magyar, Ágnes Fazekas, Sándor Kovács, Viktória Szőke;*

*Jósa András County Hospital, Nyíregyháza: Gábor Szigligeti, János Leszkoven;*

### **Ireland**

*Beacon Hospital Dublin: Daniel Collins, MRCPI, Patrick Breen, MSc, Stephen Frohlich, PhD, Ruth Whelan;*

*Galway University Hospitals: John Laffey, MD, Bairbre McNicholas, PhD, Michael Scully, MD, Siobhan Casey, RN, Maeve Kernan, RN;*

*St Vincent's University Hospital, Dublin: Peter Doran, PhD, Michael O'Dywer, PhD, Kathy Brickell, RGN, Michelle Smyth, PGDip, Leanne Hayes, PhD;*

### **Netherlands**

*Canisius Wilhelmina Ziekenhuis: Oscar Hoiting, MD, Marco Peters, MD, Els Rengers, MD, Mirjam Evers, RN, Anton Prinszen, RN;*

*Jeroen Bosch Ziekenhuis: Koen Simons, PhD, Wim Rozendaal MD, F. Polderman, MD, P. de Jager, PhD, M. Moviat, PhD, A. Paling, MD, A. Salet, MD.*

*UMC Utrecht: Marc Bonten, PhD, Lennie Derde, PhD, Emma Rademaker, MD, Anna Linda Peters, PhD;*

*Leiden University Medical Center: E. de Jonge, PhD, J. Wigbers, RN;*

### **New Zealand**

*Auckland City Hospital, Cardiothoracic and Vascular ICU: Shay McGuinness, MBChB, Rachael Parke, PhD, Eileen Guilder, MA, Magdalena Butler, RN, Keri-Anne Cowdrey, RN;*

*Auckland City Hospital, DCCM: Colin McArthur, FJFICM, Lynette Newby, MN, Yan Chen, MN, Catherine Simmonds, PGDipHSc, Rachael McConnochie, MN;*

*Christchurch Hospital: Jay Ritzema Carter, PhD, Seton Henderson, MD, Kym Van Der Heyden, BSc, Jan Mehrtens, PGCert;*

*Middlemore Hospital:* Tony Williams, BMedSc, Alex Kazemi, BMedSc, Rima Song, PGDip, Vivian Lai, MHSc, Dinu Girijadevi, PGCert;

*North Shore Hospital:* Robert Everitt, FACEM, Robert Russell, BSc(Hons), Danielle Hacking, PGDipNurs;

*Rotorua Hospital:* Ulrike Buehner, FCARCSI, Erin Williams, MSc;

*Tauranga Hospital:* Troy Browne, FCICM, Kate Grimwade, FRACP, Jennifer Goodson, Owen Keet, FANZCA, Owen Callender, FANZCA;

*Waikato Hospital:* Robert Martynoga, FCICM, Kara Trask, PGCert, Amelia Butler, PGCert, Livia Schischka, PGCert;

*Wellington Hospital:* Paul Young, PhD, Chelsea Young, PGDip, Eden Lesona, MNsc, Shaanti Olatunji, MClinIm, Yvonne Robertson, BN;

### **Portugal**

*Hospital de Abrantes:* Nuno José Teodoro Amaro dos Santos Catorze, MD, Tiago Nuno Alfaro de Lima Pereira, MD, Lucilia Maria Neves Pessoa, MD, Ricardo Manuel Castro Ferreira, RN, Joana Margarida Pereira Sousa Bastos, PharmD;

### **Romania**

*"Dr Victor Babes" Clinical Hospital of Infectious and Tropical Diseases Bucharest:* Simin Aysel Florescu, PhD, Delia Stanciu, MD, Miahela Florentina Zaharia, PhD, Alma Gabriela Kosa, MD, Daniel Codreanu;

### **Saudi Arabia**

*King Abdulaziz Medical City- Riyadh:* Yaseen Marabi, ATSF, Eman Al Qasim, MSN, Mohammed Moneer Hagazy, MD, Lolowa Al Swaidan, MSc, Hatim Arishi, RN

### **Spain**

*Hospital del Mar:* Rosana Muñoz-Bermúdez, MD, Judith Marin-Corral, PhD, Anna Salazar Degracia, PhD, Francisco Parrilla Gómez, MD, Maria Isabel Mateo López;

*Reina Sofia University Hospital:* Jorge Rodriguez Fernandez, MD, Sheila Cárcel Fernández, Rosario Carmona Flores, PhD, Rafael León López, PhD, Carmen de la Fuente Martos, PhD;

### **United Kingdom**

*Aberdeen Royal Infirmary:* Callum Kaye, MBChB, Angela Allan, PGDip;

*Addenbrooke's Hospital:* Charlotte Summers, PhD, Petra Polgarova MSc, Neda Farahi, PhD;

*Alder Hey Children's NHS Foundation Trust:* Stephen J McWilliam, PhD, Daniel B Hawcutt, MD, Laura Rad, BSc(Hons), Laura O'Malley, BSc(Hons), Jennifer Whitbread, BSc(Hons);

*Alexandra Hospital Redditch:* Olivia Kelsall, MBChB, Laura Wild, BSc(Hons), Jessica Thrush, RGN, Hannah Wood, BSc(Hons), Karen Austin, RGN;

*Altnagelvin Hospital:* Adrian Donnelly, FFICM, Martin Kelly, MD, Sinéad O'Kane, BSc(Hons), Declan McClintock, MSc, Majella Warnock, MPharm;

*Antrim Area Hospital:* Paul Johnston, FFARCSI, Linda Jude Gallagher, BSc(Hons), Clare Mc Goldrick, MPhil, Moyra Mc Master, RGN, Anna Strzelecka, MBBCh;

*Barnet Hospital:* Rajeev Jha, MD, Michael Kalogirou, MD, Christine Ellis, PhD, Vinodh Krishnamurthy, PhD, Vashish Deelchand, MSc;

*Belfast Health and Social Care Trust (Belfast City Hospital, Mater Infirmorium, Royal Victoria Hospital):* Jon Silversides, PhD, Peter McGuigan, MBBCh, Kathryn Ward, BSc, Aisling O'Neill, BSc, Stephanie Finn, BSc;

*Brighton and Sussex University Hospitals Trust:* Barbara Phillips, SFHEA, Dee Mullan, BSc(Hons), Laura Ortiz-Ruiz de Gordo, BSc;

*Bristol Royal Infirmary:* Jeremy Bewley, MBChB, Matthew Thomas, MBChB, Katie Sweet, BSc(Hons), Lisa Grimmer, BSc(Hons), Rebekah Johnson, BSc(Hons);

*Calderdale and Huddersfield Foundation Trust:* Jez Pinnell, MD, Matt Robinson, BSc(Hons), Lisa Gledhill, MSc, Tracy Wood, BSc(Hons);

*Cardiff and Vale University Health Board:* Matt Morgan, PhD, Jade Cole, BSc, Helen Hill, BSc, Michelle Davies,

BN;

*Charing Cross Hospital:* David Antcliffe, PhD, Maie Templeton, MSc, Roceld Rojo, BSN, Phoebe Coghlan, MA, Joanna Smees, BSc;

*Chesterfield Royal Hospital:* Euan Mackay, Jon Cort, Amanda Whileman, Thomas Spencer, Nick Spittle;

*The Christie NHS Foundation Trust:* Vidya Kasipandian, FFICM, Amit Patel, Suzanne Allibone, Roman Mary-Genetu;

*Colchester Hospital:* Mohamed Ramali, FRCA, Ooi HC, MRCEM, Alison Ghosh, RN;

*Countess of Chester Hospital:* Peter Bamford, FFICM, Emily London, MBChB, Kathryn Cawley, MRes, Maria Faulkner, BSc, Helen Jeffrey, DipNS;

*Cumberland Infirmary:* Tim Smith, FRCA, Chris Brewer, BPharm(Hons), Jane Gregory, BSc(Hons);

*Darlington Memorial Hospital:* James Limb, FRCA, Amanda Cowton, BSc(Hons), Julie O'Brien, DipNurs, Kelly Postlethwaite, DipNurs;

*Derriford Hospital:* Nikitas Nikitas, PhD, Colin Wells, MSc, Liana Lankester, PGCert;

*Dorset County Hospital:* Mark Pulletz, FFICM, Patricia Williams, AdDip, Jenny Birch, BA, Sophie Wiseman, Mpharm, Sarah Horton, BA(Hons);

*East Kent Hospitals (Queen Elizabeth the Queen Mother Hospital):* Ana Alegria, CCT, Salah Turki, MBBch, Tarek Elsefi, MRCP, Nikki Crisp, BSc, Louise Allen, BSc;

*Freeman Hospital and Royal Victoria Infirmary, Newcastle upon Tyne:* Iain J McCullagh, FRCA, Philip Robinson, MSc, Carole Hays, ADip, Maite Babio-Galan, PGCert, Hannah Stevenson;

*George Eliot Hospital:* Divya Khare, FRCA, Meredith Pinder, BSN, Selvin Selvamoni, MSc, Amitha Gopinath, MBA;

*Glan Clwyd Hospital:* Richard Pugh, FFICM, Daniel Menzies, FRCP, Callum Mackay, MBChB, Elizabeth Allan, PhD, Gwyneth Davies, RN;

*Glasgow Royal Infirmary:* Kathryn Puxty, MD, Claire McCue, MBChB, Susanne Cathcart, Naomi Hickey, Jane Ireland;

*Glenfield Hospital Leicester:* Hakeem Yusuff, FFICM, Graziella Isgro, FFICM, Chris Brightling, PhD, Michelle Bourne, BSc(Hons), Michelle Craner, DipHE;

*Great Western Hospitals NHS Foundation Trust:* Malcolm Watters, MBBCh, Rachel Prout, MBChB, Louisa Davies, BSc, Suzannah Pegler, BSc(Hons), Lynsey Kyeremeh, BPharm;

*Guy's & St Thomas' NHS Foundation Trust:* Manu Shankar-Hari, PhD, Gill Arbane, MRes, Karen Wilson, MSc, Linda Gomm, MSc, Federica Francia, BSc;

*Hammersmith Hospital:* Stephen Brett, MD, Sonia Sousa Arias, BSc, Rebecca Elin Hall, BN;

*Hereford County Hospital:* Joanna Budd, Charlotte Small, Janine Birch, RN, Emma Collins, BN;

*James Cook University Hospital:* Jeremy Henning, MB, Stephen Bonner, BSc, Keith Hugill, BSc, Emanuel Cirstea, MSc, Dean Wilkinson, BSc;

*James Paget University Hospitals:* Michal Karlikowski, MD, Helen Sutherland, BSc(Hons), Elva Wilhelmsen, DipHE, Jane Woods, Julie North, BSc(Hons);

*Kettering General Hospital:* Dhinesh Sundaran, FFICM, Laszlo Hollos, FFICM, Susan Coburn, PGCert, Joanne Walsh, BSc(Hons), Margaret Turns, BA;

*King's College Hospital (Denmark Hill site):* Phil Hopkins, John Smith, RN, Harriet Noble, RN, Maria Theresa Depante, RN, Emma Clarey, RN;

*Lancashire Teaching Hospitals:* Shondipon Laha, FRCA, Mark Verlander, MBA, Alexandra Williams, MSc, Abby Huckle, MBChB;

*Leicester General Hospital:* Andrew Hall, MRCP, Jill Cooke, RGN, Caroline Gardiner-Hill, RGN; Jill Cooke, RGN, Carolyn Maloney;

*Leicester Royal Infirmary:* Hafiz R Qureshi, MRCPI, Neil Flint, MBChB, Sarah Nicholson, Sara Southin, Andrew Nicholson;

*Liverpool Foundation Trust Aintree:* Barbara Borgatta, PhD, Ian Turner-Bone, DipHE, Amie Reddy, Laura Wilding, DipHE;

*Luton and Dunstable University Hospital:* Loku Chamara Warnapura, FFICM, Ronan Agno, BSc, Prasannakumari

Sathianathan, MSc;

*Maidstone Hospital:* David Golden, FFICM, Ciaran Hart, PGCert, Jo Jones, BSc(Hons);

*Manchester Royal Infirmary:* Jonathan Bannard-Smith, Joanne Henry, Katie Birchall, Fiona Pomeroy, Rachael Quayle;

*Medway Maritime Hospital:* Arystarch Makowski, PhD, Beata Misztal, PhD, Iram Ahmed, PhD, Thyra Kyere-Diabour, BSc, Kevin Naiker, MBA;

*Milton Keynes University Hospital:* Richard Stewart, Esther Mwaura, BSc, Louise E Mew, BSc(Hons), Lynn Wren, BSc(Hons), Felicity Williams, PhD;

*Musgrove Park Hospital:* Richard Innes, MBBCh, Patricia Doble, BSc(Hons), Joanne Hutter, DipHE, Charmaine Shovelton, BNurs, Benjamin Plumb, BMBS;

*Nevill Hall Hospital:* Tamas Szakmany, PhD, Vincent Hamlyn, MBBCh, Nancy Hawkins, PhD, Sarah Lewis, MBChB, Amanda Dell, PGCE;

*New Cross Hospital:* Shameer Gopal, MBBCh, Saibal Ganguly, MBBS, Andrew Smallwood, RGN, Nichola Harris, RGN, Stella Metherell, RGN;

*Newham University Hospital:* Juan Martin Lazaro, PhD, Tabitha Newman, MSc;

*Norfolk and Norwich University Hospital:* Simon Fletcher, FFICM, Jurgens Nortje, FFICM, Deirdre Fottrell-Gould, Dip, Georgina Randell, Dip;

*Northampton General Hospital:* Mohsin Zaman, MRCP, Einas Elmahi, MPhil, Andrea Jones, PhD, Kathryn Hall, Dip;

*Northern General Hospital, Sheffield:* Gary H Mills, PhD, Kim Ryalls, RegPharmTech, Helen Bowler, BSc, Jas Sall, BSc, Richard Bourne, PhD;

*North Manchester General Hospital:* Zoe Borrill, Tracey Duncan, Thomas Lamb, Joanne Shaw, Claire Fox;

*North Middlesex University Hospital:* Jeronimo Moreno Cuesta, MD, Kugan Xavier, MD, Dharam Purohit, EDIC, Munzir Elhassan, MBBS, Dhanalakshmi Bakthavatsalam, Dip;

*Oxford University Hospitals:* Matthew Rowland, FFICM, Paula Hutton, PGCert, Archana Bashyal, MSc, Neil Davidson, BSc, Clare Hird, MSc;

*Pilgrim Hospital Boston:* Manish Chhablani, FFICM, Gunjan Phalod, MPharm, Amy Kirkby, BSc(Hons), Simon Archer, BSc(Hons), Kimberley Netherton, RGN;

*Poole Hospital:* Henrik Reschreiter, FFICM, Julie Camsooksai, PGDE, Sarah Patch, BSc(Hons), Sarah Jenkins, BSc(Hons);

*Queen Alexandra Hospital Portsmouth:* David Pogson, MSc, Steve Rose, BSc, Zoe Daly, BSc, Lutece Brimfield, BN, Helen Claridge, BSc;

*Queen Elizabeth Hospital, Birmingham:* Dhruv Parekh, PhD, Colin Bergin, BSc, Michelle Bates, BSc, Joanne Dasgin, BSc, Christopher McGhee, BSc;

*Queen Elizabeth University Hospital, Glasgow:* Malcolm A.B. Sim, MD, Sophie Kennedy Hay, BN, Steven Henderson, MPH;

*Queen's Hospital, Romford:* Mandeep-Kaur Phull, MBBS, Abbas Zaidi, MBBS, Tatiana Pogreban, BN, Lace Paulyrn Rosaroso, BN;

*Queens Medical Centre and Nottingham City Hospital:* Daniel Harvey, BMBS, Benjamin Lowe, BMBS, Megan Meredith, BSc(Hons), Lucy Ryan, MNsc, DREEM Research Team;

*The Rotherham NHS Foundation Trust:* Anil Hormis, FRCA, Rachel Walker, BA, Dawn Collier, BSc, Sarah Kimpton, MSc, Susan Oakley;

*Royal Alexandra Hospital:* Kevin Rooney, MBChB, Natalie Rodden, BSc, Emma Hughes, BSc, Nicola Thomson, BSc(Hons), Deborah McGlynn, BSc;

*Royal Berkshire Hospital:* Andrew Walden, FFICM, Nicola Jacques, MSc, Holly Coles, BSc, Emma Tilney, BSc, Emma Vowell, DipHE;

*Royal Bournemouth and Christchurch Hospitals:* Martin Schuster-Bruce, FRCA, Sally Pitts, BSc, Rebecca Miln, ADipHE, Laura Purandare, MBA, Luke Vamplew, BSc;

*Royal Cornwall NHS Trust:* Michael Spivey, FFICM, Sarah Bean, RN, Karen Burt, RN, Lorraine Moore, MPharm;

*Royal Devon and Exeter NHS Foundation Trust:* Christopher Day, MD, Charly Gibson, MBChB, Elizabeth Gordon, BSc, Letizia Zitter, BSc, Samantha Keenan, BSc;

*Royal Gwent Hospital:* Tamas Szakmany, PhD, Evelyn Baker, MSc, Shiney Cherian, BSc(Hons), Sean Cutler, MSc, Anna Roynon-Reed, BA(Hons);

*Royal Hallamshire Hospital, Sheffield:* Gary H Mills, PhD, Kate Harrington, RN, Ajay Raithatha, FFICM, Kris Bauchmuller, FFICM, Norfaizan Ahmad, FFICM;

*Royal Hampshire Hospitals:* Irina Grecu, Dawn Trodd, Jane Martin, Caroline Wrey Brown, Ana-Marie Arias;

*Royal Infirmary of Edinburgh:* Thomas H Craven, PhD, David Hope, PGDip, Jo Singleton, BN, Sarah Clark, MNurs, Nicola Rae, MSc;

*Royal Liverpool University Hospital:* Ingeborg D Welters, PhD, David Oliver Hamilton, BMBS, Karen Williams, RGN, Victoria Waugh, BA, David Shaw, DipHE;

*Royal London Hospital:* Zudin Puthuchear, PhD, Timothy Martin, BA(Hons), Filipa Santos, RN, Ruzena Uddin, MSc(Hons), Alastair Somerville, MSc;

*The Royal Marsden NHS Foundation Trust:* Kate Colette Tatham, PhD, Shaman Jhanji, PhD, Ethel Black, BSNurs, Arnold Dela Rosa, BSNurs, Ryan Howle, FRCA;

*The Royal Oldham Hospital:* Redmond P Tully, FFICM, Andrew Drummond, FFICM, Joy Dearden, BSc, Jennifer E Philbin, MSc, Sheila Munt, SRN;

*Royal Papworth Hospital:* Alain Vuylsteke, MD, Charles Chan, FRCA, Saji Victor, COVID Research Team, Papworth Hospital;

*Royal Stoke Hospital:* Ramprasad Matsa, FRCP, Minerva Gellamucho, BSN;

*Royal Surrey County Hospital:* Ben Creagh-Brown, PhD, Joe Tooley, MSc, Laura Montague, BSc, Fiona De Beaux, BSc, Laetitia Bullman, MBChB;

*Royal United Hospital Bath:* Ian Kerslake, FFICM, Carrie Demetriou, RN, Sarah Mitchard, MBBS, Lidia Ramos, RN, Katie White, MSc;

*Salisbury NHS Foundation Trust:* Phil Donnison, FFICM, Maggie Johns, RGN, Ruth Casey, BSc, Lehentha Mattocks, Dip, Sarah Salisbury;

*Salford Royal NHS Foundation Trust:* Paul Dark, PhD, Andrew Claxton, MD, Danielle McLachlan, BSc, Kathryn Slevin, BSc, Stephanie Lee, DipHE;

*Sandwell and West Birmingham NHS Trust:* Jonathan Hulme, Sibet Joseph, Fiona Kinney, Ho Jan Senya;

*Southend University Hospital:* Aneta Oborska, FRCA, Abdul Kayani, MBBS, Bernard Hadebe, MSc, Rajalakshmi Orath Prabakaran, BSc, Lesley Nichols, Dip;

*Southmead Hospital:* Matt Thomas, FFICM, Ruth Worner, RGN, Beverley Faulkner, RGN, Emma Gendall, BSc, Kati Hayes, BSc;

*St. Bartholomew's Hospital:* Colin Hamilton-Davies, MBBS, Carmen Chan, BSc, Celina Mfuko, BSc, Hakam Abbass, MSc, Vineela Mandadapu, MSc;

*St. George's Hospital:* Susannah Leaver, MRCP, Daniel Forton, FRCP, Kamal Patel, MRCP, Clinical Research Facility Team;

*St. James's University Hospital and Leeds General Infirmary:* Elankumaran Paramasivam, FRCP, Matthew Powell, FFICM, Richard Gould, FFICM, Elizabeth Wilby, RGN, Clare Howcroft, RGN;

*St. Mary's Hospital:* Anthony Gordon, MD; Dorota Banach, BSc, Ziortza Fernández de Pinedo Artaraz, BN, Leilani Cabrerros, BSN;

*St. Peter's Hospital, Chertsey:* Ian White, FFICM, Maria Croft, BSc(Hons), Nicky Holland, BN(Hons), Rita Pereira, MPharm;

*Stepping Hill Hospital, Stockport:* Ahmed Zaki, PhD, David Johnson, MPhil, Matthew Jackson, MBChB, Hywel Garrard, BMBS, Vera Juhaz, MD;

*Sunderland Royal Hospital:* Alistair Roy, MBChB, Anthony Rostron, PhD, Lindsey Woods, BSc, Sarah Cornell, BSc;

*Swansea Bay University Health Board:* Suresh Pillai, FFCIM, Rachel Harford, RN, Tabitha Rees, MSc, Helen Ivatt, FRCA, Ajay Sundara Raman, MBBS;

*Tunbridge Wells Hospital:* David Golden, FFICM, Miriam Davey, PGDip;

*United Lincolnshire NHS Trust:* Kelvin Lee, PhD, Russell Barber, FRCA, Manish Chablani, FRCA;

*University Hospital of North Tees:* Farooq Brohi, FFARCSI, Vijay Jagannathan, FRCA, Michele Clark, MA, Sarah Purvis, Dip, Bill Wetherill, MSc;

*University Hospital Southampton NHS Foundation Trust:* Ahilanandan Dushianthan, PhD, Rebecca Cusack, MD, Kim de Courcy-Golder, PGDip, Simon Smith, BN, Susan Jackson, BSc;

*Warwick Hospital:* Ben Attwood, MBBCh, Penny Parsons, BSc;

*Watford General Hospital:* Valerie J Page, MBBCh, Xiao Bei Zhao, BSc, Deepali Oza, MPharm;

*Western General Hospital, Edinburgh:* Jonathan Rhodes, PhD, Tom Anderson, MBChB, Sheila Morris;

*Whipps Cross Hospital:* Charlotte Xia Le Tai, MBChB, Amy Thomas, MSc, Alexandra Keen, MSc;

*Worcester Royal Hospital:* Stephen Digby, MBBS, Nicholas Cowley, MD, Laura Wild, BSc(Hons), Jessica Thrush, RGN, Hannah Wood, BSc(Hons)

*Wrexham Maelor Betsi Cadwaladr University Hospital:* David Southern, FFICM, Harsha Reddy, FFICM, Andy Campbell, FFICM, Claire Watkins, PGDip, Sara Smuts, BN;

*Wrexham Park Hospital:* Omar Touma, MD, Nicky Barnes;

*Wythenshawe Hospital:* Peter D G Alexander, FFICM, Tim Felton, FFICM, Susan Ferguson, BSc, Katharine Sellers, BSc, Joanne Bradley-Potts, BSc;

*York Teaching Hospital:* David Yates, FCRA, Isobel Birkinshaw, BSc(Hons), Kay Kell, BSc(Hons), Nicola Marshall, BA(Hons), Lisa Carr-Knott, MSc;

#### **United States**

*UPMC Health System:* Tim Girard, MD, David Huang, MD, MPH, Kelsey Linstrum, MS; Erin McCreary, PharmD, Bryan McVerry, MD
