# Supplementary material
Source: PubMed Central journal article supplement (PMC7489418)
Supplement: jama-e2017022-s003.pdf [file jama-e2017022-s003.pdf]

## Data Sharing Statement

Angus. Effect of Hydrocortisone on Mortality and Organ Support in Patients With Severe COVID-19. *JAMA*. Published September 02, 2020. 10.1001/jama.2020.17022

### Data

**Data available:** Yes

**Data types:** Other (please specify)

**Additional Information:** data will be available to researchers on request subject to sponsor restrictions

**How to access data:** Contact Cameron Green at [cameron.green@monash.edu](mailto:cameron.green@monash.edu)

**When available:** beginning date: 02-04-2021, end date: 02-04-2026

### Supporting Documents

**Document types:** Statistical/analytic code

**How to access documents:** Contact Cameron Green at [cameron.green@monash.edu](mailto:cameron.green@monash.edu)

**When available:** beginning date: 02-04-2021, end date: 02-04-2026

### Additional Information

**Who can access the data:** Contact Cameron Green at [cameron.green@monash.edu](mailto:cameron.green@monash.edu)

**Types of analyses:** for specified purpose

**Mechanisms of data availability:** with investigator support
